# Supplementary material
Source: PubMed Central journal article supplement (PMC2745223)
Supplement: NIHMS119560-supplement-LotsaTables.pdf [file NIHMS119560-supplement-LotsaTables.pdf]

# Treating entropy and conformational changes in implicit solvent simulations of small molecules: Supporting Information

David L. Mobley, John D. Chodera and Ken A. Dill

*Draft date August 9, 2007*

**TABLE 1:** The small molecule test set used here, with names and experimental hydration free energy values (in kcal/mol), as well as references to the source of the experimental values. Numbering up to 600 corresponds to the numbering used in the Rizzo test set<sup>1</sup> and is not necessarily consecutive. Numbering after 600 is unique to this set, which contains only neutral molecules. Values are transfer free energies from 1M gas to 1M in solvent. In the column with names of compounds, spaces have been replaced by underscores, following the formatting of Rizzo *et al.*

| Number | Name                          | Hydration free energy | Reference |
|--------|-------------------------------|-----------------------|-----------|
| 1      | methane                       | 1.99                  | 1         |
| 2      | ethane                        | 1.83                  | 1         |
| 3      | propane                       | 1.96                  | 1         |
| 4      | n-butane                      | 2.07                  | 1         |
| 5      | 2-methylpropane               | 2.32                  | 1         |
| 6      | n-pentane                     | 2.32                  | 1         |
| 7      | 2-methylbutane                | 2.38                  | 1         |
| 8      | 2,2-dimethylpropane           | 2.51                  | 1         |
| 9      | n-hexane                      | 2.48                  | 1         |
| 10     | 2-methylpentane               | 2.51                  | 1         |
| 11     | 3-methylpentane               | 2.51                  | 1         |
| 12     | 2,2-dimethylbutane            | 2.51                  | 1         |
| 13     | 2,3-dimethylbutane            | 2.34                  | 1         |
| 14     | n-heptane                     | 2.67                  | 1         |
| 15     | 2-methylhexane                | 2.93                  | 1         |
| 16     | 3-methylhexane                | 2.71                  | 1         |
| 17     | 2,2-dimethylpentane           | 2.88                  | 1         |
| 18     | 2,3-dimethylpentane           | 2.52                  | 1         |
| 19     | 2,4-dimethylpentane           | 2.83                  | 1         |
| 20     | 3,3-dimethylpentane           | 2.56                  | 1         |
| 21     | n-octane                      | 2.88                  | 1         |
| 22     | 3-methylheptane               | 2.97                  | 1         |
| 23     | 2,2,4-trimethylpentane        | 2.89                  | 1         |
| 24     | 2,3,4-trimethylpentane        | 2.56                  | 1         |
| 25     | n-nonane                      | 3.13                  | 1         |
| 26     | 2,2,5-trimethylhexane         | 2.93                  | 1         |
| 27     | n-decane                      | 3.16                  | 1         |
| 28     | cyclopropane                  | 0.75                  | 1         |
| 29     | cyclopentane                  | 1.20                  | 1         |
| 30     | methylcyclopentane            | 1.59                  | 1         |
| 31     | n-propylcyclopentane          | 2.13                  | 1         |
| 32     | n-pentylcyclopentane          | 2.55                  | 1         |
| 33     | cyclohexane                   | 1.23                  | 1         |
| 34     | methylcyclohexane             | 1.70                  | 1         |
| 35     | cis-1,2-dimethylcyclohexane   | 1.58                  | 1         |
| 36     | trans-1,4-dimethylcyclohexane | 2.11                  | 1         |
| 37     | ethene                        | 1.28                  | 1         |
| 38     | propene                       | 1.32                  | 1         |
| 39     | but-1-ene                     | 1.38                  | 1         |

|    |                            |       |   |
|----|----------------------------|-------|---|
| 40 | pent-1-ene                 | 1.68  | 1 |
| 41 | (Z)-pent-2-ene             | 1.31  | 1 |
| 42 | 3-methyl-but-1-ene         | 1.83  | 1 |
| 43 | 2-methyl-but-2-ene         | 1.31  | 1 |
| 44 | hex-1-ene                  | 1.58  | 1 |
| 45 | 2-methylpent-1-ene         | 1.47  | 1 |
| 46 | hept-1-ene                 | 1.66  | 1 |
| 47 | (E)-hept-2-ene             | 1.68  | 1 |
| 48 | oct-1-ene                  | 1.92  | 1 |
| 49 | non-1-ene                  | 2.06  | 1 |
| 50 | buta-1,3-diene             | 0.61  | 1 |
| 51 | 2-methylbuta-1,3-diene     | 0.68  | 1 |
| 52 | 2,3-dimethylbuta-1,3-diene | 0.40  | 1 |
| 53 | penta-1,4-diene            | 0.93  | 1 |
| 54 | hexa-1,5-diene             | 1.01  | 1 |
| 55 | cyclopentene               | 0.56  | 1 |
| 56 | cyclohexene                | 0.37  | 1 |
| 57 | 1-methylcyclohexene        | 0.67  | 1 |
| 58 | cyclohepta-1,3,5-triene    | -0.99 | 1 |
| 59 | propyne                    | -0.48 | 1 |
| 60 | but-1-yne                  | -0.16 | 1 |
| 61 | pent-1-yne                 | 0.01  | 1 |
| 62 | hex-1-yne                  | 0.29  | 1 |
| 63 | hept-1-yne                 | 0.60  | 1 |
| 64 | oct-1-yne                  | 0.71  | 1 |
| 65 | tetrafluoromethane         | 3.12  | 1 |
| 66 | chloromethane              | -0.55 | 1 |
| 67 | dichloromethane            | -1.31 | 1 |
| 68 | trichloromethane           | -1.08 | 1 |
| 69 | tetrachloromethane         | 0.08  | 1 |
| 70 | chloroethane               | -0.63 | 1 |
| 71 | 1,1-dichloroethane         | -0.84 | 1 |
| 72 | 1,2-dichloroethane         | -1.79 | 1 |
| 73 | 1,1,1-trichloroethane      | -0.19 | 1 |
| 74 | 1,1,2-trichloroethane      | -1.99 | 1 |
| 75 | 1,1,2,2-tetrachloroethane  | -2.47 | 1 |
| 76 | 1,1,1,2-tetrachloroethane  | -1.28 | 1 |
| 77 | pentachloroethane          | -1.39 | 1 |
| 78 | 1-chloropropane            | -0.33 | 1 |
| 79 | 2-chloropropane            | -0.25 | 1 |
| 80 | 1,2-dichloropropane        | -1.27 | 1 |
| 81 | 1,3-dichloropropane        | -1.89 | 1 |
| 82 | 1-chlorobutane             | -0.16 | 1 |
| 83 | 2-chlorobutane             | 0.00  | 1 |
| 84 | 2-chloro-2-methylpropane   | 1.09  | 1 |
| 85 | 1,4-dichlorobutane         | -2.32 | 1 |
| 86 | 1-chloropentane            | -0.07 | 1 |
| 87 | 1-chlorohexane             | 0.00  | 1 |
| 88 | 1-chloroheptane            | 0.29  | 1 |
| 89 | 1,1-dichloroethene         | 0.25  | 1 |
| 90 | (Z)-1,2-dichloroethene     | -1.17 | 1 |
| 91 | (E)-1,2-dichloroethene     | -0.78 | 1 |
| 92 | trichloroethene            | -0.44 | 1 |
| 93 | tetrachloroethene          | 0.10  | 1 |
| 94 | 3-chloroprop-1-ene         | -0.57 | 1 |
| 95 | bromomethane               | -0.82 | 1 |
| 96 | dibromomethane             | -1.96 | 1 |
| 97 | tribromomethane            | -2.13 | 1 |
| 98 | bromoethane                | -0.74 | 1 |
| 99 | 1,2-dibromoethane          | -2.33 | 1 |

|     |                             |       |   |
|-----|-----------------------------|-------|---|
| 100 | 1-bromopropane              | -0.56 | 1 |
| 101 | 2-bromopropane              | -0.48 | 1 |
| 102 | 1-bromobutane               | -0.40 | 1 |
| 103 | 1-bromo-2-methylpropane     | -0.03 | 1 |
| 104 | 2-bromo-2-methylpropane     | 0.84  | 1 |
| 105 | 1-bromopentane              | -0.10 | 1 |
| 106 | 1-bromohexane               | 0.18  | 1 |
| 107 | 1-bromoheptane              | 0.34  | 1 |
| 108 | 1-bromooctane               | 0.52  | 1 |
| 109 | iodomethane                 | -0.89 | 1 |
| 110 | iodoethane                  | -0.74 | 1 |
| 111 | 1-iodopropane               | -0.53 | 1 |
| 112 | 1-iodobutane                | -0.25 | 1 |
| 113 | 1-iodopentane               | -0.14 | 1 |
| 114 | 1-iodohexane                | 0.08  | 1 |
| 115 | 1-iodoheptane               | 0.27  | 1 |
| 116 | halothane                   | -0.11 | 1 |
| 117 | teflurane                   | 0.50  | 1 |
| 118 | diethyl_ether               | -1.59 | 1 |
| 119 | di-n-propyl_ether           | -1.16 | 1 |
| 120 | diisopropyl_ether           | -0.53 | 1 |
| 121 | di-n-butyl_ether            | -0.83 | 1 |
| 122 | methoxyflurane              | -1.12 | 1 |
| 123 | isoflurane                  | 0.10  | 1 |
| 124 | tetrahydrofuran             | -3.47 | 1 |
| 125 | 2-methyltetrahydrofuran     | -3.30 | 1 |
| 126 | 2,5-dimethyltetrahydrofuran | -2.92 | 1 |
| 127 | tetrahydropyran             | -3.12 | 1 |
| 128 | 1,4-dioxane                 | -5.06 | 1 |
| 129 | isobutyraldehyde            | -2.86 | 1 |
| 130 | formaldehyde                | -2.75 | 1 |
| 131 | acetaldehyde                | -3.50 | 1 |
| 132 | propionaldehyde             | -3.43 | 1 |
| 133 | butyraldehyde               | -3.18 | 1 |
| 134 | pentanal                    | -3.03 | 1 |
| 135 | hexanal                     | -2.81 | 1 |
| 136 | heptanal                    | -2.67 | 1 |
| 137 | octanal                     | -2.29 | 1 |
| 138 | nonanal                     | -2.07 | 1 |
| 139 | (E)-but-2-enal              | -4.22 | 1 |
| 140 | (E)-hex-2-enal              | -3.68 | 1 |
| 141 | (E)-oct-2-enal              | -3.43 | 1 |
| 142 | propanone                   | -3.80 | 1 |
| 143 | butanone                    | -3.71 | 1 |
| 144 | pentan-2-one                | -3.52 | 1 |
| 145 | pentan-3-one                | -3.41 | 1 |
| 146 | 3-methylbutan-2-one         | -3.24 | 1 |
| 147 | hexan-2-one                 | -3.28 | 1 |
| 148 | 4-methylpentan-2-one        | -3.05 | 1 |
| 149 | heptan-2-one                | -3.04 | 1 |
| 150 | heptan-4-one                | -2.92 | 1 |
| 151 | octan-2-one                 | -2.88 | 1 |
| 152 | nonan-2-one                 | -2.49 | 1 |
| 153 | nonan-5-one                 | -2.64 | 1 |
| 154 | decan-2-one                 | -2.34 | 1 |
| 155 | undecan-2-one               | -2.15 | 1 |
| 156 | cyclopentanone              | -4.70 | 1 |
| 157 | cyclohexanone               | -4.91 | 1 |
| 158 | methyl_formate              | -2.78 | 1 |
| 159 | ethyl_formate               | -2.56 | 1 |

|     |                       |       |   |
|-----|-----------------------|-------|---|
| 160 | n-propyl_formate      | -2.48 | 1 |
| 161 | isopropyl_formate     | -2.02 | 1 |
| 162 | isobutyl_formate      | -2.22 | 1 |
| 163 | isoamyl_formate       | -2.13 | 1 |
| 164 | methyl_acetate        | -3.13 | 1 |
| 165 | ethyl_acetate         | -2.94 | 1 |
| 166 | n-propyl_acetate      | -2.79 | 1 |
| 167 | isopropyl_acetate     | -2.64 | 1 |
| 168 | n-butyl_acetate       | -2.64 | 1 |
| 169 | isobutyl_acetate      | -2.36 | 1 |
| 170 | n-pentyl_acetate      | -2.51 | 1 |
| 171 | isoamyl_acetate       | -2.21 | 1 |
| 172 | n-hexyl_acetate       | -2.26 | 1 |
| 173 | methyl_propanoate     | -2.93 | 1 |
| 174 | ethyl_propanoate      | -2.68 | 1 |
| 175 | n-propyl_propanoate   | -2.44 | 1 |
| 176 | n-pentyl_propanoate   | -2.11 | 1 |
| 177 | methyl_butanoate      | -2.83 | 1 |
| 178 | ethyl_butanoate       | -2.49 | 1 |
| 179 | n-propyl_butyrate     | -2.28 | 1 |
| 180 | methyl_pentanoate     | -2.56 | 1 |
| 181 | ethyl_pentanoate      | -2.49 | 1 |
| 182 | methyl_hexanoate      | -2.49 | 1 |
| 183 | ethyl_hexanoate       | -2.23 | 1 |
| 184 | isobutyl_isobutanoate | -1.69 | 1 |
| 186 | propanenitrile        | -3.84 | 1 |
| 187 | butanenitrile         | -3.64 | 1 |
| 188 | pentanenitrile        | -3.52 | 1 |
| 189 | ammonia               | -4.29 | 1 |
| 190 | methylamine           | -4.55 | 1 |
| 191 | ethylamine            | -4.50 | 1 |
| 192 | n-propylamine         | -4.39 | 1 |
| 193 | n-butylamine          | -4.24 | 1 |
| 194 | n-pentylamine         | -4.09 | 1 |
| 195 | n-hexylamine          | -3.95 | 1 |
| 196 | n-heptylamine         | -3.79 | 1 |
| 197 | n-octylamine          | -3.65 | 1 |
| 198 | cyclohexylamine       | -4.59 | 1 |
| 199 | dimethylamine         | -4.29 | 1 |
| 200 | diethylamine          | -4.07 | 1 |
| 201 | di-n-propylamine      | -3.65 | 1 |
| 202 | diisopropylamine      | -3.22 | 1 |
| 203 | di-n-butylamine       | -3.24 | 1 |
| 204 | trimethylamine        | -3.20 | 1 |
| 205 | triethylamine         | -3.22 | 1 |
| 206 | nitromethane          | -4.02 | 1 |
| 207 | nitroethane           | -3.71 | 1 |
| 208 | 1-nitropropane        | -3.34 | 1 |
| 209 | 2-nitropropane        | -3.13 | 1 |
| 210 | 1-nitrobutane         | -3.09 | 1 |
| 211 | 1-nitropentane        | -2.82 | 1 |
| 212 | n-butylacetamide      | -9.31 | 1 |
| 213 | N,N-dimethylformamide | -7.81 | 1 |
| 214 | acetic_acid           | -6.69 | 1 |
| 215 | propanoic_acid        | -6.46 | 1 |
| 216 | butanoic_acid         | -6.35 | 1 |
| 217 | pentanoic_acid        | -6.16 | 1 |
| 218 | 3-methylbutanoic_acid | -6.09 | 1 |
| 219 | hexanoic_acid         | -6.21 | 1 |
| 221 | methanol              | -5.10 | 1 |

|     |                        |       |   |
|-----|------------------------|-------|---|
| 222 | ethanol                | -5.00 | 1 |
| 223 | propan-1-ol            | -4.85 | 1 |
| 224 | propan-2-ol            | -4.74 | 1 |
| 225 | butan-1-ol             | -4.72 | 1 |
| 226 | 2-methylpropan-1-ol    | -4.50 | 1 |
| 227 | butan-2-ol             | -4.62 | 1 |
| 228 | 2-methylpropan-2-ol    | -4.47 | 1 |
| 229 | pentan-1-ol            | -4.57 | 1 |
| 230 | pentan-2-ol            | -4.39 | 1 |
| 231 | pentan-3-ol            | -4.35 | 1 |
| 232 | 2-methylbutan-1-ol     | -4.42 | 1 |
| 233 | 3-methylbutan-1-ol     | -4.42 | 1 |
| 234 | 2-methylbutan-2-ol     | -4.43 | 1 |
| 235 | hexan-1-ol             | -4.40 | 1 |
| 236 | hexan-3-ol             | -4.06 | 1 |
| 237 | 2-methylpentan-2-ol    | -3.92 | 1 |
| 238 | 4-methylpentan-2-ol    | -3.73 | 1 |
| 239 | 2-methylpentan-3-ol    | -3.88 | 1 |
| 240 | heptan-1-ol            | -4.21 | 1 |
| 241 | octan-1-ol             | -4.09 | 1 |
| 242 | nonan-1-ol             | -3.88 | 1 |
| 243 | decan-1-ol             | -3.64 | 1 |
| 244 | cyclopentanol          | -5.49 | 1 |
| 245 | cyclohexanol           | -5.46 | 1 |
| 246 | cycloheptanol          | -5.48 | 1 |
| 247 | prop-2-en-1-ol         | -5.03 | 1 |
| 248 | 2-methoxyethanol       | -6.76 | 1 |
| 249 | 2-ethoxyethanol        | -6.69 | 1 |
| 250 | 2-propoxyethanol       | -6.40 | 1 |
| 251 | 2-butoxyethanol        | -6.25 | 1 |
| 252 | 2,2,2-trifluoroethanol | -4.31 | 1 |
| 253 | hexafluoropropene      | -3.76 | 1 |
| 254 | ethanethiol            | -1.14 | 1 |
| 255 | n-propanethiol         | -1.06 | 1 |
| 256 | n-butanethiol          | -0.99 | 1 |
| 257 | diethyl_sulfide        | -1.46 | 1 |
| 258 | di-n-propyl_sulfide    | -1.28 | 1 |
| 259 | di-isopropyl_sulfide   | -1.21 | 1 |
| 260 | diethyl_disulfide      | -1.64 | 1 |
| 262 | triethyl_phosphate     | -7.54 | 1 |
| 263 | N-methylpiperidine     | -3.88 | 1 |
| 264 | N-acetylpyrrolidine    | -9.80 | 1 |
| 265 | morpholine             | -7.17 | 1 |
| 266 | N-methylmorpholine     | -6.32 | 1 |
| 267 | benzene                | -0.86 | 1 |
| 268 | toluene                | -0.89 | 1 |
| 269 | ethylbenzene           | -0.79 | 1 |
| 270 | o-xylene               | -0.90 | 1 |
| 271 | m-xylene               | -0.83 | 1 |
| 272 | p-xylene               | -0.80 | 1 |
| 273 | n-propylbenzene        | -0.53 | 1 |
| 274 | isopropylbenzene       | -0.30 | 1 |
| 275 | 1,2,3-trimethylbenzene | -1.21 | 1 |
| 276 | 1,2,4-trimethylbenzene | -0.86 | 1 |
| 277 | 1,3,5-trimethylbenzene | -0.90 | 1 |
| 278 | 2-ethyltoluene         | -1.04 | 1 |
| 279 | 4-ethyltoluene         | -0.95 | 1 |
| 280 | n-butylbenzene         | -0.40 | 1 |
| 281 | isobutylbenzene        | 0.16  | 1 |
| 282 | sec-butylbenzene       | -0.45 | 1 |

|     |                            |        |   |
|-----|----------------------------|--------|---|
| 283 | tert-butylbenzene          | -0.44  | 1 |
| 284 | 4-isopropyltoluene         | -0.68  | 1 |
| 285 | n-pentylbenzene            | -0.23  | 1 |
| 286 | n-hexylbenzene             | -0.04  | 1 |
| 287 | styrene                    | -1.24  | 1 |
| 288 | alpha-methylstyrene        | -1.24  | 1 |
| 289 | biphenyl                   | -2.66  | 1 |
| 290 | naphthalene                | -2.40  | 1 |
| 291 | 1-methylnaphthalene        | -2.44  | 1 |
| 292 | 1,3-dimethylnaphthalene    | -2.47  | 1 |
| 293 | 1,4-dimethylnaphthalene    | -2.82  | 1 |
| 294 | 2,3-dimethylnaphthalene    | -2.78  | 1 |
| 295 | 2,6-dimethylnaphthalene    | -2.63  | 1 |
| 296 | 1-ethylnaphthalene         | -2.40  | 1 |
| 297 | indane                     | -1.46  | 1 |
| 298 | acenaphthene               | -3.15  | 1 |
| 299 | fluorene                   | -3.35  | 1 |
| 300 | fluorobenzene              | -0.80  | 1 |
| 301 | benzotrifluoride           | -0.25  | 1 |
| 302 | chlorobenzene              | -1.12  | 1 |
| 303 | 1,2-dichlorobenzene        | -1.36  | 1 |
| 304 | 1,3-dichlorobenzene        | -0.98  | 1 |
| 305 | 1,4-dichlorobenzene        | -1.01  | 1 |
| 306 | 1,2,3-trichlorobenzene     | -1.24  | 1 |
| 307 | 1,2,4-trichlorobenzene     | -1.12  | 1 |
| 308 | 1,3,5-trichlorobenzene     | -0.78  | 1 |
| 309 | 1,2,3,4-tetrachlorobenzene | -1.34  | 1 |
| 310 | 1,2,3,5-tetrachlorobenzene | -1.62  | 1 |
| 311 | 1,2,4,5-tetrachlorobenzene | -1.34  | 1 |
| 312 | 2-chlorotoluene            | -1.14  | 1 |
| 313 | bromobenzene               | -1.46  | 1 |
| 314 | 4-bromotoluene             | -1.39  | 1 |
| 315 | iodobenzene                | -1.74  | 1 |
| 316 | anisole                    | -2.45  | 1 |
| 317 | ethyl_phenyl_ether         | -2.22  | 1 |
| 318 | benzaldehyde               | -4.02  | 1 |
| 319 | 4-methylbenzaldehyde       | -4.27  | 1 |
| 320 | acetophenone               | -4.58  | 1 |
| 321 | 4-methylacetophenone       | -4.70  | 1 |
| 322 | methyl_benzoate            | -3.92  | 1 |
| 323 | ethyl_benzoate             | -3.64  | 1 |
| 324 | benzonitrile               | -4.21  | 1 |
| 325 | o-toluidine                | -5.53  | 1 |
| 326 | p-toluidine                | -5.57  | 1 |
| 327 | 2,6-dimethylaniline        | -5.21  | 1 |
| 328 | 2-chloroaniline            | -4.91  | 1 |
| 329 | 3-chloroaniline            | -5.82  | 1 |
| 330 | 4-chloroaniline            | -5.90  | 1 |
| 331 | 2-methoxyaniline           | -6.12  | 1 |
| 332 | 3-methoxyaniline           | -7.29  | 1 |
| 333 | 4-methoxyaniline           | -7.48  | 1 |
| 334 | 2-nitroaniline             | -7.37  | 1 |
| 335 | 3-nitroaniline             | -8.84  | 1 |
| 336 | 4-nitroaniline             | -10.27 | 1 |
| 337 | 1-naphthylamine            | -7.28  | 1 |
| 338 | 2-naphthylamine            | -7.47  | 1 |
| 339 | N-methylaniline            | -4.69  | 1 |
| 340 | N,N-dimethylaniline        | -3.45  | 1 |
| 341 | nitrobenzene               | -4.12  | 1 |
| 342 | 2-nitrotoluene             | -3.58  | 1 |

|     |                         |        |   |
|-----|-------------------------|--------|---|
| 343 | 3-nitrotoluene          | -3.45  | 1 |
| 344 | benzamide               | -11.00 | 1 |
| 345 | phenol                  | -6.61  | 1 |
| 346 | o-cresol                | -5.87  | 1 |
| 347 | p-cresol                | -6.13  | 1 |
| 348 | 2,3-dimethylphenol      | -6.16  | 1 |
| 349 | 2,4-dimethylphenol      | -6.01  | 1 |
| 350 | 2,5-dimethylphenol      | -5.91  | 1 |
| 351 | 2,6-dimethylphenol      | -5.26  | 1 |
| 352 | 3,4-dimethylphenol      | -6.50  | 1 |
| 353 | 3,5-dimethylphenol      | -6.27  | 1 |
| 354 | 3-ethylphenol           | -6.25  | 1 |
| 355 | 4-ethylphenol           | -6.13  | 1 |
| 356 | 4-n-propylphenol        | -5.90  | 1 |
| 357 | 4-tert-butylphenol      | -5.91  | 1 |
| 358 | 2-fluorophenol          | -5.29  | 1 |
| 359 | 4-fluorophenol          | -6.19  | 1 |
| 360 | 2-chlorophenol          | -4.55  | 1 |
| 361 | 3-chlorophenol          | -6.62  | 1 |
| 362 | 4-chlorophenol          | -7.03  | 1 |
| 363 | 4-chloro-3-methylphenol | -6.79  | 1 |
| 364 | 4-bromophenol           | -7.13  | 1 |
| 365 | 2-iodophenol            | -6.20  | 1 |
| 366 | 2-methoxyphenol         | -5.57  | 1 |
| 367 | 3-methoxyphenol         | -7.66  | 1 |
| 368 | 3-hydroxybenzaldehyde   | -9.50  | 1 |
| 369 | 4-hydroxybenzaldehyde   | -8.83  | 1 |
| 370 | 3-cyanophenol           | -9.65  | 1 |
| 371 | 4-cyanophenol           | -10.17 | 1 |
| 372 | 2-nitrophenol           | -4.58  | 1 |
| 373 | 3-nitrophenol           | -9.62  | 1 |
| 374 | 4-nitrophenol           | -10.64 | 1 |
| 375 | 1-naphthol              | -7.67  | 1 |
| 376 | 2-naphthol              | -8.11  | 1 |
| 377 | benzyl_alcohol          | -6.62  | 1 |
| 378 | 2-phenylethanol         | -6.79  | 1 |
| 379 | 3-phenylpropanol        | -6.92  | 1 |
| 380 | thiophenol              | -2.55  | 1 |
| 381 | phenyl_methyl_sulfide   | -2.73  | 1 |
| 382 | pyridine                | -4.69  | 1 |
| 383 | 2-methylpyridine        | -4.63  | 1 |
| 384 | 3-methylpyridine        | -4.77  | 1 |
| 385 | 4-methylpyridine        | -4.93  | 1 |
| 386 | 2,3-dimethylpyridine    | -4.82  | 1 |
| 387 | 2,4-dimethylpyridine    | -4.86  | 1 |
| 388 | 2,5-dimethylpyridine    | -4.72  | 1 |
| 389 | 2,6-dimethylpyridine    | -4.59  | 1 |
| 390 | 3,4-dimethylpyridine    | -5.22  | 1 |
| 391 | 3,5-dimethylpyridine    | -4.84  | 1 |
| 392 | 2-ethylpyridine         | -4.33  | 1 |
| 393 | 3-ethylpyridine         | -4.59  | 1 |
| 394 | 4-ethylpyridine         | -4.73  | 1 |
| 395 | 2-chloropyridine        | -4.39  | 1 |
| 396 | 3-chloropyridine        | -4.01  | 1 |
| 397 | 3-cyanopyridine         | -6.75  | 1 |
| 398 | 4-cyanopyridine         | -6.02  | 1 |
| 399 | 3-formylpyridine        | -7.10  | 1 |
| 400 | 4-formylpyridine        | -7.00  | 1 |
| 401 | 3-acetylpyridine        | -8.26  | 1 |
| 402 | 4-acetylpyridine        | -7.62  | 1 |

|     |                                       |        |   |
|-----|---------------------------------------|--------|---|
| 403 | quinoline                             | -5.72  | 1 |
| 404 | 2-methylpyrazine                      | -5.51  | 1 |
| 405 | 2-ethylpyrazine                       | -5.45  | 1 |
| 406 | 2-isobutylpyrazine                    | -5.04  | 1 |
| 407 | thiophene                             | -1.42  | 1 |
| 408 | 2-methylthiophene                     | -1.38  | 1 |
| 409 | dimethyl_ether                        | -1.91  | 1 |
| 410 | methyl_ethyl_ether                    | -2.10  | 1 |
| 411 | methyl-tert-butyl_ether               | -2.21  | 1 |
| 412 | 3,3-dimethylbutan-2-one               | -3.11  | 1 |
| 413 | 2,4-dimethylpentan-3-one              | -2.74  | 1 |
| 414 | methyl_cyclopropyl_ketone             | -4.61  | 1 |
| 415 | methyl_cyclohexyl_ketone              | -3.90  | 1 |
| 416 | methyl.trimethylacetate               | -2.40  | 1 |
| 417 | methyl_cyclopropanecarboxylate        | -4.10  | 1 |
| 418 | methyl_cyclohexanecarboxylate         | -3.30  | 1 |
| 419 | dimethyl_sulfide                      | -1.61  | 1 |
| 420 | methyl_ethyl_sulfide                  | -1.50  | 1 |
| 422 | 4-methoxyacetophenone                 | -4.40  | 1 |
| 424 | anthracene                            | -3.95  | 1 |
| 425 | phenanthrene                          | -3.88  | 1 |
| 426 | pyrene                                | -4.52  | 1 |
| 500 | 2-methylpropene                       | 1.16   | 1 |
| 502 | 1,2-ethanediol                        | -9.30  | 1 |
| 503 | m-cresol                              | -5.49  | 1 |
| 504 | methyl-propyl-ether                   | -1.66  | 1 |
| 505 | methyl-isopropyl-ether                | -2.01  | 1 |
| 506 | 1,2-dimethoxyethane                   | -4.84  | 1 |
| 507 | methyl-octanoate                      | -2.04  | 1 |
| 509 | azetidine                             | -5.56  | 1 |
| 510 | pyrrolidine                           | -5.48  | 1 |
| 511 | piperazine                            | -7.40  | 1 |
| 512 | N-methylpiperazine                    | -7.77  | 1 |
| 513 | piperidine                            | -5.11  | 1 |
| 514 | aniline                               | -5.49  | 1 |
| 515 | ethanamide                            | -9.71  | 1 |
| 516 | N-methylacetamide                     | -10.00 | 1 |
| 517 | 2-methoxyethanamine                   | -6.55  | 1 |
| 518 | hydrazine                             | -9.30  | 1 |
| 519 | methanethiol                          | -1.24  | 1 |
| 520 | hydrogen_sulfide                      | -0.70  | 1 |
| 521 | dimethyl-disulfide                    | -1.83  | 1 |
| 522 | fluoromethane                         | -0.22  | 1 |
| 523 | 1,1-difluoroethane                    | -0.11  | 1 |
| 524 | chloroethylene                        | -0.59  | 1 |
| 525 | p-dibromobenzene                      | -2.30  | 1 |
| 526 | diiodomethane                         | -2.49  | 1 |
| 527 | 2-iodopropane                         | -0.46  | 1 |
| 528 | bromotrifluoromethane                 | 1.79   | 1 |
| 529 | chlorofluoromethane                   | -0.77  | 1 |
| 530 | chlorodifluoromethane                 | -0.50  | 1 |
| 531 | 1-bromo-2-chloroethane                | -1.95  | 1 |
| 532 | 1-chloro-2,2,2-trifluoroethane        | 0.06   | 1 |
| 533 | 1,1,2-trichloro-1,2,2-trifluoroethane | 1.77   | 1 |
| 534 | 1,1,1-trifluoropropan-2-ol            | -4.16  | 1 |
| 535 | 1H-imidazole                          | -9.63  | 1 |
| 536 | 1H-pyrrole                            | -4.78  | 1 |
| 537 | 1-methyl-pyrrole                      | -2.89  | 1 |
| 538 | 1-methyl-imidazole                    | -8.41  | 1 |
| 600 | 2-methylbut-2-ene                     | 1.31   | 2 |



|     |                                           |        |          |
|-----|-------------------------------------------|--------|----------|
| 601 | 3-methylbut-1-ene                         | 1.82   | 2        |
| 602 | acetonitrile                              | -3.88  | 2        |
| 610 | 3-methyl-1h-indole                        | -5.88  | 3        |
| 611 | 4-methyl-1h-imidazole                     | -10.27 | 3        |
| 701 | diethyl_succinate                         | -5.71  | 4        |
| 702 | 1,2-diacetoxyethane                       | -6.34  | 4        |
| 704 | methyl_t-butyl_ether                      | -2.21  | 4        |
| 705 | 1,1-diethoxyethane                        | -3.28  | 4        |
| 706 | diethyl_malonate                          | -6.00  | 4        |
| 707 | 1,1-diacetoxyethane                       | -4.97  | 4        |
| 708 | methyl_trifluoroacetate                   | -1.10  | 5        |
| 711 | N,N'-dimethyl_piperazine                  | -7.58  | 4        |
| 712 | methyl_chloroacetate                      | -4.00  | 6        |
| 714 | methyl_p-nitrobenzoate                    | -6.88  | 7        |
| 716 | dimethoxymethane                          | -2.93  | 8        |
| 717 | bis(2-chloroethyl)_ether                  | -4.23  | 4        |
| 718 | m-bis(trifluoromethyl)_benzene            | 1.07   | 4        |
| 719 | benzyl_chloride                           | -1.93  | 4        |
| 720 | 2,2,2-trifluoroethanol                    | -4.31  | 9        |
| 721 | benzyl_bromide                            | -2.38  | 4        |
| 722 | 1,1,1-trifluoro-2,2,2-trimethoxyethane    | -0.80  | 5        |
| 723 | 1,1,1-trimethoxyethane                    | -4.42  | 10       |
| 724 | 2-methoxy-1,1,1-trimethoxyethane          | -5.73  | 6        |
| 725 | 2-chloro-1,1,1-trimethoxyethane           | -4.59  | 6        |
| 726 | 1,2-diethoxyethane                        | -3.54  | 8        |
| 728 | trimethoxy_methane                        | -4.42  | 9        |
| 729 | methyl_p-methoxybenzoate                  | -5.33  | 7        |
| 730 | phenyl_trifluoroethyl_ether               | -1.29  | 11       |
| 731 | N-methyl-N-(2,2,2-trifluoroethyl)-aniline | -1.92  | 12       |
| 732 | trimethoxymethylbenzene                   | -4.04  | 6        |
| 733 | N,N-dimethylbenzamide                     | -9.29  | 7        |
| 734 | N,N-dimethyl_p-nitrobenzamide             | -11.95 | 7        |
| 735 | triacetyl_glycerol                        | -8.84  | 4        |
| 736 | phenyl_formate                            | -3.82  | 13       |
| 738 | N,N-dimethyl-p-methylbenzamide            | -9.76  | 7        |
| 739 | N,N-dimethyl-p-methoxybenzamide           | -11.01 | 7        |
| 740 | diethoxymethoxybenzene                    | -5.23  | 14       |
| 743 | dimethyl_sulfoxide                        | -8.71  | 15       |
| 744 | methanesulfonyl_chloride                  | -4.87  | 16       |
| 745 | dimethyl_sulfone                          | -10.08 | 17,18,19 |
| 746 | methyl_methanesulfonate                   | -4.87  | 16       |
| 747 | dimethyl_sulfate                          | -5.10  | 20       |
| 749 | methyl_cyanoacetate                       | -6.72  | 6        |
| 750 | 3,3,3-trimethoxypropionitrile             | -6.40  | 6        |
| 751 | cyanobenzene                              | -4.10  | 21       |
| 752 | trimethyl_phosphate                       | -8.70  | 22       |

| Compound            | $T\Delta S$<br>(kcal/mol) | Num. rot. bonds |
|---------------------|---------------------------|-----------------|
| 4-nitroaniline      | 0.50                      | 1               |
| 2-ethoxyethanol     | 0.86                      | 3               |
| dimethoxymethane    | 0.65                      | 2               |
| 3-phenylpropanol    | 0.59                      | 3               |
| 2-nitrophenol       | 1.38                      | 1               |
| 1,1-diethoxyethane  | 0.59                      | 4               |
| trimethyl phosphate | 0.60                      | 3               |
| methyl formate      | 0.50                      | 1               |
| 2-nitroaniline      | 0.96                      | 1               |
| 1,2-ethanediol      | 0.63                      | 1               |
| 1,2-diacetoxyethane | 0.70                      | 5               |
| 2-methoxyethanol    | 0.83                      | 2               |
| 2-phenylethanol     | 0.71                      | 2               |
| triacetyl glycerol  | 2.33                      | 5               |
| 2-propoxyethanol    | 0.95                      | 4               |
| 2-butoxyethanol     | 0.88                      | 5               |
| N-methylpiperidine  | 1.29                      | 0               |

**TABLE 2:** Molecules with  $T\Delta S$  of hydration larger than 0.5 kcal/mol. The solute entropic component of hydration,  $T\Delta S$ , is shown, along with the number of rotatable bonds.

**TABLE 3:** Comparison of results with experimental hydration free energies (Expt. column) using the full free energy scheme ( $\Delta G$ ) and different single conformation schemes using IGB=5.

| Molecule name              | Expt.<br>(kcal/mol) | $\Delta G$<br>(kcal/mol) | Best solv.<br>(kcal/mol) | Best vac.<br>(kcal/mol) | Range<br>(kcal/mol)       |
|----------------------------|---------------------|--------------------------|--------------------------|-------------------------|---------------------------|
| 2-methylpentan-2-ol        | -3.92               | -2.67±0.00               | -2.76±0.14               | -2.38±0.08              | -3.70±0.04 to -1.70±0.05  |
| nitroethane                | -3.71               | -9.78±0.01               | -9.95±0.04               | -9.49±0.13              | -11.58±0.12 to -8.31±0.10 |
| tetrahydrofuran            | -3.47               | -1.32±0.00               | -1.33±0.05               | -1.35±0.04              | -1.97±0.05 to -0.80±0.02  |
| N-methylmorpholine         | -6.32               | -2.21±0.01               | -2.36±0.13               | -2.05±0.15              | -3.63±0.14 to -1.09±0.09  |
| 3,3-dimethylbutan-2-one    | -3.11               | -4.16±0.00               | -4.30±0.05               | -4.08±0.07              | -5.01±0.03 to -3.41±0.04  |
| acetaldehyde               | -3.50               | -6.08±0.00               | -6.18±0.03               | -5.99±0.04              | -6.92±0.03 to -5.29±0.05  |
| N-acetylpyrrolidine        | -9.80               | -7.27±0.00               | -7.37±0.12               | -7.03±0.10              | -8.63±0.06 to -6.21±0.03  |
| ethyl pentanoate           | -2.49               | -4.46±0.00               | -4.61±0.04               | -4.35±0.10              | -5.79±0.23 to -3.44±0.05  |
| di-n-butyl ether           | -0.83               | 0.47±0.00                | 0.41±0.09                | 0.65±0.07               | -0.40±0.04 to 1.23±0.04   |
| acetic acid                | -6.69               | -7.69±0.15               | -10.89±2.01              | -7.27±0.10              | -12.53±1.81 to -6.20±0.10 |
| dimethylamine              | -4.29               | -3.21±0.00               | -3.16±0.07               | -2.90±0.08              | -4.71±0.06 to -2.25±0.06  |
| 1,4-dioxane                | -5.06               | -3.55±0.00               | -3.57±0.02               | -3.45±0.04              | -4.45±0.02 to -2.62±0.07  |
| di-n-propylamine           | -3.65               | -0.40±0.02               | -0.56±0.14               | -0.31±0.11              | -1.94±0.07 to 0.71±0.07   |
| 1,1-difluoroethane         | -0.11               | -2.03±0.00               | -2.07±0.04               | -2.02±0.04              | -2.58±0.02 to -1.54±0.01  |
| 2-methoxyphenol            | -5.57               | -6.09±0.01               | -6.53±0.18               | -5.95±0.14              | -12.13±0.05 to -4.79±0.06 |
| methyl-octanoate           | -2.04               | -4.46±0.00               | -4.49±0.11               | -4.32±0.14              | -5.71±0.04 to -3.56±0.04  |
| 1-bromo-2-chloroethane     | -1.95               | -2.06±0.01               | -2.66±0.07               | -1.43±0.02              | -3.34±0.03 to -1.18±0.01  |
| hex-1-ene                  | 1.58                | 1.35±0.00                | 1.34±0.01                | 1.36±0.01               | 1.18±0.00 to 1.48±0.00    |
| m-xylene                   | -0.83               | -1.16±0.00               | -1.17±0.02               | -1.12±0.02              | -1.34±0.01 to -0.97±0.01  |
| ammonia                    | -4.29               | -7.24±0.00               | -7.49±0.02               | -6.95±0.03              | -9.48±0.05 to -5.71±0.06  |
| 1,2,4,5-tetrachlorobenzene | -1.34               | 0.47±0.00                | 0.46±0.01                | 0.46±0.01               | 0.34±0.01 to 0.62±0.01    |
| decan-1-ol                 | -3.64               | -2.66±0.00               | -2.78±0.08               | -2.69±0.07              | -3.41±0.03 to -1.78±0.09  |
| 1,1,1-trifluoropropan-2-ol | -4.16               | -5.53±0.00               | -5.78±0.15               | -4.97±0.15              | -8.80±0.06 to -3.92±0.07  |
| pent-1-ene                 | 1.68                | 1.18±0.00                | 1.17±0.01                | 1.18±0.02               | 1.01±0.01 to 1.31±0.01    |
| ethyl benzoate             | -3.64               | -6.74±0.01               | -6.71±0.09               | -6.77±0.13              | -7.88±0.04 to -5.80±0.03  |
| 1-chlorohexane             | 0.00                | 0.47±0.00                | 0.50±0.01                | 0.53±0.02               | 0.16±0.03 to 0.73±0.01    |
| 2,3,4-trimethylpentane     | 2.56                | 2.46±0.00                | 2.48±0.00                | 2.47±0.01               | 2.39±0.00 to 2.52±0.00    |
| 4-cyanophenol              | -10.17              | -9.89±0.00               | -9.72±0.06               | -9.74±0.05              | -10.95±0.02 to -9.15±0.03 |
| nonan-2-one                | -2.49               | -3.92±0.01               | -3.89±0.08               | -3.87±0.06              | -4.69±0.03 to -3.11±0.04  |
| fluorene                   | -3.35               | -4.22±0.00               | -4.24±0.03               | -4.24±0.03              | -4.58±0.02 to -3.93±0.01  |
| 4-bromotoluene             | -1.39               | -1.54±0.00               | -1.58±0.03               | -1.50±0.03              | -1.78±0.02 to -1.31±0.01  |
| ethanethiol                | -1.14               | -1.44±0.00               | -1.46±0.02               | -1.42±0.04              | -1.84±0.01 to -1.11±0.01  |

|                                 |        |             |             |             |                            |
|---------------------------------|--------|-------------|-------------|-------------|----------------------------|
| 2-methylbutan-2-ol              | -4.43  | -2.96±0.01  | -3.06±0.11  | -2.79±0.09  | -3.91±0.04 to -2.03±0.06   |
| 1-chloropropane                 | -0.33  | -0.01±0.00  | -0.05±0.02  | 0.04±0.03   | -0.28±0.01 to 0.24±0.01    |
| 1,4-dichlorobutane              | -2.32  | -1.64±0.00  | -1.73±0.10  | -1.49±0.15  | -2.65±0.05 to -0.97±0.02   |
| 1,2,3-trimethylbenzene          | -1.21  | -0.90±0.00  | -0.93±0.01  | -0.88±0.01  | -1.14±0.01 to -0.67±0.01   |
| n-pentyl acetate                | -2.51  | -4.78±0.00  | -4.79±0.03  | -4.76±0.10  | -5.95±0.08 to -3.81±0.03   |
| dimethyl sulfone                | -10.08 | -12.30±0.01 | -12.69±0.13 | -11.98±0.18 | -14.79±0.04 to -10.60±0.06 |
| 1,1,2,2-tetrachloroethane       | -2.47  | -1.81±0.01  | -2.16±0.02  | -1.28±0.02  | -2.83±0.02 to -1.03±0.01   |
| methyl p-nitrobenzoate          | -6.88  | -14.76±0.01 | -14.97±0.09 | -14.34±0.08 | -17.46±0.14 to -13.27±0.12 |
| 1,2-dichloropropane             | -1.27  | -1.41±0.01  | -1.67±0.06  | -0.97±0.31  | -2.38±0.02 to -0.33±0.01   |
| 1,2,3,4-tetrachlorobenzene      | -1.34  | 0.29±0.00   | 0.28±0.01   | 0.29±0.01   | 0.09±0.01 to 0.51±0.02     |
| ethyl butanoate                 | -2.49  | -4.66±0.01  | -4.62±0.10  | -4.54±0.09  | -5.76±0.05 to -3.66±0.07   |
| isobutylbenzene                 | 0.16   | -0.83±0.00  | -0.83±0.01  | -0.84±0.01  | -1.08±0.02 to -0.59±0.02   |
| isobutyl isobutanoate           | -1.69  | -3.87±0.00  | -3.89±0.02  | -3.56±0.06  | -5.03±0.08 to -2.97±0.05   |
| 3-chloroaniline                 | -5.82  | -6.11±0.00  | -6.09±0.06  | -6.11±0.05  | -7.44±0.09 to -5.28±0.04   |
| 3-methylbutanoic acid           | -6.09  | -6.25±0.15  | -7.93±1.57  | -6.17±0.07  | -9.50±1.36 to -4.80±0.05   |
| 4-nitroaniline                  | -10.27 | -15.01±0.00 | -15.18±0.21 | -14.51±0.12 | -17.50±0.08 to -13.54±0.08 |
| 3-methylhexane                  | 2.71   | 2.34±0.00   | 2.34±0.00   | 2.35±0.01   | 2.26±0.00 to 2.39±0.00     |
| nitrobenzene                    | -4.12  | -9.90±0.01  | -9.91±0.12  | -9.56±0.06  | -12.05±0.16 to -8.64±0.04  |
| butanoic acid                   | -6.35  | -6.47±0.00  | -6.44±0.05  | -6.33±0.08  | -8.44±0.08 to -5.19±0.04   |
| 2-ethoxyethanol                 | -6.69  | -4.43±0.01  | -4.71±0.47  | -3.97±0.17  | -9.13±0.05 to -3.06±0.06   |
| benzamide                       | -11.00 | -11.00±0.00 | -11.27±0.17 | -10.61±0.15 | -12.65±0.10 to -9.60±0.05  |
| bromobenzene                    | -1.46  | -1.96±0.00  | -1.97±0.01  | -1.98±0.02  | -2.19±0.01 to -1.74±0.01   |
| 2,6-dimethylaniline             | -5.21  | -5.42±0.00  | -5.36±0.06  | -5.20±0.07  | -6.65±0.06 to -4.56±0.03   |
| tetrahydropyran                 | -3.12  | -0.68±0.02  | -0.79±0.05  | -0.75±0.05  | -1.36±0.04 to -0.13±0.00   |
| n-butyl acetate                 | -2.64  | -4.96±0.00  | -5.09±0.06  | -4.95±0.07  | -6.11±0.07 to -4.03±0.02   |
| diisopropyl ether               | -0.53  | 0.14±0.00   | 0.15±0.07   | 0.15±0.07   | -0.84±0.05 to 0.93±0.05    |
| n-propyl formate                | -2.48  | -6.38±0.00  | -6.62±0.06  | -6.28±0.09  | -7.49±0.06 to -5.41±0.04   |
| ethyl propanoate                | -2.68  | -4.96±0.00  | -4.98±0.07  | -4.81±0.07  | -5.97±0.04 to -3.97±0.03   |
| p-dibromobenzene                | -2.30  | -1.50±0.00  | -1.51±0.04  | -1.52±0.02  | -1.78±0.01 to -1.23±0.01   |
| n-propyl butyrate               | -2.28  | -4.32±0.00  | -4.37±0.06  | -4.14±0.09  | -5.42±0.03 to -3.44±0.03   |
| 1,1,1-trichloroethane           | -0.19  | -0.06±0.00  | -0.04±0.01  | -0.07±0.01  | -0.36±0.02 to 0.20±0.01    |
| 2-iodophenol                    | -6.20  | -5.38±0.01  | -5.24±0.11  | -5.17±0.03  | -10.03±0.03 to -4.40±0.03  |
| 2,3-dimethylbuta-1,3-diene      | 0.40   | 0.37±0.00   | 0.34±0.02   | 0.27±0.01   | 0.05±0.01 to 0.70±0.01     |
| pyrrolidine                     | -5.48  | -1.99±0.01  | -2.19±0.09  | -1.79±0.12  | -3.38±0.03 to -1.00±0.06   |
| 2-methyl-but-2-ene              | 1.31   | 1.17±0.00   | 1.18±0.02   | 1.18±0.01   | 1.03±0.01 to 1.33±0.01     |
| 2,3-dimethylpentane             | 2.52   | 2.32±0.00   | 2.32±0.00   | 2.32±0.00   | 2.24±0.00 to 2.37±0.00     |
| p-cresol                        | -6.13  | -6.14±0.00  | -6.04±0.03  | -6.06±0.17  | -7.11±0.03 to -5.46±0.03   |
| 2-chloro-1,1,1-trimethoxyethane | -4.59  | -4.08±0.01  | -4.61±0.33  | -3.40±0.07  | -7.05±0.13 to -2.52±0.07   |
| 1-bromo-2-methylpropane         | -0.03  | -0.12±0.01  | -0.15±0.03  | -0.16±0.02  | -0.41±0.02 to 0.14±0.01    |
| 4-cyanopyridine                 | -6.02  | -8.31±0.00  | -8.35±0.03  | -8.22±0.06  | -9.16±0.05 to -7.54±0.02   |
| toluene                         | -0.89  | -1.60±0.00  | -1.62±0.01  | -1.61±0.01  | -1.75±0.01 to -1.45±0.00   |
| 2,2-dimethylpentane             | 2.88   | 2.33±0.00   | 2.34±0.01   | 2.34±0.01   | 2.25±0.00 to 2.38±0.00     |
| 1,2,4-trimethylbenzene          | -0.86  | -0.79±0.00  | -0.79±0.02  | -0.80±0.02  | -1.01±0.01 to -0.57±0.01   |
| 1-chloro-2,2,2-trifluoroethane  | 0.06   | -3.13±0.00  | -3.22±0.03  | -3.11±0.04  | -4.06±0.04 to -2.49±0.05   |
| 3-nitrophenol                   | -9.62  | -13.95±0.01 | -13.97±0.14 | -13.73±0.10 | -16.28±0.11 to -12.73±0.04 |
| dimethoxymethane                | -2.93  | -3.75±0.02  | -4.53±0.73  | -3.09±0.09  | -7.85±0.10 to -2.51±0.03   |
| non-1-ene                       | 2.06   | 1.81±0.00   | 1.80±0.02   | 1.86±0.01   | 1.64±0.00 to 1.95±0.01     |
| propionaldehyde                 | -3.43  | -5.48±0.00  | -5.50±0.05  | -5.36±0.07  | -6.37±0.06 to -4.76±0.04   |
| cyclohexanol                    | -5.46  | -3.16±0.00  | -3.07±0.17  | -2.86±0.13  | -4.11±0.04 to -2.37±0.01   |
| 2,3-dimethylpyridine            | -4.82  | -4.39±0.00  | -4.37±0.05  | -4.31±0.09  | -5.28±0.03 to -3.70±0.03   |
| 3-methyl-1h-indole              | -5.88  | -5.93±0.00  | -6.04±0.02  | -5.96±0.02  | -6.33±0.01 to -5.46±0.03   |
| 2-methylpropene                 | 1.16   | 0.97±0.00   | 0.97±0.01   | 0.97±0.01   | 0.82±0.00 to 1.09±0.00     |
| diethyl malonate                | -6.00  | -9.41±0.01  | -9.61±0.24  | -8.90±0.15  | -11.88±0.04 to -8.06±0.07  |
| 1-naphthylamine                 | -7.28  | -8.04±0.00  | -8.17±0.06  | -7.84±0.10  | -9.31±0.05 to -7.13±0.05   |
| Z-1,2-dichloroethene            | -1.17  | -1.24±0.00  | -1.25±0.02  | -1.21±0.02  | -1.55±0.01 to -0.95±0.02   |
| but-1-ene                       | 1.38   | 0.99±0.00   | 0.99±0.02   | 1.00±0.01   | 0.83±0.01 to 1.13±0.00     |
| trans-1,4-dimethylcyclohexane   | 2.11   | 2.39±0.00   | 2.39±0.00   | 2.40±0.01   | 2.32±0.00 to 2.45±0.00     |
| 4-n-propylphenol                | -5.90  | -5.59±0.00  | -5.42±0.05  | -5.44±0.04  | -6.59±0.01 to -4.92±0.02   |
| 2-methoxyethanamine             | -6.55  | -5.87±0.01  | -5.76±0.07  | -5.58±0.13  | -9.84±0.05 to -4.60±0.02   |
| dimethyl sulfoxide              | -8.71  | -8.49±0.00  | -8.81±0.11  | -8.22±0.10  | -9.92±0.03 to -7.20±0.03   |
| n-butylbenzene                  | -0.40  | -0.88±0.00  | -0.86±0.01  | -0.87±0.01  | -1.07±0.00 to -0.67±0.02   |

|                                |       |             |             |             |                            |
|--------------------------------|-------|-------------|-------------|-------------|----------------------------|
| 3-phenylpropanol               | -6.92 | -6.09±0.02  | -6.66±0.11  | -4.49±0.10  | -7.98±0.11 to -4.09±0.04   |
| propan-2-ol                    | -4.74 | -3.65±0.00  | -4.00±0.06  | -3.32±0.10  | -4.73±0.02 to -2.79±0.04   |
| 1-nitropropane                 | -3.34 | -9.17±0.01  | -9.40±0.16  | -8.80±0.17  | -10.90±0.05 to -7.80±0.08  |
| m-bis(trifluoromethyl) benzene | 1.07  | -5.33±0.00  | -5.46±0.06  | -5.37±0.04  | -6.24±0.06 to -4.64±0.01   |
| 3-methylbut-1-ene              | 1.82  | 1.17±0.00   | 1.17±0.01   | 1.16±0.01   | 1.01±0.01 to 1.32±0.00     |
| 1-bromoheptane                 | 0.34  | 0.37±0.00   | 0.35±0.04   | 0.39±0.04   | 0.07±0.01 to 0.65±0.03     |
| butanone                       | -3.71 | -5.24±0.00  | -5.25±0.06  | -5.26±0.05  | -6.15±0.04 to -4.41±0.07   |
| 1,1,1-trimethoxyethane         | -4.42 | -3.59±0.00  | -3.64±0.10  | -3.19±0.20  | -6.17±0.16 to -2.22±0.05   |
| 3-ethylpyridine                | -4.59 | -4.45±0.00  | -4.46±0.04  | -4.44±0.08  | -5.19±0.02 to -3.76±0.03   |
| anisole                        | -2.45 | -3.71±0.00  | -3.91±0.09  | -3.67±0.09  | -4.43±0.03 to -3.16±0.03   |
| propane                        | 1.96  | 1.78±0.00   | 1.78±0.00   | 1.78±0.00   | 1.75±0.00 to 1.80±0.00     |
| 3-chlorophenol                 | -6.62 | -6.05±0.00  | -6.90±0.03  | -5.78±0.05  | -7.15±0.01 to -5.22±0.01   |
| dichloromethane                | -1.31 | -1.29±0.00  | -1.32±0.01  | -1.29±0.02  | -1.66±0.02 to -0.94±0.01   |
| 2,5-dimethylphenol             | -5.91 | -5.12±0.02  | -5.49±0.42  | -4.69±0.03  | -6.84±0.01 to -4.16±0.02   |
| biphenyl                       | -2.66 | -4.22±0.00  | -4.28±0.07  | -4.27±0.03  | -4.75±0.01 to -3.54±0.02   |
| nonan-1-ol                     | -3.88 | -2.79±0.00  | -3.07±0.08  | -2.63±0.21  | -3.92±0.08 to -1.70±0.08   |
| methylcyclohexane              | 1.70  | 2.19±0.00   | 2.20±0.01   | 2.20±0.01   | 2.11±0.00 to 2.26±0.00     |
| 3,4-dimethylphenol             | -6.50 | -5.72±0.01  | -5.71±0.19  | -5.56±0.02  | -6.70±0.03 to -5.01±0.04   |
| tert-butylbenzene              | -0.44 | -0.86±0.00  | -0.88±0.02  | -0.82±0.02  | -1.08±0.01 to -0.61±0.02   |
| diethoxymethoxybenzene         | -5.23 | -4.75±0.00  | -4.83±0.18  | -4.19±0.20  | -8.78±0.10 to -3.21±0.09   |
| pent-1-yne                     | 0.01  | 0.15±0.00   | 0.17±0.02   | 0.19±0.03   | -0.06±0.01 to 0.33±0.01    |
| n-butylamine                   | -4.24 | -3.73±0.00  | -3.79±0.14  | -3.43±0.16  | -5.49±0.04 to -2.44±0.07   |
| 1-chloropentane                | -0.07 | 0.32±0.00   | 0.29±0.03   | 0.31±0.04   | 0.06±0.01 to 0.57±0.01     |
| iodoethane                     | -0.74 | -3.04±0.00  | -3.07±0.01  | -3.04±0.02  | -3.44±0.01 to -2.54±0.02   |
| 1,2-dibromoethane              | -2.33 | -2.22±0.00  | -2.69±0.05  | -1.65±0.01  | -3.46±0.04 to -1.42±0.02   |
| 2-nitrophenol                  | -4.58 | -10.32±0.03 | -11.47±1.40 | -8.85±0.11  | -17.00±0.05 to -8.30±0.06  |
| undecan-2-one                  | -2.15 | -3.59±0.00  | -3.69±0.10  | -3.59±0.10  | -4.42±0.02 to -2.81±0.03   |
| ethylbenzene                   | -0.79 | -1.29±0.00  | -1.31±0.01  | -1.28±0.02  | -1.47±0.01 to -1.12±0.00   |
| 2,5-dimethylpyridine           | -4.72 | -4.28±0.00  | -4.38±0.09  | -4.21±0.13  | -5.13±0.07 to -3.50±0.04   |
| n-octylamine                   | -3.65 | -2.83±0.00  | -2.83±0.17  | -2.65±0.22  | -4.60±0.08 to -1.46±0.11   |
| o-xylene                       | -0.90 | -1.25±0.00  | -1.28±0.02  | -1.25±0.01  | -1.45±0.01 to -1.07±0.01   |
| 4-tert-butylphenol             | -5.91 | -5.36±0.01  | -5.66±0.23  | -5.17±0.05  | -6.34±0.02 to -4.59±0.04   |
| benzyl chloride                | -1.93 | -2.93±0.00  | -3.05±0.03  | -3.01±0.04  | -3.38±0.01 to -2.45±0.01   |
| n-butanethiol                  | -0.99 | -0.99±0.00  | -0.95±0.04  | -0.89±0.05  | -1.40±0.02 to -0.59±0.02   |
| piperidine                     | -5.11 | -1.48±0.04  | -1.56±0.17  | -1.41±0.18  | -3.05±0.21 to -0.57±0.03   |
| n-octane                       | 2.88  | 2.51±0.00   | 2.53±0.01   | 2.53±0.01   | 2.42±0.00 to 2.58±0.00     |
| 2,2,5-trimethylhexane          | 2.93  | 2.64±0.00   | 2.65±0.01   | 2.64±0.01   | 2.57±0.00 to 2.70±0.00     |
| acetophenone                   | -4.58 | -7.07±0.00  | -7.07±0.07  | -6.96±0.06  | -8.00±0.04 to -6.17±0.04   |
| 2-bromo-2-methylpropane        | 0.84  | -0.58±0.00  | -0.52±0.03  | -0.63±0.02  | -0.84±0.01 to -0.31±0.02   |
| trimethylamine                 | -3.20 | -1.22±0.01  | -1.38±0.08  | -0.93±0.11  | -2.45±0.02 to -0.28±0.06   |
| pentan-3-one                   | -3.41 | -4.31±0.00  | -4.38±0.05  | -4.30±0.04  | -5.12±0.02 to -3.48±0.03   |
| n-propylbenzene                | -0.53 | -1.06±0.00  | -1.06±0.01  | -1.08±0.02  | -1.27±0.01 to -0.87±0.01   |
| cyclohexylamine                | -4.59 | -2.93±0.01  | -3.20±0.12  | -2.66±0.11  | -4.70±0.06 to -1.64±0.06   |
| butan-1-ol                     | -4.72 | -3.63±0.00  | -3.79±0.17  | -3.58±0.22  | -4.83±0.05 to -2.58±0.03   |
| 1,1-diethoxyethane             | -3.28 | -1.25±0.01  | -0.96±0.23  | -0.74±0.11  | -4.46±0.13 to -0.08±0.03   |
| hexanal                        | -2.81 | -4.88±0.00  | -4.92±0.07  | -4.74±0.06  | -5.79±0.02 to -4.18±0.01   |
| E-hept-2-ene                   | 1.68  | 1.62±0.00   | 1.62±0.02   | 1.64±0.01   | 1.46±0.01 to 1.75±0.01     |
| chlorobenzene                  | -1.12 | -1.60±0.00  | -1.61±0.02  | -1.62±0.01  | -1.79±0.00 to -1.39±0.02   |
| isobutyl acetate               | -2.36 | -4.87±0.00  | -4.82±0.05  | -4.70±0.06  | -6.00±0.06 to -3.94±0.03   |
| 2-chlorotoluene                | -1.14 | -1.30±0.00  | -1.32±0.02  | -1.27±0.02  | -1.53±0.01 to -1.08±0.01   |
| 1,2-dimethoxyethane            | -4.84 | -3.74±0.01  | -4.66±0.26  | -3.02±0.09  | -6.26±0.06 to -2.33±0.06   |
| iodomethane                    | -0.89 | -3.22±0.00  | -3.30±0.01  | -3.25±0.01  | -3.64±0.01 to -2.75±0.01   |
| anthracene                     | -3.95 | -4.91±0.00  | -4.94±0.00  | -4.91±0.03  | -5.13±0.02 to -4.70±0.01   |
| hexafluoropropene              | -3.76 | -1.92±0.00  | -1.87±0.04  | -1.82±0.04  | -2.50±0.02 to -1.42±0.02   |
| n-butane                       | 2.07  | 1.91±0.00   | 1.92±0.00   | 1.92±0.00   | 1.85±0.00 to 1.95±0.00     |
| 2,4-dimethylpentane            | 2.83  | 2.33±0.00   | 2.34±0.00   | 2.33±0.01   | 2.28±0.00 to 2.39±0.00     |
| 2-nitropropane                 | -3.13 | -8.74±0.01  | -8.76±0.09  | -8.49±0.07  | -10.52±0.09 to -7.37±0.14  |
| n-heptylamine                  | -3.79 | -3.02±0.01  | -3.44±0.22  | -2.91±0.22  | -4.76±0.12 to -1.79±0.04   |
| trimethyl phosphate            | -8.70 | -13.47±0.01 | -14.55±0.51 | -12.47±0.34 | -20.02±0.21 to -11.24±0.07 |
| 1-bromohexane                  | 0.18  | 0.23±0.00   | 0.17±0.03   | 0.24±0.04   | -0.06±0.01 to 0.52±0.02    |
| hept-1-ene                     | 1.66  | 1.50±0.00   | 1.47±0.02   | 1.52±0.01   | 1.34±0.01 to 1.63±0.00     |

|                                         |       |             |             |             |                            |
|-----------------------------------------|-------|-------------|-------------|-------------|----------------------------|
| dibromomethane                          | -1.96 | -0.72±0.00  | -0.75±0.01  | -0.74±0.00  | -1.04±0.01 to -0.43±0.02   |
| pentan-3-ol                             | -4.35 | -2.83±0.00  | -3.19±0.12  | -2.54±0.16  | -4.10±0.03 to -1.83±0.07   |
| n-propylamine                           | -4.39 | -3.77±0.00  | -3.97±0.16  | -3.43±0.06  | -5.70±0.10 to -2.63±0.03   |
| n-decane                                | 3.16  | 2.82±0.00   | 2.83±0.01   | 2.83±0.01   | 2.70±0.01 to 2.89±0.00     |
| methyl formate                          | -2.78 | -9.58±0.05  | -12.84±0.07 | -7.68±0.10  | -13.98±0.04 to -7.16±0.03  |
| teflurane                               | 0.50  | -3.65±0.00  | -3.67±0.06  | -3.63±0.07  | -4.52±0.04 to -2.89±0.05   |
| 1,2-diethoxyethane                      | -3.54 | -2.48±0.01  | -3.17±0.16  | -1.65±0.08  | -4.97±0.06 to -1.04±0.05   |
| 4-chloro-3-methylphenol                 | -6.79 | -5.84±0.00  | -5.97±0.19  | -5.58±0.04  | -6.82±0.02 to -5.09±0.03   |
| 2-iodopropane                           | -0.46 | -2.77±0.00  | -2.81±0.05  | -2.83±0.02  | -3.14±0.01 to -2.31±0.02   |
| methyl trifluoroacetate                 | -1.10 | -5.93±0.00  | -5.88±0.06  | -5.80±0.07  | -6.94±0.04 to -5.03±0.04   |
| o-toluidine                             | -5.53 | -6.12±0.00  | -6.13±0.08  | -6.07±0.10  | -7.40±0.12 to -5.30±0.03   |
| E-hex-2-enal                            | -3.68 | -5.70±0.00  | -5.76±0.08  | -5.56±0.05  | -6.57±0.03 to -4.99±0.02   |
| 2-methylthiophene                       | -1.38 | -0.96±0.00  | -0.97±0.02  | -0.99±0.01  | -1.13±0.01 to -0.79±0.01   |
| buta-1,3-diene                          | 0.61  | -0.08±0.02  | -0.06±0.01  | -0.05±0.01  | -0.33±0.05 to 0.13±0.01    |
| methyl pentanoate                       | -2.56 | -4.94±0.00  | -5.03±0.15  | -4.84±0.10  | -6.10±0.05 to -4.09±0.03   |
| 2-ethyltoluene                          | -1.04 | -0.95±0.00  | -0.93±0.01  | -0.93±0.03  | -1.16±0.01 to -0.73±0.01   |
| chlorofluoromethane                     | -0.77 | -2.63±0.00  | -2.65±0.02  | -2.61±0.02  | -3.23±0.06 to -2.14±0.02   |
| 1,4-dimethylnaphthalene                 | -2.82 | -2.75±0.00  | -2.70±0.04  | -2.76±0.02  | -3.00±0.01 to -2.50±0.01   |
| 1-iodohexane                            | 0.08  | -2.14±0.00  | -2.19±0.04  | -2.17±0.04  | -2.62±0.02 to -1.63±0.02   |
| octan-1-ol                              | -4.09 | -2.96±0.00  | -3.00±0.24  | -2.65±0.10  | -4.05±0.04 to -1.81±0.05   |
| phenyl formate                          | -3.82 | -8.99±0.02  | -9.42±0.16  | -8.71±0.18  | -10.70±0.25 to -7.56±0.08  |
| benzyl alcohol                          | -6.62 | -6.18±0.01  | -6.61±0.53  | -5.72±0.14  | -8.93±0.04 to -4.92±0.03   |
| 1,3-dichlorobenzene                     | -0.98 | -0.94±0.00  | -0.94±0.02  | -0.96±0.02  | -1.15±0.00 to -0.72±0.01   |
| octan-2-one                             | -2.88 | -4.08±0.00  | -4.13±0.09  | -4.15±0.12  | -5.00±0.05 to -3.25±0.03   |
| cyclopentanone                          | -4.70 | -4.60±0.00  | -4.64±0.08  | -4.51±0.09  | -5.37±0.04 to -3.90±0.03   |
| sec-butylbenzene                        | -0.45 | -0.76±0.00  | -0.75±0.01  | -0.77±0.02  | -1.02±0.01 to -0.51±0.01   |
| 1-bromopentane                          | -0.10 | 0.08±0.00   | 0.03±0.05   | 0.06±0.05   | -0.25±0.02 to 0.34±0.01    |
| iodobenzene                             | -1.74 | -2.34±0.00  | -2.34±0.02  | -2.38±0.01  | -2.55±0.01 to -2.10±0.00   |
| N-methyl-N-2,2,2-trifluoroethyl-aniline | -1.92 | -6.01±0.01  | -6.42±0.38  | -5.53±0.19  | -8.35±0.08 to -4.41±0.06   |
| n-hexylbenzene                          | -0.04 | -0.54±0.00  | -0.59±0.02  | -0.58±0.03  | -0.77±0.01 to -0.25±0.02   |
| 2-chloroaniline                         | -4.91 | -6.07±0.01  | -6.14±0.06  | -5.99±0.08  | -7.91±0.08 to -5.06±0.04   |
| propan-1-ol                             | -4.85 | -3.84±0.00  | -4.38±0.06  | -3.50±0.06  | -4.95±0.03 to -2.86±0.03   |
| isoflurane                              | 0.10  | -6.59±0.01  | -6.77±0.14  | -6.29±0.17  | -9.96±0.07 to -5.26±0.08   |
| p-toluidine                             | -5.57 | -6.30±0.00  | -6.24±0.09  | -6.33±0.08  | -7.72±0.12 to -5.44±0.03   |
| isopropyl acetate                       | -2.64 | -5.03±0.00  | -5.06±0.14  | -4.73±0.12  | -6.12±0.02 to -4.06±0.07   |
| 3-cyanophenol                           | -9.65 | -9.34±0.00  | -9.31±0.13  | -9.34±0.13  | -10.23±0.02 to -8.77±0.02  |
| 2-bromopropane                          | -0.48 | -0.52±0.00  | -0.52±0.03  | -0.48±0.03  | -0.78±0.01 to -0.27±0.01   |
| butyraldehyde                           | -3.18 | -5.23±0.00  | -5.37±0.08  | -5.18±0.09  | -6.09±0.03 to -4.41±0.04   |
| methyl acetate                          | -3.13 | -6.03±0.00  | -6.09±0.07  | -5.87±0.05  | -7.24±0.07 to -5.16±0.02   |
| 1-methyl-pyrrole                        | -2.89 | -3.30±0.00  | -3.34±0.02  | -3.26±0.02  | -3.57±0.01 to -3.03±0.01   |
| pyrene                                  | -4.52 | -5.70±0.00  | -5.77±0.03  | -5.74±0.02  | -5.91±0.01 to -5.49±0.01   |
| 2-methylpyridine                        | -4.63 | -4.95±0.00  | -4.93±0.05  | -4.97±0.14  | -5.80±0.04 to -4.12±0.07   |
| heptanal                                | -2.67 | -4.72±0.00  | -4.67±0.10  | -4.50±0.05  | -5.57±0.03 to -3.92±0.07   |
| pentachloroethane                       | -1.39 | -0.57±0.01  | -0.62±0.01  | -0.56±0.03  | -0.95±0.02 to -0.23±0.01   |
| n-hexyl acetate                         | -2.26 | -4.62±0.00  | -4.57±0.15  | -4.39±0.05  | -5.79±0.09 to -3.73±0.05   |
| ethyl formate                           | -2.56 | -6.74±0.00  | -7.01±0.11  | -6.65±0.13  | -7.94±0.07 to -5.81±0.02   |
| 4-ethylphenol                           | -6.13 | -5.82±0.01  | -5.99±0.23  | -5.80±0.20  | -6.78±0.01 to -5.13±0.03   |
| 2,4-dimethylpyridine                    | -4.86 | -4.54±0.00  | -4.58±0.09  | -4.45±0.06  | -5.37±0.04 to -3.75±0.02   |
| methyl methanesulfonate                 | -4.87 | -12.20±0.01 | -13.46±0.32 | -11.72±0.09 | -16.41±0.22 to -10.47±0.04 |
| 1,1,1,2-tetrachloroethane               | -1.28 | -0.97±0.00  | -0.89±0.04  | -0.91±0.04  | -1.36±0.02 to -0.59±0.02   |
| tribromomethane                         | -2.13 | 0.41±0.00   | 0.40±0.01   | 0.41±0.01   | 0.25±0.01 to 0.59±0.01     |
| hex-1-yne                               | 0.29  | 0.32±0.00   | 0.31±0.02   | 0.33±0.01   | 0.11±0.01 to 0.49±0.01     |
| 3-hydroxybenzaldehyde                   | -9.50 | -12.15±0.01 | -12.31±0.22 | -12.00±0.07 | -13.94±0.02 to -11.00±0.07 |
| 3-chloroprop-1-ene                      | -0.57 | -0.76±0.00  | -0.72±0.10  | -0.65±0.04  | -1.22±0.01 to -0.34±0.01   |
| n-heptane                               | 2.67  | 2.36±0.00   | 2.38±0.00   | 2.37±0.01   | 2.28±0.01 to 2.42±0.00     |
| ethylamine                              | -4.50 | -4.15±0.01  | -4.15±0.10  | -3.77±0.10  | -5.90±0.05 to -2.89±0.08   |
| 4-isopropyltoluene                      | -0.68 | -0.56±0.00  | -0.55±0.02  | -0.55±0.01  | -0.81±0.02 to -0.33±0.01   |
| 2-chloro-2-methylpropane                | 1.09  | -0.11±0.00  | -0.17±0.02  | -0.08±0.02  | -0.40±0.01 to 0.17±0.01    |
| diethyl sulfide                         | -1.46 | -0.67±0.00  | -0.64±0.03  | -0.57±0.03  | -1.16±0.03 to -0.24±0.01   |
| n-propyl propanoate                     | -2.44 | -4.62±0.00  | -4.60±0.13  | -4.62±0.06  | -5.70±0.08 to -3.62±0.07   |
| 2,3-dimethylphenol                      | -6.16 | -5.67±0.00  | -5.63±0.03  | -5.66±0.10  | -6.33±0.03 to -5.05±0.03   |

|                                        |        |             |             |             |                            |
|----------------------------------------|--------|-------------|-------------|-------------|----------------------------|
| 4-chlorophenol                         | -7.03  | -6.19±0.01  | -6.38±0.20  | -6.00±0.06  | -7.16±0.01 to -5.53±0.03   |
| 1-bromobutane                          | -0.40  | -0.07±0.00  | -0.08±0.02  | 0.01±0.01   | -0.41±0.02 to 0.20±0.00    |
| dimethyl sulfate                       | -5.10  | -13.87±0.01 | -14.22±0.24 | -13.53±0.13 | -17.27±0.14 to -12.26±0.05 |
| n-pentyl propanoate                    | -2.11  | -4.21±0.00  | -4.34±0.05  | -3.82±0.05  | -5.34±0.04 to -3.29±0.02   |
| 3-ethylphenol                          | -6.25  | -5.81±0.00  | -6.09±0.20  | -5.65±0.04  | -6.76±0.01 to -5.06±0.04   |
| 3-nitroaniline                         | -8.84  | -13.83±0.00 | -13.83±0.11 | -13.55±0.17 | -16.36±0.07 to -12.54±0.04 |
| propanone                              | -3.80  | -5.30±0.00  | -5.36±0.05  | -5.30±0.07  | -6.16±0.03 to -4.51±0.05   |
| tetrafluoromethane                     | 3.12   | -2.27±0.00  | -2.25±0.01  | -2.22±0.01  | -2.60±0.01 to -1.96±0.01   |
| di-n-propyl sulfide                    | -1.28  | -0.14±0.00  | -0.15±0.04  | -0.11±0.05  | -0.68±0.01 to 0.31±0.02    |
| 1-methyl-imidazole                     | -8.41  | -7.42±0.00  | -7.49±0.07  | -7.49±0.08  | -8.33±0.03 to -6.64±0.04   |
| ethane                                 | 1.83   | 1.66±0.00   | 1.66±0.00   | 1.66±0.00   | 1.64±0.00 to 1.68±0.00     |
| 2-chloropyridine                       | -4.39  | -5.52±0.00  | -5.51±0.08  | -5.53±0.04  | -6.36±0.05 to -4.74±0.04   |
| 4-hydroxybenzaldehyde                  | -8.83  | -12.37±0.01 | -12.38±0.05 | -12.07±0.07 | -13.75±0.06 to -11.27±0.04 |
| halothane                              | -0.11  | -2.46±0.00  | -2.55±0.04  | -2.40±0.05  | -3.14±0.02 to -1.84±0.03   |
| 2-ethylpyrazine                        | -5.45  | -8.28±0.00  | -8.21±0.10  | -8.25±0.08  | -9.41±0.05 to -7.33±0.03   |
| benzotrifluoride                       | -4.21  | -5.18±0.00  | -5.19±0.02  | -5.16±0.02  | -5.49±0.02 to -4.88±0.01   |
| diiodomethane                          | -2.49  | -4.54±0.00  | -4.54±0.02  | -4.53±0.02  | -5.07±0.02 to -4.09±0.03   |
| 2-chlorophenol                         | -4.55  | -4.86±0.01  | -4.80±0.05  | -4.44±0.07  | -8.92±0.02 to -3.88±0.04   |
| 2-methoxyaniline                       | -6.12  | -7.71±0.00  | -7.80±0.21  | -7.34±0.16  | -10.20±0.12 to -6.35±0.06  |
| chloroethane                           | -0.63  | -0.23±0.00  | -0.24±0.01  | -0.25±0.01  | -0.48±0.01 to -0.01±0.01   |
| 3,5-dimethylpyridine                   | -4.84  | -4.16±0.00  | -4.18±0.04  | -4.25±0.08  | -4.90±0.04 to -3.50±0.05   |
| methyl trimethylacetate                | -2.40  | -4.65±0.00  | -4.53±0.08  | -4.44±0.08  | -5.68±0.06 to -3.80±0.03   |
| 4-methylbenzaldehyde                   | -4.27  | -7.39±0.00  | -7.42±0.08  | -7.29±0.06  | -8.28±0.03 to -6.65±0.05   |
| benzaldehyde                           | -4.02  | -7.79±0.00  | -7.78±0.11  | -7.66±0.12  | -8.70±0.03 to -7.04±0.03   |
| 1,4-dichlorobenzene                    | -1.01  | -1.06±0.00  | -1.07±0.02  | -1.06±0.02  | -1.32±0.01 to -0.79±0.02   |
| n-pentylamine                          | -4.09  | -3.34±0.01  | -3.30±0.08  | -3.05±0.09  | -5.16±0.13 to -2.10±0.08   |
| 2-methylpentane                        | 2.51   | 2.20±0.00   | 2.21±0.00   | 2.21±0.00   | 2.12±0.01 to 2.24±0.00     |
| pentan-1-ol                            | -4.57  | -3.44±0.00  | -3.46±0.22  | -2.89±0.06  | -4.53±0.02 to -2.46±0.06   |
| cyclopentanol                          | -5.49  | -3.32±0.00  | -3.25±0.12  | -3.22±0.05  | -4.28±0.05 to -2.43±0.05   |
| 1,2-dichloroethane                     | -1.79  | -1.75±0.01  | -2.11±0.04  | -1.31±0.22  | -2.88±0.03 to -0.72±0.02   |
| 1,3-dichloropropane                    | -1.89  | -1.93±0.00  | -2.02±0.12  | -1.73±0.04  | -3.56±0.05 to -1.29±0.03   |
| 1-chloroheptane                        | 0.29   | 0.66±0.00   | 0.70±0.03   | 0.67±0.03   | 0.37±0.00 to 0.91±0.01     |
| 1,3,5-trichlorobenzene                 | -0.78  | -0.00±0.00  | -0.00±0.00  | 0.00±0.01   | -0.08±0.00 to 0.07±0.00    |
| 3-methoxyaniline                       | -7.29  | -8.37±0.00  | -8.68±0.12  | -8.19±0.09  | -9.90±0.06 to -7.37±0.04   |
| hexanoic acid                          | -6.21  | -6.27±0.19  | -7.60±1.44  | -5.83±0.05  | -9.61±1.43 to -4.77±0.09   |
| chlorodifluoromethane                  | -0.50  | -3.53±0.00  | -3.60±0.03  | -3.52±0.05  | -4.29±0.03 to -2.82±0.01   |
| 1,3-dimethylnaphthalene                | -2.47  | -2.69±0.00  | -2.69±0.03  | -2.71±0.02  | -2.94±0.02 to -2.46±0.01   |
| N,N-dimethyl p-nitrobenzamide          | -11.95 | -16.38±0.04 | -16.59±0.32 | -15.90±0.35 | -19.02±0.14 to -14.59±0.09 |
| 1-bromopropane                         | -0.56  | -0.26±0.00  | -0.21±0.03  | -0.24±0.04  | -0.57±0.01 to 0.02±0.02    |
| 2,4-dimethylpentan-3-one               | -2.74  | -3.65±0.00  | -3.66±0.10  | -3.64±0.07  | -4.50±0.03 to -2.84±0.03   |
| ethyl phenyl ether                     | -2.22  | -3.16±0.00  | -3.13±0.10  | -3.04±0.05  | -3.92±0.02 to -2.58±0.02   |
| isobutyraldehyde                       | -2.86  | -5.03±0.00  | -5.12±0.07  | -5.00±0.05  | -5.94±0.04 to -4.26±0.02   |
| styrene                                | -1.24  | -2.43±0.00  | -2.45±0.01  | -2.42±0.02  | -2.64±0.01 to -2.23±0.01   |
| dimethyl-disulfide                     | -1.83  | -1.29±0.00  | -1.30±0.05  | -1.32±0.03  | -1.87±0.02 to -0.76±0.02   |
| 1H-imidazole                           | -9.63  | -9.30±0.00  | -9.27±0.05  | -9.28±0.04  | -10.30±0.04 to -8.47±0.05  |
| 4-methylpentan-2-one                   | -3.05  | -4.34±0.00  | -4.60±0.08  | -4.29±0.07  | -5.27±0.06 to -3.53±0.03   |
| tetrachloromethane                     | 0.08   | 1.05±0.00   | 1.06±0.00   | 1.06±0.00   | 0.97±0.00 to 1.12±0.00     |
| diethylamine                           | -4.07  | -1.20±0.02  | -1.21±0.19  | -1.15±0.16  | -2.66±0.08 to -0.16±0.03   |
| propene                                | 1.32   | 0.79±0.00   | 0.79±0.01   | 0.78±0.00   | 0.67±0.00 to 0.91±0.01     |
| 1,1-dichloroethane                     | -0.84  | -0.83±0.00  | -0.89±0.02  | -0.83±0.02  | -1.21±0.01 to -0.47±0.02   |
| 1,1,1-trifluoro-2,2,2-trimethoxyethane | -0.80  | -4.44±0.01  | -4.51±0.13  | -4.41±0.23  | -6.80±0.08 to -3.20±0.03   |
| methyl-propyl-ether                    | -1.66  | -0.86±0.00  | -0.81±0.09  | -0.75±0.05  | -1.58±0.02 to -0.24±0.04   |
| 2,5-dimethyltetrahydrofuran            | -2.92  | -0.45±0.00  | -0.55±0.07  | -0.43±0.05  | -1.25±0.03 to 0.25±0.04    |
| triethylamine                          | -3.22  | 1.33±0.01   | 1.49±0.09   | 1.44±0.14   | -0.09±0.04 to 2.33±0.04    |
| benzotrifluoride                       | -0.25  | -3.33±0.00  | -3.33±0.03  | -3.32±0.07  | -3.89±0.02 to -2.85±0.04   |
| 2,6-dimethylnaphthalene                | -2.63  | -2.64±0.00  | -2.64±0.02  | -2.67±0.02  | -2.87±0.01 to -2.42±0.01   |
| fluorobenzene                          | -0.80  | -1.71±0.00  | -1.75±0.02  | -1.69±0.02  | -1.91±0.00 to -1.50±0.01   |
| 2-naphthol                             | -8.11  | -8.04±0.01  | -8.15±0.12  | -8.03±0.13  | -8.69±0.01 to -7.37±0.04   |
| methyl cyanoacetate                    | -6.72  | -10.21±0.01 | -10.65±0.15 | -9.93±0.08  | -11.96±0.05 to -9.07±0.07  |
| hexan-1-ol                             | -4.40  | -3.27±0.01  | -3.53±0.19  | -3.39±0.18  | -4.38±0.05 to -2.20±0.07   |
| n-butylacetamide                       | -9.31  | -8.40±0.01  | -8.39±0.23  | -7.96±0.17  | -10.11±0.07 to -7.07±0.06  |

|                                  |        |             |             |             |                            |
|----------------------------------|--------|-------------|-------------|-------------|----------------------------|
| 2-nitroaniline                   | -7.37  | -12.75±0.04 | -13.60±0.36 | -11.55±0.10 | -18.27±0.17 to -10.65±0.07 |
| aniline                          | -5.49  | -6.83±0.00  | -6.90±0.08  | -6.65±0.05  | -8.06±0.06 to -6.05±0.04   |
| 4-ethyltoluene                   | -0.95  | -0.84±0.00  | -0.86±0.02  | -0.83±0.04  | -1.04±0.01 to -0.63±0.01   |
| n-pentylbenzene                  | -0.23  | -0.71±0.00  | -0.73±0.01  | -0.73±0.03  | -0.93±0.01 to -0.39±0.02   |
| naphthalene                      | -2.40  | -3.62±0.00  | -3.66±0.02  | -3.62±0.01  | -3.80±0.01 to -3.44±0.01   |
| nitromethane                     | -4.02  | -11.09±0.01 | -11.30±0.14 | -10.94±0.09 | -13.04±0.06 to -9.72±0.11  |
| benzyl bromide                   | -2.38  | -3.27±0.00  | -3.30±0.02  | -3.29±0.03  | -3.68±0.03 to -2.81±0.02   |
| 1,2-ethanediol                   | -9.30  | -8.57±0.00  | -8.49±0.12  | -7.77±0.08  | -13.49±0.09 to -6.99±0.04  |
| trichloromethane                 | -1.08  | -0.76±0.00  | -0.79±0.02  | -0.74±0.01  | -1.12±0.02 to -0.39±0.02   |
| 3,3-dimethylpentane              | 2.56   | 2.30±0.00   | 2.32±0.01   | 2.31±0.00   | 2.24±0.00 to 2.35±0.00     |
| N,N-dimethyl-p-methylbenzamide   | -9.76  | -8.22±0.02  | -8.55±0.26  | -8.13±0.05  | -9.92±0.10 to -6.97±0.02   |
| Z-pent-2-ene                     | 1.31   | 1.14±0.00   | 1.14±0.01   | 1.14±0.01   | 0.99±0.01 to 1.27±0.01     |
| diethyl ether                    | -1.59  | -0.59±0.00  | -0.77±0.02  | -0.41±0.09  | -1.33±0.02 to 0.10±0.04    |
| 4-methoxyaniline                 | -7.48  | -8.32±0.00  | -8.50±0.09  | -8.10±0.05  | -9.82±0.06 to -7.31±0.08   |
| 3-methylpentane                  | 2.51   | 2.18±0.00   | 2.19±0.01   | 2.18±0.01   | 2.10±0.01 to 2.23±0.00     |
| 1-naphthol                       | -7.67  | -7.74±0.00  | -8.93±0.02  | -7.03±0.08  | -9.26±0.02 to -6.42±0.08   |
| methyl p-methoxybenzoate         | -5.33  | -8.84±0.00  | -9.08±0.15  | -8.69±0.15  | -10.34±0.08 to -7.70±0.09  |
| hexan-3-ol                       | -4.06  | -2.70±0.00  | -2.86±0.09  | -2.44±0.11  | -3.78±0.05 to -1.77±0.07   |
| hydrazine                        | -9.30  | -10.04±0.01 | -10.32±0.09 | -9.72±0.10  | -13.82±0.20 to -8.43±0.14  |
| 2-methoxy-1,1,1-trimethoxyethane | -5.73  | -6.15±0.01  | -6.44±0.24  | -5.23±0.28  | -10.58±0.16 to -4.13±0.10  |
| phenyl trifluoroethyl ether      | -1.29  | -6.95±0.02  | -7.78±0.23  | -6.21±0.17  | -9.93±0.08 to -4.83±0.08   |
| pentanenitrile                   | -3.52  | -3.63±0.00  | -3.69±0.02  | -3.63±0.02  | -3.94±0.01 to -3.30±0.02   |
| 3,4-dimethylpyridine             | -5.22  | -4.48±0.00  | -4.55±0.05  | -4.51±0.09  | -5.33±0.06 to -3.77±0.03   |
| o-cresol                         | -5.87  | -6.09±0.00  | -6.21±0.05  | -6.01±0.05  | -6.70±0.02 to -5.47±0.04   |
| acetonitrile                     | -3.88  | -4.74±0.00  | -4.76±0.01  | -4.73±0.01  | -5.08±0.02 to -4.41±0.02   |
| cyclohexane                      | 1.23   | 2.00±0.00   | 2.00±0.00   | 2.02±0.01   | 1.94±0.00 to 2.06±0.00     |
| methyl chloroacetate             | -4.00  | -6.43±0.00  | -6.63±0.21  | -6.40±0.17  | -7.79±0.08 to -5.23±0.06   |
| 2-methyltetrahydrofuran          | -3.30  | -0.89±0.00  | -0.94±0.05  | -0.97±0.05  | -1.66±0.03 to -0.26±0.03   |
| isoamyl formate                  | -2.13  | -5.92±0.00  | -5.94±0.09  | -5.90±0.11  | -7.16±0.07 to -4.89±0.07   |
| bromotrifluoromethane            | 1.79   | -1.63±0.00  | -1.63±0.01  | -1.61±0.03  | -2.12±0.02 to -1.26±0.02   |
| n-pentane                        | 2.32   | 2.06±0.00   | 2.07±0.01   | 2.07±0.01   | 1.99±0.00 to 2.10±0.00     |
| 1,2,3,5-tetrachlorobenzene       | -1.62  | 0.58±0.00   | 0.57±0.02   | 0.58±0.01   | 0.47±0.00 to 0.69±0.00     |
| methylcyclopentane               | 1.59   | 2.04±0.00   | 2.04±0.01   | 2.05±0.00   | 1.97±0.00 to 2.09±0.00     |
| cyclohexanone                    | -4.91  | -4.46±0.01  | -4.45±0.07  | -4.51±0.11  | -5.22±0.06 to -3.72±0.03   |
| 4-methylpyridine                 | -4.93  | -5.04±0.00  | -5.00±0.03  | -5.01±0.04  | -5.83±0.05 to -4.37±0.03   |
| 1,2-diacetoxyethane              | -6.34  | -11.69±0.01 | -11.96±0.32 | -11.02±0.05 | -14.27±0.13 to -9.96±0.10  |
| 2-methylbuta-1,3-diene           | 0.68   | 0.09±0.00   | 0.05±0.01   | 0.11±0.02   | -0.16±0.01 to 0.35±0.02    |
| dimethyl sulfide                 | -1.61  | -0.75±0.00  | -0.75±0.02  | -0.72±0.04  | -1.17±0.02 to -0.40±0.02   |
| heptan-4-one                     | -2.92  | -3.87±0.00  | -3.96±0.07  | -3.73±0.10  | -4.70±0.02 to -3.10±0.02   |
| 3-methoxyphenol                  | -7.66  | -8.15±0.01  | -8.34±0.17  | -7.95±0.13  | -9.45±0.03 to -7.11±0.05   |
| quinoline                        | -5.72  | -6.21±0.00  | -6.13±0.05  | -6.29±0.04  | -7.04±0.03 to -5.50±0.02   |
| trimethoxy methane               | -4.42  | -4.37±0.01  | -4.70±0.35  | -3.81±0.10  | -9.19±0.23 to -2.73±0.06   |
| 2-methylhexane                   | 2.93   | 2.35±0.00   | 2.37±0.00   | 2.36±0.01   | 2.26±0.01 to 2.39±0.00     |
| formaldehyde                     | -2.75  | -6.92±0.00  | -6.98±0.01  | -6.87±0.01  | -7.79±0.04 to -6.15±0.08   |
| acenaphthene                     | -3.15  | -3.28±0.00  | -3.31±0.03  | -3.32±0.03  | -3.56±0.02 to -3.02±0.01   |
| methyl benzoate                  | -3.92  | -7.24±0.00  | -7.41±0.10  | -7.03±0.07  | -8.60±0.07 to -6.25±0.03   |
| azetidine                        | -5.56  | -3.12±0.02  | -3.29±0.16  | -3.19±0.13  | -4.34±0.06 to -2.06±0.05   |
| methanethiol                     | -1.24  | -1.50±0.00  | -1.50±0.03  | -1.42±0.01  | -1.93±0.01 to -1.13±0.02   |
| oct-1-yne                        | 0.71   | 0.62±0.00   | 0.65±0.02   | 0.63±0.02   | 0.42±0.01 to 0.81±0.02     |
| 1-chlorobutane                   | -0.16  | 0.21±0.00   | 0.19±0.03   | 0.24±0.02   | -0.10±0.01 to 0.46±0.01    |
| 3-chloropyridine                 | -4.01  | -4.49±0.00  | -4.63±0.07  | -4.46±0.06  | -5.28±0.04 to -3.86±0.04   |
| 2-fluorophenol                   | -5.29  | -5.03±0.00  | -5.05±0.06  | -4.77±0.10  | -9.30±0.02 to -3.95±0.09   |
| methane                          | 1.99   | 1.53±0.00   | 1.53±0.00   | 1.53±0.00   | 1.53±0.00 to 1.53±0.00     |
| N-methylacetamide                | -10.00 | -9.39±0.00  | -9.54±0.07  | -8.84±0.12  | -11.11±0.03 to -7.92±0.06  |
| cyclohexene                      | 0.37   | 1.01±0.00   | 1.01±0.01   | 1.00±0.02   | 0.85±0.01 to 1.15±0.01     |
| morpholine                       | -7.17  | -4.42±0.06  | -4.33±0.09  | -4.18±0.13  | -6.06±0.17 to -3.50±0.06   |
| 1-nitrobutane                    | -3.09  | -8.85±0.01  | -8.97±0.23  | -8.64±0.10  | -10.61±0.08 to -7.47±0.10  |
| methanesulfonyl chloride         | -4.87  | -12.54±0.00 | -12.81±0.19 | -12.33±0.10 | -14.78±0.08 to -10.99±0.08 |
| 1-iodopentane                    | -0.14  | -2.30±0.00  | -2.27±0.05  | -2.33±0.04  | -2.80±0.03 to -1.84±0.01   |
| methyl ethyl ether               | -2.10  | -1.15±0.00  | -1.16±0.06  | -0.99±0.04  | -1.85±0.02 to -0.56±0.02   |
| N,N-dimethyl-p-methoxybenzamide  | -11.01 | -10.07±0.02 | -10.35±0.07 | -9.94±0.21  | -11.84±0.16 to -8.69±0.06  |

|                                       |        |             |             |             |                            |
|---------------------------------------|--------|-------------|-------------|-------------|----------------------------|
| 2-isobutylpyrazine                    | -5.04  | -7.65±0.01  | -7.86±0.09  | -7.47±0.07  | -8.84±0.07 to -6.71±0.05   |
| methyl hexanoate                      | -2.49  | -4.78±0.00  | -4.87±0.09  | -4.76±0.10  | -5.88±0.06 to -3.90±0.04   |
| 2,3-dimethylnaphthalene               | -2.78  | -2.72±0.00  | -2.74±0.01  | -2.78±0.02  | -2.94±0.01 to -2.51±0.01   |
| n-propanethiol                        | -1.06  | -1.11±0.00  | -1.20±0.05  | -1.07±0.05  | -1.61±0.02 to -0.72±0.02   |
| methanol                              | -5.10  | -4.74±0.00  | -4.71±0.07  | -4.49±0.04  | -5.60±0.05 to -4.02±0.02   |
| 3-acetylpyridine                      | -8.26  | -10.65±0.21 | -10.60±0.24 | -10.50±0.17 | -11.97±0.19 to -9.58±0.27  |
| 4-methoxyacetophenone                 | -4.40  | -8.60±0.00  | -8.71±0.12  | -8.65±0.09  | -9.73±0.04 to -7.60±0.04   |
| 2,6-dimethylpyridine                  | -4.59  | -4.41±0.00  | -4.41±0.12  | -4.41±0.06  | -5.48±0.04 to -3.55±0.03   |
| 2,2-dimethylbutane                    | 2.51   | 2.15±0.00   | 2.16±0.00   | 2.15±0.00   | 2.08±0.00 to 2.20±0.00     |
| 1,1,2-trichloroethane                 | -1.99  | -1.62±0.02  | -2.43±0.04  | -1.46±0.23  | -2.85±0.03 to -0.72±0.01   |
| 3-formylpyridine                      | -7.10  | -11.30±0.00 | -11.46±0.06 | -11.11±0.13 | -12.61±0.05 to -10.23±0.05 |
| 1-iodopropane                         | -0.53  | -2.66±0.00  | -2.65±0.01  | -2.65±0.02  | -3.13±0.02 to -2.23±0.02   |
| cycloheptanol                         | -5.48  | -2.81±0.00  | -3.07±0.17  | -2.58±0.17  | -3.98±0.03 to -1.60±0.04   |
| butanenitrile                         | -3.64  | -3.83±0.00  | -3.84±0.02  | -3.82±0.03  | -4.18±0.02 to -3.46±0.02   |
| 4-fluorophenol                        | -6.19  | -6.34±0.01  | -6.39±0.16  | -6.11±0.04  | -7.38±0.02 to -5.63±0.03   |
| 4-methylpentan-2-ol                   | -3.73  | -2.76±0.01  | -2.94±0.14  | -2.53±0.07  | -3.94±0.02 to -1.67±0.04   |
| isobutyl formate                      | -2.22  | -6.07±0.01  | -6.21±0.12  | -6.03±0.06  | -7.30±0.03 to -4.92±0.09   |
| 4-methyl-1h-imidazole                 | -10.27 | -9.00±0.01  | -9.14±0.05  | -8.98±0.04  | -10.00±0.02 to -8.04±0.03  |
| 3-methylheptane                       | 2.97   | 2.51±0.00   | 2.52±0.01   | 2.51±0.01   | 2.41±0.01 to 2.57±0.01     |
| 3-methylpyridine                      | -4.77  | -4.80±0.00  | -4.84±0.05  | -4.81±0.06  | -5.59±0.03 to -4.19±0.01   |
| decan-2-one                           | -2.34  | -3.75±0.00  | -3.66±0.08  | -3.62±0.10  | -4.63±0.02 to -2.92±0.07   |
| 3-methylbutan-1-ol                    | -4.42  | -3.41±0.00  | -3.77±0.07  | -3.14±0.10  | -4.52±0.05 to -2.22±0.06   |
| 2,4-dimethylphenol                    | -6.01  | -5.60±0.00  | -5.68±0.06  | -5.51±0.05  | -6.23±0.02 to -4.90±0.03   |
| methyl cyclopropanecarboxylate        | -4.10  | -5.81±0.00  | -5.71±0.18  | -5.61±0.08  | -8.92±0.16 to -4.60±0.02   |
| 2-naphthylamine                       | -7.47  | -8.22±0.00  | -8.29±0.06  | -8.18±0.12  | -9.54±0.06 to -7.37±0.04   |
| 2-methoxyethanol                      | -6.76  | -5.22±0.01  | -5.04±0.21  | -4.51±0.11  | -9.84±0.08 to -3.83±0.04   |
| 2-chlorobutane                        | 0.00   | 0.10±0.00   | 0.04±0.04   | 0.17±0.03   | -0.20±0.01 to 0.37±0.01    |
| methyl-tert-butyl ether               | -2.21  | -0.66±0.00  | -0.80±0.11  | -0.50±0.08  | -1.49±0.03 to 0.03±0.04    |
| 3-cyanopyridine                       | -6.75  | -8.33±0.00  | -8.39±0.10  | -8.31±0.07  | -9.22±0.05 to -7.64±0.02   |
| methyl butanoate                      | -2.83  | -5.21±0.00  | -5.30±0.06  | -5.08±0.10  | -6.32±0.06 to -4.27±0.06   |
| octanal                               | -2.29  | -4.57±0.00  | -4.61±0.04  | -4.44±0.12  | -5.46±0.03 to -3.79±0.03   |
| cyclopentane                          | 1.20   | 1.87±0.00   | 1.87±0.00   | 1.87±0.00   | 1.81±0.00 to 1.92±0.00     |
| 2-phenylethanol                       | -6.79  | -6.04±0.01  | -6.24±0.37  | -5.11±0.16  | -8.78±0.08 to -4.42±0.04   |
| bromomethane                          | -0.82  | -0.47±0.00  | -0.48±0.00  | -0.48±0.00  | -0.69±0.01 to -0.22±0.01   |
| tetrachloroethene                     | 0.10   | 2.17±0.00   | 2.17±0.00   | 2.17±0.00   | 2.16±0.00 to 2.18±0.00     |
| 1-bromooctane                         | 0.52   | 0.53±0.00   | 0.48±0.02   | 0.50±0.04   | 0.21±0.01 to 0.79±0.01     |
| 1,1,2-trichloro-1,2,2-trifluoroethane | 1.77   | -0.95±0.00  | -0.93±0.03  | -0.97±0.04  | -1.41±0.02 to -0.57±0.01   |
| pyridine                              | -4.69  | -5.43±0.00  | -5.47±0.03  | -5.41±0.06  | -6.19±0.01 to -4.77±0.02   |
| 4-ethylpyridine                       | -4.73  | -4.72±0.00  | -4.69±0.05  | -4.69±0.08  | -5.54±0.04 to -4.02±0.03   |
| alpha-methylstyrene                   | -1.24  | -2.16±0.00  | -2.19±0.02  | -2.17±0.02  | -2.41±0.01 to -1.91±0.01   |
| isopropyl formate                     | -2.02  | -6.23±0.00  | -6.30±0.09  | -6.03±0.10  | -7.45±0.03 to -5.22±0.04   |
| methyl t-butyl ether                  | -2.21  | -0.67±0.00  | -0.86±0.06  | -0.75±0.05  | -1.46±0.02 to 0.08±0.05    |
| N,N-dimethylformamide                 | -7.81  | -8.49±0.00  | -8.55±0.17  | -8.06±0.15  | -9.90±0.03 to -7.38±0.08   |
| heptan-1-ol                           | -4.21  | -3.11±0.00  | -3.36±0.15  | -2.98±0.15  | -4.27±0.06 to -2.06±0.04   |
| 2,2-dimethylpropane                   | 2.51   | 2.00±0.00   | 2.01±0.00   | 2.00±0.00   | 1.95±0.00 to 2.05±0.00     |
| 1,3,5-trimethylbenzene                | -0.90  | -0.69±0.00  | -0.73±0.02  | -0.69±0.02  | -0.92±0.01 to -0.49±0.01   |
| methylamine                           | -4.55  | -5.13±0.01  | -5.37±0.12  | -4.84±0.10  | -6.83±0.02 to -3.98±0.04   |
| 2-methylpropan-1-ol                   | -4.50  | -3.45±0.01  | -3.70±0.15  | -3.16±0.17  | -4.59±0.04 to -2.39±0.03   |
| propyne                               | -0.48  | -0.34±0.00  | -0.34±0.01  | -0.34±0.01  | -0.49±0.01 to -0.18±0.00   |
| 2,2,4-trimethylpentane                | 2.89   | 2.46±0.00   | 2.46±0.01   | 2.47±0.01   | 2.38±0.00 to 2.52±0.00     |
| cyclopropane                          | 0.75   | 1.34±0.00   | 1.34±0.00   | 1.34±0.00   | 1.28±0.00 to 1.39±0.00     |
| pentan-2-ol                           | -4.39  | -3.05±0.00  | -3.08±0.14  | -2.97±0.07  | -3.96±0.02 to -2.20±0.04   |
| 2-methylbutan-1-ol                    | -4.42  | -3.19±0.01  | -3.65±0.12  | -2.73±0.08  | -4.38±0.04 to -2.09±0.05   |
| 1-iodobutane                          | -0.25  | -2.44±0.00  | -2.49±0.04  | -2.44±0.04  | -2.92±0.02 to -2.01±0.01   |
| 2-ethylpyridine                       | -4.33  | -4.65±0.00  | -4.71±0.06  | -4.57±0.08  | -5.56±0.03 to -3.86±0.05   |
| propanenitrile                        | -3.84  | -4.12±0.00  | -4.12±0.03  | -4.13±0.02  | -4.45±0.03 to -3.82±0.01   |
| N,N-dimethyl piperazine               | -7.58  | -0.74±0.00  | -0.74±0.10  | -0.63±0.24  | -2.57±0.13 to 0.71±0.06    |
| triacetyl glycerol                    | -8.84  | -16.02±0.40 | -20.20±0.88 | -11.86±0.24 | -35.58±1.80 to -12.61±0.71 |
| n-nonane                              | 3.13   | 2.67±0.00   | 2.68±0.01   | 2.69±0.01   | 2.54±0.01 to 2.72±0.00     |
| benzene                               | -0.86  | -2.04±0.00  | -2.05±0.01  | -2.05±0.01  | -2.12±0.00 to -1.94±0.01   |
| 1-methylcyclohexene                   | 0.67   | 1.33±0.00   | 1.33±0.01   | 1.35±0.02   | 1.16±0.01 to 1.51±0.01     |



|                             |        |             |             |             |                            |
|-----------------------------|--------|-------------|-------------|-------------|----------------------------|
| 1-iodoheptane               | 0.27   | -2.00±0.00  | -1.98±0.03  | -2.01±0.02  | -2.51±0.03 to -1.44±0.02   |
| isoamyl acetate             | -2.21  | -5.34±0.00  | -5.30±0.19  | -4.76±0.08  | -10.67±0.04 to -4.13±0.04  |
| phenanthrene                | -3.88  | -4.97±0.00  | -5.00±0.02  | -5.01±0.02  | -5.21±0.01 to -4.72±0.01   |
| 2-methylpent-1-ene          | 1.47   | 1.37±0.00   | 1.37±0.01   | 1.36±0.02   | 1.18±0.01 to 1.54±0.00     |
| cis-1,2-dimethylcyclohexane | 1.58   | 2.33±0.00   | 2.34±0.01   | 2.34±0.01   | 2.26±0.01 to 2.39±0.00     |
| cyclopentene                | 0.56   | 0.69±0.00   | 0.67±0.00   | 0.70±0.01   | 0.57±0.01 to 0.82±0.01     |
| n-propylcyclopentane        | 2.13   | 2.38±0.00   | 2.39±0.01   | 2.39±0.00   | 2.29±0.01 to 2.44±0.00     |
| 3,5-dimethylphenol          | -6.27  | -5.65±0.00  | -6.12±0.20  | -5.48±0.05  | -6.66±0.02 to -4.92±0.02   |
| bromoethane                 | -0.74  | -0.51±0.00  | -0.51±0.01  | -0.49±0.01  | -0.74±0.01 to -0.27±0.00   |
| chloromethane               | -0.55  | -0.37±0.00  | -0.36±0.01  | -0.35±0.01  | -0.59±0.01 to -0.15±0.00   |
| hexan-2-one                 | -3.28  | -4.37±0.00  | -4.45±0.08  | -4.43±0.10  | -5.18±0.02 to -3.48±0.03   |
| phenyl methyl sulfide       | -2.73  | -2.13±0.00  | -2.04±0.02  | -2.12±0.04  | -2.70±0.03 to -1.76±0.02   |
| 2-propoxyethanol            | -6.40  | -4.06±0.00  | -3.94±0.17  | -3.53±0.05  | -8.58±0.16 to -2.63±0.03   |
| 2,6-dimethylphenol          | -5.26  | -5.19±0.01  | -5.07±0.18  | -4.89±0.09  | -6.38±0.01 to -4.27±0.02   |
| methyl cyclopropyl ketone   | -4.61  | -5.35±0.00  | -5.58±0.13  | -5.26±0.04  | -6.52±0.05 to -4.31±0.09   |
| diisopropylamine            | -3.22  | 0.12±0.01   | -0.20±0.15  | 0.50±0.10   | -1.60±0.09 to 1.30±0.04    |
| n-propyl acetate            | -2.79  | -5.18±0.00  | -5.33±0.10  | -5.13±0.14  | -6.29±0.06 to -4.23±0.04   |
| hydrogen sulfide            | -0.70  | -2.62±0.00  | -2.64±0.00  | -2.59±0.00  | -3.30±0.02 to -2.09±0.02   |
| methyl cyclohexyl ketone    | -3.90  | -3.88±0.01  | -4.02±0.07  | -3.85±0.08  | -4.75±0.03 to -3.14±0.02   |
| 2-methylbutane              | 2.38   | 2.03±0.00   | 2.04±0.00   | 2.03±0.00   | 1.97±0.01 to 2.08±0.00     |
| methyl ethyl sulfide        | -1.50  | -0.73±0.00  | -0.72±0.03  | -0.75±0.04  | -1.17±0.02 to -0.35±0.02   |
| butan-2-ol                  | -4.62  | -3.25±0.00  | -3.34±0.16  | -3.00±0.09  | -4.36±0.03 to -2.27±0.04   |
| ethanamide                  | -9.71  | -9.76±0.00  | -9.97±0.13  | -9.67±0.14  | -11.47±0.06 to -8.30±0.10  |
| 1,1-dichloroethene          | 0.25   | 0.38±0.00   | 0.37±0.01   | 0.37±0.01   | 0.17±0.01 to 0.58±0.02     |
| trimethoxymethylbenzene     | -4.04  | -5.67±0.03  | -5.85±0.18  | -5.21±0.09  | -7.44±0.05 to -4.34±0.09   |
| diethyl succinate           | -5.71  | -11.33±0.02 | -12.09±0.34 | -10.55±0.14 | -15.10±0.06 to -9.45±0.10  |
| 4-formylpyridine            | -7.00  | -11.05±0.00 | -11.16±0.06 | -10.89±0.13 | -12.33±0.05 to -10.02±0.04 |
| 4-nitrophenol               | -10.64 | -14.45±0.01 | -14.40±0.13 | -13.90±0.15 | -17.19±0.05 to -12.97±0.08 |
| 2-methylpropan-2-ol         | -4.47  | -3.28±0.00  | -3.31±0.14  | -3.20±0.08  | -4.22±0.05 to -2.49±0.04   |
| 1-ethylnaphthalene          | -2.40  | -2.85±0.00  | -2.86±0.03  | -2.85±0.02  | -3.09±0.01 to -2.61±0.01   |
| ethanol                     | -5.00  | -4.21±0.00  | -4.46±0.05  | -4.19±0.15  | -5.16±0.03 to -3.40±0.01   |
| propanoic acid              | -6.46  | -7.14±0.33  | -8.51±1.49  | -6.51±0.13  | -10.20±1.44 to -5.58±0.14  |
| methoxyflurane              | -1.12  | -2.94±0.02  | -2.95±0.10  | -2.82±0.04  | -5.84±0.29 to -2.14±0.04   |
| di-n-butylamine             | -3.24  | 0.07±0.03   | 0.17±0.09   | 0.62±0.16   | -1.77±0.13 to 1.35±0.06    |
| methyl-isopropyl-ether      | -2.01  | -0.84±0.00  | -0.87±0.07  | -0.63±0.10  | -1.63±0.05 to -0.16±0.05   |
| diethyl disulfide           | -1.64  | -1.30±0.00  | -1.36±0.09  | -1.27±0.05  | -1.91±0.04 to -0.75±0.02   |
| 4-acetylpyridine            | -7.62  | -10.24±0.00 | -10.29±0.02 | -10.06±0.08 | -11.46±0.05 to -9.29±0.04  |
| nonanal                     | -2.07  | -4.41±0.00  | -4.57±0.10  | -4.33±0.16  | -5.34±0.02 to -3.58±0.04   |
| N-methylaniline             | -4.69  | -5.44±0.00  | -5.57±0.11  | -5.29±0.07  | -6.41±0.03 to -4.55±0.04   |
| nonan-5-one                 | -2.64  | -3.51±0.00  | -3.52±0.05  | -3.36±0.06  | -4.39±0.03 to -2.73±0.02   |
| ethyl acetate               | -2.94  | -5.51±0.00  | -5.43±0.14  | -5.44±0.10  | -6.63±0.04 to -4.67±0.04   |
| E-oct-2-enal                | -3.43  | -5.36±0.00  | -5.34±0.05  | -5.37±0.04  | -6.17±0.04 to -4.61±0.05   |
| indane                      | -1.46  | -1.26±0.00  | -1.28±0.02  | -1.25±0.02  | -1.48±0.02 to -1.02±0.01   |
| 1,1-diacetoxyethane         | -4.97  | -10.58±0.07 | -10.72±0.12 | -10.03±0.17 | -13.10±0.15 to -9.31±0.05  |
| thiophenol                  | -2.55  | -2.57±0.00  | -2.63±0.06  | -2.53±0.03  | -3.04±0.01 to -2.18±0.03   |
| 4-bromophenol               | -7.13  | -6.51±0.00  | -6.62±0.23  | -6.27±0.04  | -7.48±0.02 to -5.80±0.03   |
| n-hexylamine                | -3.95  | -3.16±0.00  | -3.37±0.16  | -2.95±0.10  | -4.93±0.07 to -1.96±0.05   |
| p-xylene                    | -0.80  | -1.15±0.00  | -1.14±0.01  | -1.18±0.01  | -1.35±0.01 to -0.95±0.01   |
| pentan-2-one                | -3.52  | -4.56±0.00  | -4.55±0.06  | -4.46±0.07  | -5.48±0.03 to -3.78±0.07   |
| triethyl phosphate          | -7.54  | -11.02±0.01 | -11.51±0.29 | -9.49±0.65  | -17.26±0.21 to -8.41±0.25  |
| E-but-2-enal                | -4.22  | -6.18±0.00  | -6.23±0.06  | -6.14±0.05  | -7.02±0.02 to -5.43±0.05   |
| heptan-2-one                | -3.04  | -4.23±0.00  | -4.40±0.06  | -4.10±0.06  | -5.12±0.02 to -3.44±0.03   |
| N-methylpiperazine          | -7.77  | -3.11±0.00  | -3.26±0.08  | -2.79±0.05  | -4.76±0.12 to -1.80±0.07   |
| 3-methyl-but-1-ene          | 1.83   | 1.17±0.00   | 1.19±0.01   | 1.16±0.01   | 1.01±0.01 to 1.32±0.01     |
| 1-nitropentane              | -2.82  | -8.64±0.00  | -8.80±0.08  | -8.64±0.10  | -10.47±0.09 to -7.32±0.04  |
| bis(2-chloroethyl) ether    | -4.23  | -3.54±0.01  | -4.88±0.41  | -2.21±0.05  | -7.06±0.07 to -1.82±0.05   |
| 1,2,4-trichlorobenzene      | -1.12  | -0.39±0.00  | -0.41±0.01  | -0.40±0.01  | -0.60±0.01 to -0.18±0.01   |
| E-1,2-dichloroethene        | -0.78  | -0.21±0.00  | -0.21±0.00  | -0.21±0.00  | -0.32±0.01 to -0.11±0.00   |
| 3-methylbutan-2-one         | -3.24  | -4.37±0.00  | -4.16±0.09  | -4.34±0.06  | -5.28±0.01 to -3.65±0.01   |
| chloroethylene              | -0.59  | -0.36±0.00  | -0.37±0.01  | -0.34±0.01  | -0.61±0.01 to -0.12±0.01   |
| 2-methylpropane             | 2.32   | 1.89±0.00   | 1.89±0.00   | 1.90±0.00   | 1.85±0.00 to 1.93±0.00     |

|                               |       |            |            |            |                           |
|-------------------------------|-------|------------|------------|------------|---------------------------|
| N,N-dimethylaniline           | -3.45 | -3.64±0.00 | -3.90±0.14 | -3.67±0.18 | -4.84±0.04 to -2.57±0.04  |
| 2-methylpyrazine              | -5.51 | -8.79±0.00 | -8.86±0.08 | -8.70±0.13 | -9.95±0.06 to -7.93±0.03  |
| pentanoic acid                | -6.16 | -6.29±0.03 | -9.30±1.80 | -6.01±0.13 | -10.99±1.66 to -4.85±0.06 |
| ethyl hexanoate               | -2.23 | -4.29±0.00 | -4.46±0.13 | -4.16±0.08 | -5.45±0.03 to -3.34±0.04  |
| 3,3,3-trimethoxypropionitrile | -6.40 | -7.37±0.01 | -8.01±0.45 | -6.35±0.19 | -11.11±0.11 to -5.72±0.05 |
| phenol                        | -6.61 | -6.62±0.01 | -6.66±0.18 | -6.38±0.06 | -7.57±0.01 to -5.80±0.02  |
| cyclohepta-1,3,5-triene       | -0.99 | -1.40±0.01 | -1.43±0.03 | -1.35±0.03 | -1.82±0.03 to -1.06±0.01  |
| methyl propanoate             | -2.93 | -5.45±0.00 | -5.44±0.08 | -5.29±0.08 | -6.67±0.04 to -4.55±0.05  |
| 1,2-dichlorobenzene           | -1.36 | -1.21±0.00 | -1.21±0.02 | -1.20±0.02 | -1.43±0.01 to -0.98±0.02  |
| 2-methylpentan-3-ol           | -3.88 | -2.45±0.01 | -2.73±0.13 | -2.28±0.18 | -3.70±0.03 to -1.49±0.04  |
| oct-1-ene                     | 1.92  | 1.65±0.00  | 1.62±0.02  | 1.65±0.02  | 1.47±0.01 to 1.82±0.01    |
| 2-nitrotoluene                | -3.58 | -9.72±0.00 | -9.82±0.20 | -9.25±0.22 | -11.45±0.06 to -8.31±0.06 |
| di-isopropyl sulfide          | -1.21 | -0.58±0.01 | -0.46±0.04 | -0.44±0.05 | -1.17±0.02 to -0.01±0.04  |
| 2,3-dimethylbutane            | 2.34  | 2.16±0.00  | 2.16±0.00  | 2.16±0.01  | 2.10±0.00 to 2.20±0.00    |
| thiophene                     | -1.42 | -1.35±0.00 | -1.36±0.00 | -1.35±0.01 | -1.47±0.00 to -1.24±0.00  |
| piperazine                    | -7.40 | -5.58±0.03 | -5.81±0.14 | -5.32±0.17 | -7.61±0.18 to -4.31±0.05  |
| prop-2-en-1-ol                | -5.03 | -4.52±0.01 | -4.50±0.19 | -4.14±0.08 | -6.55±0.04 to -3.48±0.04  |
| isopropylbenzene              | -0.30 | -1.02±0.00 | -1.05±0.01 | -1.03±0.02 | -1.22±0.01 to -0.79±0.01  |
| 2,2,2-trifluoroethanol        | -4.31 | -6.99±0.01 | -7.37±0.47 | -6.64±0.21 | -10.30±0.11 to -5.09±0.10 |
| n-pentylcyclopentane          | 2.55  | 2.69±0.00  | 2.71±0.01  | 2.70±0.01  | 2.59±0.01 to 2.78±0.01    |
| 2-butoxyethanol               | -6.25 | -4.03±0.01 | -3.91±0.19 | -3.59±0.11 | -9.00±0.04 to -2.55±0.05  |
| N,N-dimethylbenzamide         | -9.29 | -8.73±0.01 | -8.58±0.17 | -8.42±0.07 | -10.40±0.06 to -7.54±0.03 |
| but-1-yne                     | -0.16 | -0.05±0.00 | -0.05±0.02 | -0.06±0.01 | -0.20±0.00 to 0.12±0.01   |
| N-methylpiperidine            | -3.88 | 0.64±0.03  | 0.57±0.08  | 0.68±0.22  | -0.58±0.06 to 1.70±0.08   |
| 4-methylacetophenone          | -4.70 | -6.67±0.00 | -6.56±0.10 | -6.64±0.06 | -7.61±0.05 to -5.92±0.03  |
| fluoromethane                 | -0.22 | -0.92±0.00 | -0.92±0.01 | -0.91±0.01 | -1.19±0.02 to -0.64±0.01  |
| 1,2,3-trichlorobenzene        | -1.24 | -0.54±0.00 | -0.53±0.00 | -0.53±0.01 | -0.78±0.02 to -0.29±0.01  |
| 2-chloropropane               | -0.25 | -0.12±0.00 | -0.13±0.01 | -0.12±0.02 | -0.39±0.01 to 0.13±0.01   |
| 4-chloroaniline               | -5.90 | -6.35±0.00 | -6.28±0.06 | -6.11±0.09 | -7.60±0.05 to -5.52±0.01  |
| hexa-1,5-diene                | 1.01  | 0.53±0.00  | 0.48±0.05  | 0.54±0.03  | 0.15±0.01 to 0.73±0.01    |
| 2-methylbut-2-ene             | 1.31  | 1.17±0.00  | 1.17±0.01  | 1.17±0.01  | 1.04±0.01 to 1.31±0.00    |
| di-n-propyl ether             | -1.16 | 0.04±0.00  | 0.10±0.06  | 0.04±0.06  | -0.80±0.02 to 0.82±0.05   |
| m-cresol                      | -5.49 | -6.13±0.01 | -6.21±0.23 | -5.94±0.03 | -7.06±0.01 to -5.38±0.02  |
| trichloroethene               | -0.44 | 0.49±0.00  | 0.50±0.01  | 0.47±0.00  | 0.36±0.01 to 0.65±0.01    |
| ethene                        | 1.28  | 0.62±0.00  | 0.62±0.01  | 0.62±0.01  | 0.48±0.02 to 0.72±0.01    |
| n-hexane                      | 2.48  | 2.21±0.00  | 2.21±0.01  | 2.22±0.00  | 2.12±0.01 to 2.25±0.00    |
| hept-1-yne                    | 0.60  | 0.47±0.00  | 0.48±0.02  | 0.48±0.01  | 0.24±0.01 to 0.64±0.01    |
| 1-methylnaphthalene           | -2.44 | -3.19±0.00 | -3.22±0.02 | -3.19±0.01 | -3.44±0.02 to -2.97±0.01  |
| dimethyl ether                | -1.91 | -1.68±0.00 | -1.73±0.05 | -1.54±0.05 | -2.33±0.04 to -1.10±0.02  |
| methyl cyclohexanecarboxylate | -3.30 | -4.31±0.05 | -4.22±0.08 | -4.16±0.11 | -5.45±0.06 to -3.39±0.07  |
| pentanal                      | -3.03 | -5.04±0.01 | -5.17±0.05 | -4.93±0.05 | -5.89±0.05 to -4.21±0.04  |
| 1H-pyrrole                    | -4.78 | -5.09±0.00 | -5.13±0.02 | -5.09±0.02 | -5.35±0.02 to -4.80±0.01  |
| penta-1,4-diene               | 0.93  | 0.28±0.00  | 0.30±0.02  | 0.32±0.05  | -0.02±0.02 to 0.59±0.01   |
| 3-nitrotoluene                | -3.45 | -9.25±0.01 | -9.24±0.11 | -8.61±0.08 | -11.44±0.07 to -8.06±0.05 |
| cyanobenzene                  | -4.10 | -5.18±0.00 | -5.23±0.02 | -5.16±0.01 | -5.49±0.02 to -4.89±0.01  |

**TABLE 4:** Comparison of hydration free energies computed with different implicit solvent models versus experiment.

| Molecule name              | Expt.<br>(kcal/mol) | IGB=1 <sup>23</sup><br>(kcal/mol) | IGB=5 <sup>24</sup><br>(kcal/mol) | IGB=7 <sup>25</sup><br>(kcal/mol) | PB (ZAP)<br>(kcal/mol) |
|----------------------------|---------------------|-----------------------------------|-----------------------------------|-----------------------------------|------------------------|
| 2-methylpentan-2-ol        | -3.92               | -4.06±0.01                        | -2.67±0.00                        | -2.21±0.01                        | -3.74±0.01             |
| nitroethane                | -3.71               | -8.79±0.01                        | -9.78±0.01                        | -9.29±0.01                        | -9.23±0.01             |
| tetrahydrofuran            | -3.47               | -1.03±0.00                        | -1.32±0.00                        | -2.06±0.00                        | -2.05±0.00             |
| N-methylmorpholine         | -6.32               | -2.64±0.01                        | -2.21±0.01                        | -5.25±0.01                        | -5.37±0.01             |
| 3,3-dimethylbutan-2-one    | -3.11               | -3.60±0.00                        | -4.16±0.00                        | -4.01±0.00                        | -4.40±0.00             |
| acetaldehyde               | -3.50               | -5.45±0.00                        | -6.08±0.00                        | -5.74±0.00                        | -5.72±0.00             |
| N-acetylpyrrolidine        | -9.80               | -6.75±0.00                        | -7.27±0.00                        | -7.88±0.00                        | -7.91±0.00             |
| ethyl pentanoate           | -2.49               | -3.86±0.00                        | -4.46±0.00                        | -4.49±0.00                        | -5.08±0.00             |
| di-n-butyl ether           | -0.83               | 0.53±0.00                         | 0.47±0.00                         | 0.03±0.00                         | -0.65±0.02             |
| acetic acid                | -6.69               | -10.84±0.18                       | -7.69±0.15                        | -7.28±0.18                        | -8.08±0.15             |
| dimethylamine              | -4.29               | -2.42±0.00                        | -3.21±0.00                        | -3.49±0.00                        | -3.75±0.01             |
| 1,4-dioxane                | -5.06               | -3.03±0.00                        | -3.55±0.00                        | -4.54±0.00                        | -4.90±0.00             |
| di-n-propylamine           | -3.65               | -0.35±0.02                        | -0.40±0.02                        | -0.93±0.02                        | -2.35±0.02             |
| 1,1-difluoroethane         | -0.11               | -1.63±0.00                        | -2.03±0.00                        | -2.57±0.00                        | -1.90±0.00             |
| 2-methoxyphenol            | -5.57               | -8.41±0.01                        | -6.09±0.01                        | -6.62±0.01                        | -6.26±0.01             |
| methyl-octanoate           | -2.04               | -3.79±0.00                        | -4.46±0.00                        | -4.32±0.00                        | -4.93±0.00             |
| 1-bromo-2-chloroethane     | -1.95               | -1.63±0.01                        | -2.06±0.01                        | -2.14±0.01                        | -1.33±0.01             |
| hex-1-ene                  | 1.58                | 1.47±0.00                         | 1.35±0.00                         | 1.55±0.00                         | 1.38±0.00              |
| m-xylene                   | -0.83               | -0.86±0.00                        | -1.16±0.00                        | -1.93±0.00                        | -1.11±0.00             |
| ammonia                    | -4.29               | -7.07±0.00                        | -7.24±0.00                        | -5.38±0.00                        | -6.69±0.01             |
| 1,2,4,5-tetrachlorobenzene | -1.34               | 0.82±0.00                         | 0.47±0.00                         | 0.02±0.00                         | 0.71±0.00              |
| decane-1-ol                | -3.64               | -4.41±0.00                        | -2.66±0.00                        | -1.98±0.00                        | -3.54±0.00             |
| 1,1,1-trifluoropropan-2-ol | -4.16               | -8.59±0.00                        | -5.53±0.00                        | -6.79±0.00                        | -6.00±0.00             |
| pent-1-ene                 | 1.68                | 1.30±0.00                         | 1.18±0.00                         | 1.38±0.00                         | 1.26±0.00              |
| ethyl benzoate             | -3.64               | -5.89±0.01                        | -6.74±0.01                        | -7.71±0.01                        | -6.93±0.01             |
| 1-chlorohexane             | 0.00                | 0.65±0.00                         | 0.47±0.00                         | 0.57±0.00                         | 0.45±0.00              |
| 2,3,4-trimethylpentane     | 2.56                | 2.39±0.00                         | 2.46±0.00                         | 2.52±0.00                         | 2.34±0.00              |
| 4-cyanophenol              | -10.17              | -12.73±0.01                       | -9.89±0.00                        | -10.23±0.01                       | -9.62±0.00             |
| nonan-2-one                | -2.49               | -3.33±0.01                        | -3.92±0.01                        | -3.81±0.01                        | -4.18±0.01             |
| fluorene                   | -3.35               | -3.71±0.00                        | -4.22±0.00                        | -6.10±0.00                        | -4.21±0.00             |
| 4-bromotoluene             | -1.39               | -1.12±0.00                        | -1.54±0.00                        | -2.16±0.00                        | -1.08±0.00             |
| ethanethiol                | -1.14               | -1.71±0.00                        | -1.44±0.00                        | -1.32±0.00                        | -1.90±0.00             |
| 2-methylbutan-2-ol         | -4.43               | -4.36±0.01                        | -2.96±0.01                        | -2.49±0.01                        | -3.92±0.01             |
| 1-chloropropane            | -0.33               | 0.18±0.00                         | -0.01±0.00                        | 0.05±0.00                         | 0.04±0.00              |
| 1,4-dichlorobutane         | -2.32               | -1.26±0.00                        | -1.64±0.00                        | -1.60±0.00                        | -1.57±0.00             |
| 1,2,3-trimethylbenzene     | -1.21               | -0.70±0.00                        | -0.90±0.00                        | -1.77±0.00                        | -1.00±0.00             |
| n-pentyl acetate           | -2.51               | -4.13±0.00                        | -4.78±0.00                        | -4.87±0.00                        | -5.30±0.00             |
| dimethyl sulfone           | -10.08              | -10.77±0.01                       | -12.30±0.01                       | -13.53±0.01                       | -12.37±0.01            |
| 1,1,2,2-tetrachloroethane  | -2.47               | -1.37±0.01                        | -1.81±0.01                        | -2.79±0.01                        | -0.96±0.01             |
| methyl p-nitrobenzoate     | -6.88               | -13.09±0.01                       | -14.76±0.01                       | -15.24±0.01                       | -13.68±0.01            |
| 1,2-dichloropropane        | -1.27               | -1.06±0.01                        | -1.41±0.01                        | -1.53±0.01                        | -1.29±0.01             |
| 1,2,3,4-tetrachlorobenzene | -1.34               | 0.61±0.00                         | 0.29±0.00                         | -0.02±0.00                        | 0.49±0.00              |
| ethyl butanoate            | -2.49               | -4.06±0.01                        | -4.66±0.01                        | -4.71±0.01                        | -5.32±0.03             |
| isobutylbenzene            | 0.16                | -0.54±0.00                        | -0.83±0.00                        | -1.51±0.00                        | -0.87±0.00             |
| isobutyl isobutanoate      | -1.69               | -3.41±0.00                        | -3.87±0.00                        | -3.85±0.00                        | -4.65±0.00             |
| 3-chloroaniline            | -5.82               | -5.44±0.00                        | -6.11±0.00                        | -7.00±0.00                        | -6.10±0.01             |
| 3-methylbutanoic acid      | -6.09               | -9.36±0.18                        | -6.25±0.15                        | -5.62±0.18                        | -7.13±0.15             |
| 4-nitroaniline             | -10.27              | -13.72±0.00                       | -15.01±0.00                       | -16.04±0.00                       | -15.20±0.00            |
| 3-methylhexane             | 2.71                | 2.32±0.00                         | 2.34±0.00                         | 2.43±0.00                         | 2.28±0.00              |
| nitrobenzene               | -4.12               | -8.80±0.01                        | -9.90±0.01                        | -10.34±0.01                       | -9.02±0.01             |
| butanoic acid              | -6.35               | -9.49±0.01                        | -6.47±0.00                        | -5.96±0.01                        | -7.21±0.01             |
| 2-ethoxyethanol            | -6.69               | -5.88±0.01                        | -4.43±0.01                        | -4.25±0.01                        | -5.82±0.01             |
| benzamide                  | -11.00              | -10.14±0.00                       | -11.00±0.00                       | -12.64±0.00                       | -11.59±0.00            |
| bromobenzene               | -1.46               | -1.47±0.00                        | -1.96±0.00                        | -2.56±0.00                        | -1.33±0.00             |
| 2,6-dimethylaniline        | -5.21               | -4.88±0.00                        | -5.42±0.00                        | -6.30±0.00                        | -5.78±0.01             |
| tetrahydropyran            | -3.12               | -0.46±0.02                        | -0.68±0.02                        | -1.34±0.02                        | -1.43±0.02             |
| n-butyl acetate            | -2.64               | -4.31±0.00                        | -4.96±0.00                        | -5.05±0.00                        | -5.44±0.00             |

|                                 |       |             |             |             |             |
|---------------------------------|-------|-------------|-------------|-------------|-------------|
| diisopropyl ether               | -0.53 | 0.07±0.00   | 0.14±0.00   | -0.62±0.00  | -1.01±0.00  |
| n-propyl formate                | -2.48 | -5.55±0.00  | -6.38±0.00  | -5.73±0.00  | -6.31±0.00  |
| ethyl propanoate                | -2.68 | -4.33±0.00  | -4.96±0.00  | -5.04±0.00  | -5.46±0.00  |
| p-dibromobenzene                | -2.30 | -0.98±0.00  | -1.50±0.00  | -2.08±0.00  | -0.80±0.00  |
| n-propyl butyrate               | -2.28 | -3.77±0.00  | -4.32±0.00  | -4.35±0.00  | -5.04±0.03  |
| 1,1,1-trichloroethane           | -0.19 | 0.16±0.00   | -0.06±0.00  | -0.43±0.00  | 0.32±0.00   |
| 2-iodophenol                    | -6.20 | -8.45±0.01  | -5.38±0.01  | -5.77±0.01  | -4.39±0.01  |
| 2,3-dimethylbuta-1,3-diene      | 0.40  | 0.56±0.00   | 0.37±0.00   | 0.35±0.00   | 0.45±0.00   |
| pyrrolidine                     | -5.48 | -1.70±0.01  | -1.99±0.01  | -3.20±0.01  | -3.54±0.01  |
| 2-methyl-but-2-ene              | 1.31  | 1.29±0.00   | 1.17±0.00   | 1.14±0.00   | 1.19±0.00   |
| 2,3-dimethylpentane             | 2.52  | 2.28±0.00   | 2.32±0.00   | 2.38±0.00   | 2.25±0.00   |
| p-cresol                        | -6.13 | -8.82±0.00  | -6.14±0.00  | -6.58±0.00  | -6.30±0.00  |
| 2-chloro-1,1,1-trimethoxyethane | -4.59 | -3.76±0.01  | -4.08±0.01  | -4.70±0.01  | -5.59±0.01  |
| 1-bromo-2-methylpropane         | -0.03 | 0.06±0.01   | -0.12±0.01  | 0.03±0.01   | 0.44±0.01   |
| 4-cyanopyridine                 | -6.02 | -7.46±0.00  | -8.31±0.00  | -9.80±0.00  | -7.52±0.00  |
| toluene                         | -0.89 | -1.22±0.00  | -1.60±0.00  | -2.30±0.00  | -1.33±0.00  |
| 2,2-dimethylpentane             | 2.88  | 2.29±0.00   | 2.33±0.00   | 2.36±0.00   | 2.26±0.00   |
| 1,2,4-trimethylbenzene          | -0.86 | -0.58±0.00  | -0.79±0.00  | -1.67±0.00  | -0.94±0.00  |
| 1-chloro-2,2,2-trifluoroethane  | 0.06  | -2.63±0.00  | -3.13±0.00  | -5.16±0.00  | -1.90±0.00  |
| 3-nitrophenol                   | -9.62 | -16.53±0.01 | -13.95±0.01 | -14.07±0.01 | -13.26±0.01 |
| dimethoxymethane                | -2.93 | -3.03±0.02  | -3.75±0.02  | -4.03±0.02  | -4.89±0.02  |
| non-1-ene                       | 2.06  | 1.92±0.00   | 1.81±0.00   | 2.05±0.00   | 1.75±0.00   |
| propionaldehyde                 | -3.43 | -4.87±0.00  | -5.48±0.00  | -5.08±0.00  | -5.30±0.00  |
| cyclohexanol                    | -5.46 | -4.83±0.00  | -3.16±0.00  | -2.63±0.00  | -4.07±0.00  |
| 2,3-dimethylpyridine            | -4.82 | -3.86±0.00  | -4.39±0.00  | -5.99±0.00  | -4.18±0.00  |
| 3-methyl-1h-indole              | -5.88 | -5.55±0.00  | -5.93±0.00  | -8.36±0.00  | -6.20±0.00  |
| 2-methylpropene                 | 1.16  | 1.09±0.00   | 0.97±0.00   | 1.04±0.00   | 1.08±0.00   |
| diethyl malonate                | -6.00 | -8.36±0.01  | -9.41±0.01  | -9.64±0.01  | -10.64±0.10 |
| 1-naphthylamine                 | -7.28 | -7.27±0.00  | -8.04±0.00  | -9.58±0.00  | -8.30±0.01  |
| Z-1,2-dichloroethene            | -1.17 | -0.86±0.00  | -1.24±0.00  | -1.64±0.00  | -0.93±0.00  |
| but-1-ene                       | 1.38  | 1.12±0.00   | 0.99±0.00   | 1.17±0.00   | 1.11±0.00   |
| trans-1,4-dimethylcyclohexane   | 2.11  | 2.31±0.00   | 2.39±0.00   | 2.34±0.00   | 2.23±0.00   |
| 4-n-propylphenol                | -5.90 | -8.32±0.00  | -5.59±0.00  | -6.04±0.00  | -5.98±0.00  |
| 2-methoxyethanamine             | -6.55 | -4.94±0.01  | -5.87±0.01  | -5.27±0.01  | -6.96±0.01  |
| dimethyl sulfoxide              | -8.71 | -7.81±0.00  | -8.49±0.00  | -9.58±0.00  | -9.74±0.00  |
| n-butylbenzene                  | -0.40 | -0.56±0.00  | -0.88±0.00  | -1.56±0.00  | -0.88±0.00  |
| 3-phenylpropanol                | -6.92 | -7.55±0.02  | -6.09±0.02  | -6.23±0.02  | -6.80±0.02  |
| propan-2-ol                     | -4.74 | -5.30±0.01  | -3.65±0.00  | -3.17±0.01  | -4.44±0.01  |
| 1-nitropropane                  | -3.34 | -8.23±0.01  | -9.17±0.01  | -8.61±0.01  | -8.77±0.01  |
| m-bistrifluoromethyl benzene    | 1.07  | -4.72±0.00  | -5.33±0.00  | -9.36±0.00  | -4.02±0.00  |
| 3-methylbut-1-ene               | 1.82  | 1.29±0.00   | 1.17±0.00   | 1.33±0.00   | 1.24±0.00   |
| 1-bromoheptane                  | 0.34  | 0.56±0.00   | 0.37±0.00   | 0.54±0.00   | 0.88±0.00   |
| butanone                        | -3.71 | -4.62±0.00  | -5.24±0.00  | -4.79±0.00  | -5.12±0.00  |
| 1,1,1-trimethoxyethane          | -4.42 | -3.38±0.00  | -3.59±0.00  | -4.27±0.00  | -5.34±0.00  |
| 3-ethylpyridine                 | -4.59 | -3.88±0.00  | -4.45±0.00  | -6.02±0.00  | -4.23±0.00  |
| anisole                         | -2.45 | -3.10±0.00  | -3.71±0.00  | -4.48±0.00  | -3.49±0.00  |
| propane                         | 1.96  | 1.79±0.00   | 1.78±0.00   | 1.84±0.00   | 1.82±0.00   |
| 3-chlorophenol                  | -6.62 | -8.95±0.00  | -6.05±0.00  | -6.40±0.00  | -6.09±0.00  |
| dichloromethane                 | -1.31 | -0.97±0.00  | -1.29±0.00  | -1.57±0.00  | -0.80±0.00  |
| 2,5-dimethylphenol              | -5.91 | -7.72±0.02  | -5.12±0.02  | -5.68±0.02  | -5.52±0.02  |
| biphenyl                        | -2.66 | -3.54±0.00  | -4.22±0.00  | -5.73±0.00  | -4.08±0.00  |
| nonan-1-ol                      | -3.88 | -4.52±0.00  | -2.79±0.00  | -2.11±0.00  | -3.68±0.00  |
| methylcyclohexane               | 1.70  | 2.16±0.00   | 2.19±0.00   | 2.17±0.00   | 2.12±0.00   |
| 3,4-dimethylphenol              | -6.50 | -8.48±0.01  | -5.72±0.01  | -6.23±0.01  | -6.07±0.01  |
| tert-butylbenzene               | -0.44 | -0.61±0.00  | -0.86±0.00  | -1.61±0.00  | -0.99±0.00  |
| diethoxymethoxybenzene          | -5.23 | -4.63±0.00  | -4.75±0.00  | -6.26±0.00  | -7.43±0.00  |
| pent-1-yne                      | 0.01  | 0.38±0.00   | 0.15±0.00   | 0.16±0.00   | 0.42±0.00   |
| n-butylamine                    | -4.24 | -3.00±0.00  | -3.73±0.00  | -2.73±0.00  | -4.28±0.01  |
| 1-chloropentane                 | -0.07 | 0.50±0.00   | 0.32±0.00   | 0.41±0.00   | 0.32±0.00   |
| iodoethane                      | -0.74 | -2.70±0.00  | -3.04±0.00  | -2.86±0.00  | -1.56±0.00  |
| 1,2-dibromoethane               | -2.33 | -1.77±0.00  | -2.22±0.00  | -2.21±0.00  | -1.04±0.00  |

|                         |       |             |             |             |             |
|-------------------------|-------|-------------|-------------|-------------|-------------|
| 2-nitrophenol           | -4.58 | -13.46±0.03 | -10.32±0.03 | -10.34±0.03 | -9.86±0.03  |
| undecan-2-one           | -2.15 | -3.02±0.00  | -3.59±0.00  | -3.47±0.00  | -3.91±0.00  |
| ethylbenzene            | -0.79 | -0.94±0.00  | -1.29±0.00  | -1.99±0.00  | -1.16±0.00  |
| 2,5-dimethylpyridine    | -4.72 | -3.77±0.00  | -4.28±0.00  | -5.89±0.00  | -4.12±0.00  |
| n-octylamine            | -3.65 | -2.13±0.00  | -2.83±0.00  | -1.81±0.00  | -3.60±0.01  |
| o-xylene                | -0.90 | -0.96±0.00  | -1.25±0.00  | -2.05±0.00  | -1.17±0.00  |
| 4-tert-butylphenol      | -5.91 | -8.16±0.01  | -5.36±0.01  | -5.89±0.01  | -5.96±0.01  |
| benzyl chloride         | -1.93 | -2.37±0.00  | -2.93±0.00  | -3.73±0.00  | -2.70±0.00  |
| n-butanethiol           | -0.99 | -1.23±0.00  | -0.99±0.00  | -0.79±0.00  | -1.54±0.00  |
| piperidine              | -5.11 | -1.31±0.04  | -1.48±0.04  | -2.64±0.04  | -2.96±0.06  |
| n-octane                | 2.88  | 2.51±0.00   | 2.51±0.00   | 2.64±0.00   | 2.44±0.00   |
| 2,2,5-trimethylhexane   | 2.93  | 2.56±0.00   | 2.64±0.00   | 2.67±0.00   | 2.48±0.00   |
| acetophenone            | -4.58 | -6.16±0.00  | -7.07±0.00  | -7.98±0.00  | -6.78±0.00  |
| 2-bromo-2-methylpropane | 0.84  | -0.39±0.00  | -0.58±0.00  | -0.39±0.00  | 0.10±0.00   |
| trimethylamine          | -3.20 | -1.11±0.01  | -1.22±0.01  | -3.19±0.01  | -2.91±0.01  |
| pentan-3-one            | -3.41 | -3.75±0.00  | -4.31±0.00  | -4.22±0.00  | -4.50±0.00  |
| n-propylbenzene         | -0.53 | -0.73±0.00  | -1.06±0.00  | -1.75±0.00  | -1.01±0.00  |
| cyclohexylamine         | -4.59 | -2.29±0.01  | -2.93±0.01  | -2.06±0.01  | -3.97±0.01  |
| butan-1-ol              | -4.72 | -5.34±0.00  | -3.63±0.00  | -2.98±0.00  | -4.32±0.00  |
| 1,1-diethoxyethane      | -3.28 | -1.25±0.01  | -1.25±0.01  | -2.23±0.01  | -3.16±0.01  |
| hexanal                 | -2.81 | -4.26±0.00  | -4.88±0.00  | -4.40±0.00  | -4.84±0.00  |
| E-hept-2-ene            | 1.68  | 1.73±0.00   | 1.62±0.00   | 1.73±0.00   | 1.52±0.00   |
| chlorobenzene           | -1.12 | -1.14±0.00  | -1.60±0.00  | -2.23±0.00  | -1.25±0.00  |
| isobutyl acetate        | -2.36 | -4.26±0.00  | -4.87±0.00  | -4.98±0.00  | -5.39±0.00  |
| 2-chlorotoluene         | -1.14 | -0.90±0.00  | -1.30±0.00  | -1.89±0.00  | -1.06±0.00  |
| 1,2-dimethoxyethane     | -4.84 | -3.06±0.01  | -3.74±0.01  | -4.26±0.01  | -5.01±0.01  |
| iodomethane             | -0.89 | -2.88±0.00  | -3.22±0.00  | -3.07±0.00  | -1.72±0.00  |
| anthracene              | -3.95 | -4.26±0.00  | -4.91±0.00  | -6.81±0.00  | -5.00±0.00  |
| hexafluoropropene       | -3.76 | -1.85±0.00  | -1.92±0.00  | -6.01±0.00  | -0.21±0.00  |
| n-butane                | 2.07  | 1.92±0.00   | 1.91±0.00   | 1.99±0.00   | 1.94±0.00   |
| 2,4-dimethylpentane     | 2.83  | 2.31±0.00   | 2.33±0.00   | 2.41±0.00   | 2.27±0.00   |
| 2-nitropropane          | -3.13 | -7.88±0.01  | -8.74±0.01  | -8.25±0.01  | -8.59±0.01  |
| n-heptylamine           | -3.79 | -2.31±0.01  | -3.02±0.01  | -2.01±0.01  | -3.74±0.01  |
| trimethyl phosphate     | -8.70 | -11.88±0.01 | -13.47±0.01 | -11.42±0.01 | -14.70±0.02 |
| 1-bromohexane           | 0.18  | 0.41±0.00   | 0.23±0.00   | 0.39±0.00   | 0.75±0.00   |
| hept-1-ene              | 1.66  | 1.62±0.00   | 1.50±0.00   | 1.72±0.00   | 1.50±0.00   |
| dibromomethane          | -1.96 | -0.42±0.00  | -0.72±0.00  | -0.79±0.00  | 0.04±0.00   |
| pentan-3-ol             | -4.35 | -4.33±0.00  | -2.83±0.00  | -2.27±0.00  | -3.86±0.00  |
| n-propylamine           | -4.39 | -3.04±0.00  | -3.77±0.00  | -2.79±0.00  | -4.25±0.01  |
| n-decane                | 3.16  | 2.80±0.00   | 2.82±0.00   | 2.96±0.00   | 2.69±0.00   |
| methyl formate          | -2.78 | -8.54±0.05  | -9.58±0.05  | -8.71±0.05  | -9.41±0.05  |
| teflurane               | 0.50  | -3.24±0.00  | -3.65±0.00  | -7.13±0.00  | -1.48±0.00  |
| 1,2-diethoxyethane      | -3.54 | -2.13±0.01  | -2.48±0.01  | -3.39±0.01  | -5.18±0.21  |
| 4-chloro-3-methylphenol | -6.79 | -8.69±0.01  | -5.84±0.00  | -6.19±0.01  | -5.99±0.01  |
| 2-iodopropane           | -0.46 | -2.46±0.00  | -2.77±0.00  | -2.55±0.00  | -1.35±0.00  |
| methyl trifluoroacetate | -1.10 | -5.45±0.00  | -5.93±0.00  | -8.10±0.00  | -4.36±0.00  |
| o-toluidine             | -5.53 | -5.49±0.00  | -6.12±0.00  | -6.92±0.00  | -6.15±0.01  |
| E-hex-2-enal            | -3.68 | -5.09±0.00  | -5.70±0.00  | -5.59±0.00  | -5.31±0.00  |
| 2-methylthiophene       | -1.38 | -0.66±0.00  | -0.96±0.00  | -1.97±0.00  | -0.86±0.00  |
| buta-1,3-diene          | 0.61  | 0.16±0.02   | -0.08±0.02  | 0.06±0.02   | 0.13±0.02   |
| methyl pentanoate       | -2.56 | -4.25±0.00  | -4.94±0.00  | -4.82±0.00  | -5.39±0.02  |
| 2-ethyltoluene          | -1.04 | -0.70±0.00  | -0.95±0.00  | -1.75±0.00  | -1.00±0.00  |
| chlorofluoromethane     | -0.77 | -2.25±0.00  | -2.63±0.00  | -3.09±0.00  | -1.98±0.00  |
| 1,4-dimethylnaphthalene | -2.82 | -2.40±0.00  | -2.75±0.00  | -4.12±0.00  | -2.95±0.00  |
| 1-iodohexane            | 0.08  | -1.82±0.00  | -2.14±0.00  | -1.87±0.00  | -0.77±0.00  |
| octan-1-ol              | -4.09 | -4.68±0.00  | -2.96±0.00  | -2.28±0.00  | -3.81±0.00  |
| phenyl formate          | -3.82 | -7.93±0.02  | -8.99±0.02  | -8.95±0.02  | -8.43±0.02  |
| benzyl alcohol          | -6.62 | -7.76±0.01  | -6.18±0.01  | -6.61±0.01  | -6.76±0.01  |
| 1,3-dichlorobenzene     | -0.98 | -0.48±0.00  | -0.94±0.00  | -1.56±0.00  | -0.65±0.00  |
| octan-2-one             | -2.88 | -3.49±0.00  | -4.08±0.00  | -3.99±0.00  | -4.36±0.02  |
| cyclopentanone          | -4.70 | -4.08±0.00  | -4.60±0.00  | -4.60±0.00  | -4.53±0.00  |

|                                         |       |             |             |             |             |
|-----------------------------------------|-------|-------------|-------------|-------------|-------------|
| sec-butylbenzene                        | -0.45 | -0.50±0.00  | -0.76±0.00  | -1.46±0.00  | -0.87±0.00  |
| 1-bromopentane                          | -0.10 | 0.26±0.00   | 0.08±0.00   | 0.22±0.00   | 0.63±0.00   |
| iodobenzene                             | -1.74 | -1.83±0.00  | -2.34±0.00  | -2.82±0.00  | -1.48±0.00  |
| N-methyl-N-2,2,2-trifluoroethyl-aniline | -1.92 | -5.89±0.01  | -6.01±0.01  | -10.61±0.01 | -6.46±0.01  |
| n-hexylbenzene                          | -0.04 | -0.25±0.00  | -0.54±0.00  | -1.22±0.00  | -0.64±0.00  |
| 2-chloroaniline                         | -4.91 | -5.41±0.01  | -6.07±0.01  | -7.22±0.01  | -5.90±0.01  |
| propan-1-ol                             | -4.85 | -5.55±0.01  | -3.84±0.00  | -3.20±0.01  | -4.46±0.01  |
| isoflurane                              | 0.10  | -6.01±0.01  | -6.59±0.01  | -10.78±0.01 | -4.86±0.01  |
| p-toluidine                             | -5.57 | -5.68±0.00  | -6.30±0.00  | -7.18±0.00  | -6.26±0.00  |
| isopropyl acetate                       | -2.64 | -4.41±0.00  | -5.03±0.00  | -5.23±0.00  | -5.60±0.01  |
| 3-cyanophenol                           | -9.65 | -12.17±0.01 | -9.34±0.00  | -9.67±0.01  | -9.07±0.01  |
| 2-bromopropane                          | -0.48 | -0.33±0.00  | -0.52±0.00  | -0.41±0.00  | 0.11±0.00   |
| butyraldehyde                           | -3.18 | -4.62±0.00  | -5.23±0.00  | -4.78±0.00  | -5.11±0.00  |
| methyl acetate                          | -3.13 | -5.23±0.00  | -6.03±0.00  | -6.00±0.00  | -6.11±0.00  |
| 1-methyl-pyrrole                        | -2.89 | -2.79±0.00  | -3.30±0.00  | -3.98±0.00  | -2.73±0.00  |
| pyrene                                  | -4.52 | -5.07±0.00  | -5.70±0.00  | -7.76±0.00  | -5.86±0.00  |
| 2-methylpyridine                        | -4.63 | -4.32±0.00  | -4.95±0.00  | -6.58±0.00  | -4.56±0.00  |
| heptanal                                | -2.67 | -4.11±0.00  | -4.72±0.00  | -4.24±0.00  | -4.78±0.03  |
| pentachloroethane                       | -1.39 | -0.33±0.01  | -0.57±0.01  | -1.83±0.01  | 0.49±0.01   |
| n-hexyl acetate                         | -2.26 | -3.98±0.00  | -4.62±0.00  | -4.70±0.00  | -5.18±0.00  |
| ethyl formate                           | -2.56 | -5.88±0.00  | -6.74±0.00  | -6.11±0.00  | -6.57±0.00  |
| 4-ethylphenol                           | -6.13 | -8.53±0.01  | -5.82±0.01  | -6.28±0.01  | -6.12±0.01  |
| 2,4-dimethylpyridine                    | -4.86 | -4.00±0.00  | -4.54±0.00  | -6.21±0.00  | -4.34±0.00  |
| methyl methanesulfonate                 | -4.87 | -10.47±0.01 | -12.20±0.01 | -11.47±0.01 | -11.39±0.01 |
| 1,1,1,2-tetrachloroethane               | -1.28 | -0.65±0.00  | -0.97±0.00  | -1.72±0.00  | -0.21±0.00  |
| tribromomethane                         | -2.13 | 0.63±0.00   | 0.41±0.00   | 0.24±0.00   | 1.02±0.00   |
| hex-1-yne                               | 0.29  | 0.55±0.00   | 0.32±0.00   | 0.34±0.00   | 0.57±0.00   |
| 3-hydroxybenzaldehyde                   | -9.50 | -14.51±0.01 | -12.15±0.01 | -12.41±0.01 | -11.84±0.01 |
| 3-chloroprop-1-ene                      | -0.57 | -0.45±0.00  | -0.76±0.00  | -0.78±0.00  | -0.58±0.00  |
| n-heptane                               | 2.67  | 2.36±0.00   | 2.36±0.00   | 2.47±0.00   | 2.32±0.00   |
| ethylamine                              | -4.50 | -3.41±0.01  | -4.15±0.01  | -3.24±0.01  | -4.45±0.01  |
| 4-isopropyltoluene                      | -0.68 | -0.36±0.00  | -0.56±0.00  | -1.38±0.00  | -0.81±0.00  |
| 2-chloro-2-methylpropane                | 1.09  | 0.08±0.00   | -0.11±0.00  | 0.02±0.00   | -0.13±0.00  |
| diethyl sulfide                         | -1.46 | -0.36±0.00  | -0.67±0.00  | -0.60±0.00  | -1.13±0.00  |
| n-propyl propanoate                     | -2.44 | -4.04±0.00  | -4.62±0.00  | -4.70±0.00  | -5.21±0.00  |
| 2,3-dimethylphenol                      | -6.16 | -8.24±0.00  | -5.67±0.00  | -6.12±0.00  | -5.92±0.00  |
| 4-chlorophenol                          | -7.03 | -8.99±0.01  | -6.19±0.01  | -6.57±0.01  | -6.19±0.01  |
| 1-bromobutane                           | -0.40 | 0.12±0.00   | -0.07±0.00  | 0.06±0.00   | 0.50±0.00   |
| dimethyl sulfate                        | -5.10 | -11.83±0.01 | -13.87±0.01 | -9.75±0.01  | -10.99±0.01 |
| n-pentyl propanoate                     | -2.11 | -3.66±0.00  | -4.21±0.00  | -4.27±0.00  | -4.99±0.03  |
| 3-ethylphenol                           | -6.25 | -8.53±0.00  | -5.81±0.00  | -6.20±0.00  | -6.09±0.00  |
| 3-nitroaniline                          | -8.84 | -12.61±0.00 | -13.83±0.00 | -14.71±0.00 | -13.60±0.01 |
| propanone                               | -3.80 | -4.65±0.00  | -5.30±0.00  | -5.38±0.00  | -5.23±0.00  |
| tetrafluoromethane                      | 3.12  | -2.05±0.00  | -2.27±0.00  | -5.17±0.00  | 0.74±0.00   |
| di-n-propyl sulfide                     | -1.28 | 0.15±0.00   | -0.14±0.00  | -0.01±0.00  | -0.71±0.00  |
| 1-methyl-imidazole                      | -8.41 | -6.66±0.00  | -7.42±0.00  | -9.09±0.00  | -7.30±0.00  |
| ethane                                  | 1.83  | 1.66±0.00   | 1.66±0.00   | 1.71±0.00   | 1.70±0.00   |
| 2-chloropyridine                        | -4.39 | -4.87±0.00  | -5.52±0.00  | -7.57±0.00  | -4.79±0.00  |
| 4-hydroxybenzaldehyde                   | -8.83 | -14.85±0.01 | -12.37±0.01 | -12.69±0.01 | -12.09±0.01 |
| halothane                               | -0.11 | -2.06±0.00  | -2.46±0.00  | -4.95±0.00  | -0.52±0.00  |
| 2-ethylpyrazine                         | -5.45 | -7.44±0.00  | -8.28±0.00  | -10.65±0.00 | -8.17±0.00  |
| benzonitrile                            | -4.21 | -4.57±0.00  | -5.18±0.00  | -5.78±0.00  | -4.58±0.00  |
| diiodomethane                           | -2.49 | -4.02±0.00  | -4.54±0.00  | -4.55±0.00  | -2.28±0.00  |
| 2-chlorophenol                          | -4.55 | -7.79±0.01  | -4.86±0.01  | -5.60±0.01  | -4.61±0.01  |
| 2-methoxyaniline                        | -6.12 | -6.96±0.00  | -7.71±0.00  | -8.65±0.00  | -7.85±0.01  |
| chloroethane                            | -0.63 | -0.04±0.00  | -0.23±0.00  | -0.21±0.00  | -0.16±0.00  |
| 3,5-dimethylpyridine                    | -4.84 | -3.67±0.00  | -4.16±0.00  | -5.70±0.00  | -4.04±0.00  |
| methyl trimethylacetate                 | -2.40 | -4.04±0.00  | -4.65±0.00  | -4.42±0.00  | -5.10±0.00  |
| 4-methylbenzaldehyde                    | -4.27 | -6.56±0.00  | -7.39±0.00  | -8.01±0.00  | -6.91±0.00  |
| benzaldehyde                            | -4.02 | -6.89±0.00  | -7.79±0.00  | -8.40±0.00  | -7.12±0.00  |
| 1,4-dichlorobenzene                     | -1.01 | -0.58±0.00  | -1.06±0.00  | -1.68±0.00  | -0.77±0.00  |

|                                        |        |             |             |             |             |
|----------------------------------------|--------|-------------|-------------|-------------|-------------|
| n-pentylamine                          | -4.09  | -2.63±0.01  | -3.34±0.01  | -2.35±0.01  | -3.98±0.01  |
| 2-methylpentane                        | 2.51   | 2.19±0.00   | 2.20±0.00   | 2.28±0.00   | 2.17±0.00   |
| pentan-1-ol                            | -4.57  | -5.15±0.00  | -3.44±0.00  | -2.79±0.00  | -4.19±0.00  |
| cyclopentanol                          | -5.49  | -5.00±0.00  | -3.32±0.00  | -2.86±0.00  | -4.19±0.00  |
| 1,2-dichloroethane                     | -1.79  | -1.36±0.01  | -1.75±0.01  | -1.92±0.01  | -1.48±0.01  |
| 1,3-dichloropropane                    | -1.89  | -1.50±0.00  | -1.93±0.00  | -1.96±0.00  | -1.73±0.00  |
| 1-chloroheptane                        | 0.29   | 0.83±0.00   | 0.66±0.00   | 0.77±0.00   | 0.61±0.00   |
| 1,3,5-trichlorobenzene                 | -0.78  | 0.43±0.00   | -0.00±0.00  | -0.61±0.00  | 0.27±0.00   |
| 3-methoxyaniline                       | -7.29  | -7.56±0.00  | -8.37±0.00  | -9.35±0.00  | -8.51±0.01  |
| hexanoic acid                          | -6.21  | -9.38±0.21  | -6.27±0.19  | -5.74±0.21  | -7.10±0.19  |
| chlorodifluoromethane                  | -0.50  | -3.12±0.00  | -3.53±0.00  | -5.18±0.00  | -2.10±0.00  |
| 1,3-dimethylnaphthalene                | -2.47  | -2.33±0.00  | -2.69±0.00  | -4.09±0.00  | -2.91±0.00  |
| N,N-dimethyl p-nitrobenzamide          | -11.95 | -14.76±0.04 | -16.38±0.04 | -17.11±0.04 | -15.79±0.04 |
| 1-bromopropane                         | -0.56  | -0.07±0.00  | -0.26±0.00  | -0.14±0.00  | 0.33±0.00   |
| 2,4-dimethylpentan-3-one               | -2.74  | -3.09±0.00  | -3.65±0.00  | -3.34±0.00  | -3.93±0.00  |
| ethyl phenyl ether                     | -2.22  | -2.67±0.00  | -3.16±0.00  | -4.13±0.00  | -3.25±0.02  |
| isobutyraldehyde                       | -2.86  | -4.42±0.00  | -5.03±0.00  | -4.60±0.00  | -5.03±0.00  |
| styrene                                | -1.24  | -1.94±0.00  | -2.43±0.00  | -3.18±0.00  | -2.23±0.00  |
| dimethyl-disulfide                     | -1.83  | -0.99±0.00  | -1.29±0.00  | -1.65±0.00  | -1.55±0.00  |
| 1H-imidazole                           | -9.63  | -8.52±0.00  | -9.30±0.00  | -11.53±0.00 | -9.21±0.00  |
| 4-methylpentan-2-one                   | -3.05  | -3.75±0.00  | -4.34±0.00  | -4.20±0.00  | -4.55±0.00  |
| tetrachloromethane                     | 0.08   | 1.10±0.00   | 1.05±0.00   | 0.35±0.00   | 1.95±0.00   |
| diethylamine                           | -4.07  | -0.97±0.02  | -1.20±0.02  | -1.95±0.02  | -2.77±0.03  |
| propene                                | 1.32   | 0.92±0.00   | 0.79±0.00   | 0.96±0.00   | 0.96±0.00   |
| 1,1-dichloroethane                     | -0.84  | -0.54±0.00  | -0.83±0.00  | -1.05±0.00  | -0.59±0.00  |
| 1,1,1-trifluoro-2,2,2-trimethoxyethane | -0.80  | -4.22±0.01  | -4.44±0.01  | -5.85±0.01  | -5.32±0.01  |
| methyl-propyl-ether                    | -1.66  | -0.53±0.00  | -0.86±0.00  | -1.18±0.00  | -1.42±0.00  |
| 2,5-dimethyltetrahydrofuran            | -2.92  | -0.45±0.00  | -0.45±0.00  | -1.49±0.00  | -1.61±0.00  |
| triethylamine                          | -3.22  | 0.32±0.01   | 1.33±0.01   | -1.01±0.01  | -1.63±0.02  |
| benzotrifluoride                       | -0.25  | -2.73±0.00  | -3.33±0.00  | -5.48±0.00  | -2.63±0.00  |
| 2,6-dimethylnaphthalene                | -2.63  | -2.27±0.00  | -2.64±0.00  | -4.07±0.00  | -2.89±0.00  |
| fluorobenzene                          | -0.80  | -1.25±0.00  | -1.71±0.00  | -2.33±0.00  | -1.41±0.00  |
| 2-naphthol                             | -8.11  | -10.62±0.01 | -8.04±0.01  | -9.04±0.01  | -8.25±0.01  |
| methyl cyanoacetate                    | -6.72  | -9.19±0.01  | -10.21±0.01 | -10.44±0.01 | -9.55±0.01  |
| hexan-1-ol                             | -4.40  | -4.99±0.01  | -3.27±0.01  | -2.61±0.01  | -4.06±0.01  |
| n-butylacetamide                       | -9.31  | -7.78±0.01  | -8.40±0.01  | -8.79±0.01  | -9.62±0.07  |
| 2-nitroaniline                         | -7.37  | -11.77±0.04 | -12.75±0.04 | -14.22±0.04 | -13.97±0.04 |
| aniline                                | -5.49  | -6.12±0.00  | -6.83±0.00  | -7.59±0.00  | -6.51±0.01  |
| 4-ethyltoluene                         | -0.95  | -0.58±0.00  | -0.84±0.00  | -1.63±0.00  | -0.94±0.00  |
| n-pentylbenzene                        | -0.23  | -0.40±0.00  | -0.71±0.00  | -1.39±0.00  | -0.76±0.00  |
| naphthalene                            | -2.40  | -3.07±0.00  | -3.62±0.00  | -4.93±0.00  | -3.42±0.00  |
| nitromethane                           | -4.02  | -9.92±0.01  | -11.09±0.01 | -10.52±0.01 | -10.13±0.01 |
| benzyl bromide                         | -2.38  | -2.67±0.00  | -3.27±0.00  | -3.93±0.00  | -2.46±0.00  |
| 1,2-ethanediol                         | -9.30  | -12.30±0.01 | -8.57±0.00  | -7.27±0.01  | -9.71±0.00  |
| trichloromethane                       | -1.08  | -0.47±0.00  | -0.76±0.00  | -1.43±0.00  | 0.04±0.00   |
| 3,3-dimethylpentane                    | 2.56   | 2.25±0.00   | 2.30±0.00   | 2.33±0.00   | 2.24±0.00   |
| N,N-dimethyl-p-methylbenzamide         | -9.76  | -7.46±0.02  | -8.22±0.02  | -9.35±0.02  | -8.72±0.02  |
| Z-pent-2-ene                           | 1.31   | 1.28±0.00   | 1.14±0.00   | 1.22±0.00   | 1.22±0.00   |
| diethyl ether                          | -1.59  | -0.36±0.00  | -0.59±0.00  | -1.13±0.00  | -1.32±0.00  |
| 4-methoxyaniline                       | -7.48  | -7.47±0.00  | -8.32±0.00  | -9.27±0.00  | -8.28±0.00  |
| 3-methylpentane                        | 2.51   | 2.17±0.00   | 2.18±0.00   | 2.26±0.00   | 2.16±0.00   |
| 1-naphthol                             | -7.67  | -10.32±0.01 | -7.74±0.00  | -8.86±0.01  | -7.92±0.01  |
| methyl p-methoxybenzoate               | -5.33  | -7.72±0.00  | -8.84±0.00  | -9.74±0.00  | -8.97±0.00  |
| hexan-3-ol                             | -4.06  | -4.18±0.01  | -2.70±0.00  | -2.12±0.01  | -3.75±0.00  |
| hydrazine                              | -9.30  | -9.50±0.01  | -10.04±0.01 | -8.56±0.01  | -9.94±0.01  |
| 2-methoxy-1,1,1-trimethoxyethane       | -5.73  | -5.78±0.01  | -6.15±0.01  | -6.82±0.01  | -10.63±0.44 |
| phenyl trifluoroethyl ether            | -1.29  | -6.18±0.02  | -6.95±0.02  | -10.00±0.02 | -6.89±0.02  |
| pentanenitrile                         | -3.52  | -3.34±0.00  | -3.63±0.00  | -3.59±0.00  | -3.26±0.00  |
| 3,4-dimethylpyridine                   | -5.22  | -3.94±0.00  | -4.48±0.00  | -6.09±0.00  | -4.28±0.00  |
| o-cresol                               | -5.87  | -8.61±0.00  | -6.09±0.00  | -6.45±0.00  | -6.16±0.00  |
| acetonitrile                           | -3.88  | -4.40±0.00  | -4.74±0.00  | -4.88±0.00  | -4.21±0.00  |

|                                 |        |             |             |             |             |
|---------------------------------|--------|-------------|-------------|-------------|-------------|
| cyclohexane                     | 1.23   | 2.00±0.00   | 2.00±0.00   | 2.00±0.00   | 2.01±0.00   |
| methyl chloroacetate            | -4.00  | -5.57±0.00  | -6.43±0.00  | -6.65±0.00  | -6.06±0.00  |
| 2-methyltetrahydrofuran         | -3.30  | -0.73±0.00  | -0.89±0.00  | -1.77±0.00  | -1.83±0.00  |
| isoamyl formate                 | -2.13  | -5.11±0.00  | -5.92±0.00  | -5.23±0.00  | -5.99±0.01  |
| bromotrifluoromethane           | 1.79   | -1.45±0.00  | -1.63±0.00  | -3.79±0.00  | 0.85±0.00   |
| n-pentane                       | 2.32   | 2.07±0.00   | 2.06±0.00   | 2.15±0.00   | 2.07±0.00   |
| 1,2,3,5-tetrachlorobenzene      | -1.62  | 0.91±0.00   | 0.58±0.00   | 0.15±0.00   | 0.81±0.00   |
| methylcyclopentane              | 1.59   | 2.02±0.00   | 2.04±0.00   | 2.01±0.00   | 2.00±0.00   |
| cyclohexanone                   | -4.91  | -3.93±0.01  | -4.46±0.01  | -4.34±0.01  | -4.49±0.01  |
| 4-methylpyridine                | -4.93  | -4.39±0.00  | -5.04±0.00  | -6.66±0.00  | -4.65±0.00  |
| 1,2-diacetoxyethane             | -6.34  | -10.31±0.01 | -11.69±0.01 | -11.59±0.01 | -12.61±0.01 |
| 2-methylbuta-1,3-diene          | 0.68   | 0.32±0.00   | 0.09±0.00   | 0.15±0.00   | 0.23±0.01   |
| dimethyl sulfide                | -1.61  | -0.46±0.00  | -0.75±0.00  | -0.73±0.00  | -0.97±0.00  |
| heptan-4-one                    | -2.92  | -3.31±0.00  | -3.87±0.00  | -3.68±0.00  | -4.14±0.00  |
| 3-methoxyphenol                 | -7.66  | -10.85±0.01 | -8.15±0.01  | -8.62±0.01  | -8.38±0.01  |
| quinoline                       | -5.72  | -5.42±0.00  | -6.21±0.00  | -8.24±0.00  | -5.78±0.00  |
| trimethoxy methane              | -4.42  | -3.94±0.01  | -4.37±0.01  | -4.74±0.01  | -6.55±0.01  |
| 2-methylhexane                  | 2.93   | 2.33±0.00   | 2.35±0.00   | 2.43±0.00   | 2.29±0.00   |
| formaldehyde                    | -2.75  | -6.57±0.00  | -6.92±0.00  | -6.12±0.00  | -6.08±0.00  |
| acenaphthene                    | -3.15  | -2.97±0.00  | -3.28±0.00  | -5.05±0.00  | -3.41±0.00  |
| methyl benzoate                 | -3.92  | -6.29±0.00  | -7.24±0.00  | -8.03±0.00  | -7.17±0.00  |
| azetidine                       | -5.56  | -2.52±0.02  | -3.12±0.02  | -3.92±0.02  | -4.11±0.06  |
| methanethiol                    | -1.24  | -1.84±0.00  | -1.50±0.00  | -1.48±0.00  | -1.81±0.00  |
| oct-1-yne                       | 0.71   | 0.85±0.00   | 0.62±0.00   | 0.67±0.00   | 0.81±0.00   |
| 1-chlorobutane                  | -0.16  | 0.39±0.00   | 0.21±0.00   | 0.28±0.00   | 0.23±0.00   |
| 3-chloropyridine                | -4.01  | -3.83±0.00  | -4.49±0.00  | -6.12±0.00  | -3.90±0.00  |
| 2-fluorophenol                  | -5.29  | -7.93±0.00  | -5.03±0.00  | -5.79±0.00  | -5.00±0.00  |
| methane                         | 1.99   | 1.53±0.00   | 1.53±0.00   | 1.56±0.00   | 1.55±0.00   |
| N-methylacetamide               | -10.00 | -8.60±0.00  | -9.39±0.00  | -9.92±0.00  | -9.78±0.01  |
| cyclohexene                     | 0.37   | 1.14±0.00   | 1.01±0.00   | 0.90±0.00   | 1.07±0.00   |
| morpholine                      | -7.17  | -3.94±0.06  | -4.42±0.06  | -5.93±0.06  | -6.36±0.11  |
| 1-nitrobutane                   | -3.09  | -7.93±0.01  | -8.85±0.01  | -8.25±0.01  | -8.50±0.01  |
| methanesulfonyl chloride        | -4.87  | -11.09±0.00 | -12.54±0.00 | -13.30±0.00 | -8.72±0.00  |
| 1-iodopentane                   | -0.14  | -1.97±0.00  | -2.30±0.00  | -2.04±0.00  | -0.90±0.00  |
| methyl ethyl ether              | -2.10  | -0.78±0.00  | -1.15±0.00  | -1.50±0.00  | -1.62±0.00  |
| N,N-dimethyl-p-methoxybenzamide | -11.01 | -9.07±0.02  | -10.07±0.02 | -11.29±0.02 | -11.04±0.13 |
| 2-isobutylpyrazine              | -5.04  | -6.86±0.01  | -7.65±0.01  | -9.86±0.01  | -7.78±0.01  |
| methyl hexanoate                | -2.49  | -4.09±0.00  | -4.78±0.00  | -4.65±0.00  | -5.18±0.00  |
| 2,3-dimethylnaphthalene         | -2.78  | -2.36±0.00  | -2.72±0.00  | -4.16±0.00  | -2.94±0.00  |
| n-propanethiol                  | -1.06  | -1.38±0.00  | -1.11±0.00  | -0.97±0.00  | -1.63±0.00  |
| methanol                        | -5.10  | -6.58±0.00  | -4.74±0.00  | -4.08±0.00  | -4.98±0.00  |
| 3-acetylpyridine                | -8.26  | -9.46±0.21  | -10.65±0.21 | -12.41±0.21 | -10.19±0.22 |
| 4-methoxyacetophenone           | -4.40  | -7.53±0.00  | -8.60±0.00  | -9.62±0.00  | -8.54±0.00  |
| 2,6-dimethylpyridine            | -4.59  | -3.92±0.00  | -4.41±0.00  | -6.12±0.00  | -4.22±0.00  |
| 2,2-dimethylbutane              | 2.51   | 2.12±0.00   | 2.15±0.00   | 2.17±0.00   | 2.13±0.00   |
| 1,1,2-trichloroethane           | -1.99  | -1.19±0.02  | -1.62±0.02  | -2.11±0.02  | -1.11±0.02  |
| 3-formylpyridine                | -7.10  | -10.15±0.00 | -11.30±0.00 | -12.61±0.00 | -10.26±0.01 |
| 1-iodopropane                   | -0.53  | -2.33±0.00  | -2.66±0.00  | -2.44±0.00  | -1.23±0.00  |
| cycloheptanol                   | -5.48  | -4.40±0.00  | -2.81±0.00  | -2.30±0.00  | -3.94±0.00  |
| butanenitrile                   | -3.64  | -3.53±0.00  | -3.83±0.00  | -3.81±0.00  | -3.44±0.00  |
| 4-fluorophenol                  | -6.19  | -9.10±0.01  | -6.34±0.01  | -6.70±0.01  | -6.38±0.01  |
| 4-methylpentan-2-ol             | -3.73  | -4.30±0.01  | -2.76±0.01  | -2.18±0.01  | -3.87±0.01  |
| isobutyl formate                | -2.22  | -5.27±0.01  | -6.07±0.01  | -5.40±0.01  | -6.09±0.01  |
| 4-methyl-1h-imidazole           | -10.27 | -8.32±0.01  | -9.00±0.01  | -11.12±0.01 | -9.07±0.01  |
| 3-methylheptane                 | 2.97   | 2.48±0.00   | 2.51±0.00   | 2.60±0.00   | 2.41±0.00   |
| 3-methylpyridine                | -4.77  | -4.19±0.00  | -4.80±0.00  | -6.37±0.00  | -4.46±0.00  |
| decan-2-one                     | -2.34  | -3.17±0.00  | -3.75±0.00  | -3.63±0.00  | -4.04±0.00  |
| 3-methylbutan-1-ol              | -4.42  | -5.12±0.00  | -3.41±0.00  | -2.75±0.00  | -4.19±0.00  |
| 2,4-dimethylphenol              | -6.01  | -8.18±0.01  | -5.60±0.00  | -6.07±0.01  | -5.91±0.00  |
| methyl cyclopropanecarboxylate  | -4.10  | -5.14±0.00  | -5.81±0.00  | -6.06±0.00  | -6.91±0.01  |
| 2-naphthylamine                 | -7.47  | -7.45±0.00  | -8.22±0.00  | -9.77±0.00  | -8.50±0.06  |



|                                       |       |             |             |             |             |
|---------------------------------------|-------|-------------|-------------|-------------|-------------|
| 2-methoxyethanol                      | -6.76 | -6.54±0.01  | -5.22±0.01  | -4.86±0.01  | -6.35±0.01  |
| 2-chlorobutane                        | 0.00  | 0.28±0.00   | 0.10±0.00   | 0.19±0.00   | 0.06±0.00   |
| methyl-tert-butyl ether               | -2.21 | -0.45±0.00  | -0.66±0.00  | -1.13±0.00  | -1.33±0.00  |
| 3-cyanopyridine                       | -6.75 | -7.52±0.00  | -8.33±0.00  | -9.93±0.00  | -7.45±0.00  |
| methyl butanoate                      | -2.83 | -4.50±0.00  | -5.21±0.00  | -5.11±0.00  | -5.55±0.00  |
| octanal                               | -2.29 | -3.96±0.00  | -4.57±0.00  | -4.08±0.00  | -4.59±0.00  |
| cyclopentane                          | 1.20  | 1.88±0.00   | 1.87±0.00   | 1.87±0.00   | 1.89±0.00   |
| 2-phenylethanol                       | -6.79 | -7.45±0.01  | -6.04±0.01  | -6.23±0.01  | -6.68±0.01  |
| bromomethane                          | -0.82 | -0.27±0.00  | -0.47±0.00  | -0.41±0.00  | 0.13±0.00   |
| tetrachloroethene                     | 0.10  | 2.18±0.00   | 2.17±0.00   | 2.08±0.00   | 2.26±0.00   |
| 1-bromooctane                         | 0.52  | 0.71±0.00   | 0.53±0.00   | 0.71±0.00   | 1.00±0.00   |
| 1,1,2-trichloro-1,2,2-trifluoroethane | 1.77  | -1.05±0.00  | -0.95±0.00  | -5.28±0.00  | 1.33±0.00   |
| pyridine                              | -4.69 | -4.71±0.00  | -5.43±0.00  | -7.04±0.00  | -4.86±0.00  |
| 4-ethylpyridine                       | -4.73 | -4.10±0.00  | -4.72±0.00  | -6.33±0.00  | -4.45±0.00  |
| alpha-methylstyrene                   | -1.24 | -1.73±0.00  | -2.16±0.00  | -2.96±0.00  | -2.10±0.00  |
| isopropyl formate                     | -2.02 | -5.42±0.00  | -6.23±0.00  | -5.64±0.00  | -6.30±0.00  |
| methyl t-butyl ether                  | -2.21 | -0.45±0.00  | -0.67±0.00  | -1.14±0.00  | -1.33±0.00  |
| N,N-dimethylformamide                 | -7.81 | -7.66±0.00  | -8.49±0.00  | -8.31±0.00  | -8.44±0.00  |
| heptan-1-ol                           | -4.21 | -4.83±0.00  | -3.11±0.00  | -2.45±0.00  | -3.94±0.00  |
| 2,2-dimethylpropane                   | 2.51  | 1.99±0.00   | 2.00±0.00   | 2.02±0.00   | 2.02±0.00   |
| 1,3,5-trimethylbenzene                | -0.90 | -0.49±0.00  | -0.69±0.00  | -1.55±0.00  | -0.87±0.00  |
| methylamine                           | -4.55 | -4.33±0.01  | -5.13±0.01  | -4.08±0.01  | -4.99±0.01  |
| 2-methylpropan-1-ol                   | -4.50 | -5.12±0.01  | -3.45±0.01  | -2.80±0.01  | -4.21±0.01  |
| propyne                               | -0.48 | -0.09±0.00  | -0.34±0.00  | -0.38±0.00  | 0.05±0.00   |
| 2,2,4-trimethylpentane                | 2.89  | 2.39±0.00   | 2.46±0.00   | 2.50±0.00   | 2.34±0.00   |
| cyclopropane                          | 0.75  | 1.39±0.00   | 1.34±0.00   | 1.46±0.00   | 1.49±0.00   |
| pentan-2-ol                           | -4.39 | -4.64±0.00  | -3.05±0.00  | -2.50±0.00  | -3.97±0.00  |
| 2-methylbutan-1-ol                    | -4.42 | -4.86±0.01  | -3.19±0.01  | -2.51±0.01  | -4.05±0.01  |
| 1-iodobutane                          | -0.25 | -2.12±0.00  | -2.44±0.00  | -2.20±0.00  | -1.03±0.00  |
| 2-ethylpyridine                       | -4.33 | -4.05±0.00  | -4.65±0.00  | -6.11±0.00  | -4.35±0.00  |
| propanenitrile                        | -3.84 | -3.81±0.00  | -4.12±0.00  | -4.15±0.00  | -3.69±0.00  |
| N,N-dimethyl piperazine               | -7.58 | -2.24±0.01  | -0.74±0.00  | -6.38±0.01  | -6.24±0.01  |
| triacetyl glycerol                    | -8.84 | -24.56±0.42 | -16.02±0.40 | -14.05±0.42 | -20.33±0.41 |
| n-nonane                              | 3.13  | 2.66±0.00   | 2.67±0.00   | 2.80±0.00   | 2.56±0.00   |
| benzene                               | -0.86 | -1.58±0.00  | -2.04±0.00  | -2.67±0.00  | -1.54±0.00  |
| 1-methylcyclohexene                   | 0.67  | 1.38±0.00   | 1.33±0.00   | 1.09±0.00   | 1.22±0.00   |
| 1-iodoheptane                         | 0.27  | -1.68±0.00  | -2.00±0.00  | -1.72±0.00  | -0.65±0.00  |
| isoamyl acetate                       | -2.21 | -4.64±0.00  | -5.34±0.00  | -5.38±0.00  | -8.39±0.58  |
| phenanthrene                          | -3.88 | -4.32±0.00  | -4.97±0.00  | -6.78±0.00  | -5.04±0.00  |
| 2-methylpent-1-ene                    | 1.47  | 1.47±0.00   | 1.37±0.00   | 1.46±0.00   | 1.37±0.00   |
| cis-1,2-dimethylcyclohexane           | 1.58  | 2.26±0.00   | 2.33±0.00   | 2.28±0.00   | 2.22±0.00   |
| cyclopentene                          | 0.56  | 0.87±0.00   | 0.69±0.00   | 0.58±0.00   | 0.84±0.00   |
| n-propylcyclopentane                  | 2.13  | 2.33±0.00   | 2.38±0.00   | 2.36±0.00   | 2.25±0.00   |
| 3,5-dimethylphenol                    | -6.27 | -8.41±0.00  | -5.65±0.00  | -6.12±0.00  | -6.02±0.00  |
| bromoethane                           | -0.74 | -0.31±0.00  | -0.51±0.00  | -0.43±0.00  | 0.11±0.00   |
| chloromethane                         | -0.55 | -0.18±0.00  | -0.37±0.00  | -0.36±0.00  | -0.20±0.00  |
| hexan-2-one                           | -3.28 | -3.77±0.00  | -4.37±0.00  | -4.29±0.00  | -4.53±0.00  |
| phenyl methyl sulfide                 | -2.73 | -1.68±0.00  | -2.13±0.00  | -3.00±0.00  | -2.18±0.00  |
| 2-propoxyethanol                      | -6.40 | -5.57±0.01  | -4.06±0.00  | -3.85±0.01  | -5.57±0.00  |
| 2,6-dimethylphenol                    | -5.26 | -7.57±0.01  | -5.19±0.01  | -5.74±0.01  | -5.50±0.01  |
| methyl cyclopropyl ketone             | -4.61 | -4.72±0.00  | -5.35±0.00  | -5.60±0.00  | -5.88±0.00  |
| diisopropylamine                      | -3.22 | -0.18±0.01  | 0.12±0.01   | -0.83±0.01  | -2.10±0.01  |
| n-propyl acetate                      | -2.79 | -4.52±0.00  | -5.18±0.00  | -5.30±0.00  | -5.61±0.00  |
| hydrogen sulfide                      | -0.70 | -4.40±0.00  | -2.62±0.00  | -2.84±0.00  | -3.00±0.00  |
| methyl cyclohexyl ketone              | -3.90 | -3.33±0.01  | -3.88±0.01  | -3.74±0.01  | -4.24±0.02  |
| 2-methylbutane                        | 2.38  | 2.03±0.00   | 2.03±0.00   | 2.10±0.00   | 2.04±0.00   |
| methyl ethyl sulfide                  | -1.50 | -0.42±0.00  | -0.73±0.00  | -0.68±0.00  | -1.05±0.00  |
| butan-2-ol                            | -4.62 | -4.82±0.00  | -3.25±0.00  | -2.73±0.00  | -4.16±0.00  |
| ethanamide                            | -9.71 | -9.11±0.00  | -9.76±0.00  | -10.43±0.00 | -10.38±0.00 |
| 1,1-dichloroethene                    | 0.25  | 0.60±0.00   | 0.38±0.00   | 0.22±0.00   | 0.53±0.00   |
| trimethoxymethylbenzene               | -4.04 | -5.33±0.03  | -5.67±0.03  | -7.10±0.03  | -7.46±0.04  |

|                               |        |             |             |             |             |
|-------------------------------|--------|-------------|-------------|-------------|-------------|
| diethyl succinate             | -5.71  | -10.09±0.02 | -11.33±0.02 | -11.30±0.02 | -13.59±0.26 |
| 4-formylpyridine              | -7.00  | -9.89±0.00  | -11.05±0.00 | -12.41±0.00 | -10.13±0.00 |
| 4-nitrophenol                 | -10.64 | -17.10±0.01 | -14.45±0.01 | -14.60±0.01 | -13.95±0.01 |
| 2-methylpropan-2-ol           | -4.47  | -4.75±0.00  | -3.28±0.00  | -2.87±0.00  | -4.18±0.00  |
| 1-ethylnaphthalene            | -2.40  | -2.45±0.00  | -2.85±0.00  | -4.18±0.00  | -3.00±0.00  |
| ethanol                       | -5.00  | -5.96±0.00  | -4.21±0.00  | -3.63±0.00  | -4.72±0.00  |
| propanoic acid                | -6.46  | -10.27±0.35 | -7.14±0.33  | -6.67±0.35  | -7.77±0.33  |
| methoxyflurane                | -1.12  | -2.53±0.02  | -2.94±0.02  | -5.38±0.02  | -2.60±0.02  |
| di-n-butylamine               | -3.24  | 0.06±0.03   | 0.07±0.03   | -0.43±0.03  | -2.17±0.09  |
| methyl-isopropyl-ether        | -2.01  | -0.57±0.00  | -0.84±0.00  | -1.28±0.00  | -1.49±0.00  |
| diethyl disulfide             | -1.64  | -1.00±0.00  | -1.30±0.00  | -1.59±0.00  | -1.73±0.00  |
| 4-acetylpyridine              | -7.62  | -9.06±0.00  | -10.24±0.00 | -11.98±0.00 | -9.80±0.00  |
| nonanal                       | -2.07  | -3.81±0.00  | -4.41±0.00  | -3.91±0.00  | -4.51±0.02  |
| N-methylaniline               | -4.69  | -4.81±0.00  | -5.44±0.00  | -7.04±0.00  | -5.47±0.01  |
| nonan-5-one                   | -2.64  | -2.96±0.00  | -3.51±0.00  | -3.29±0.00  | -3.92±0.02  |
| ethyl acetate                 | -2.94  | -4.80±0.00  | -5.51±0.00  | -5.64±0.00  | -5.85±0.00  |
| E-oct-2-enal                  | -3.43  | -4.76±0.00  | -5.36±0.00  | -5.24±0.00  | -5.11±0.02  |
| indane                        | -1.46  | -1.02±0.00  | -1.26±0.00  | -2.30±0.00  | -1.27±0.00  |
| 1,1-diacetoxyethane           | -4.97  | -9.39±0.07  | -10.58±0.07 | -10.55±0.07 | -11.89±0.07 |
| thiophenol                    | -2.55  | -2.83±0.00  | -2.57±0.00  | -3.46±0.00  | -2.70±0.00  |
| 4-bromophenol                 | -7.13  | -9.35±0.00  | -6.51±0.00  | -6.85±0.00  | -6.24±0.00  |
| n-hexylamine                  | -3.95  | -2.45±0.00  | -3.16±0.00  | -2.16±0.00  | -4.23±0.10  |
| p-xylene                      | -0.80  | -0.85±0.00  | -1.15±0.00  | -1.93±0.00  | -1.11±0.00  |
| pentan-2-one                  | -3.52  | -3.96±0.00  | -4.56±0.00  | -4.50±0.00  | -4.69±0.00  |
| triethyl phosphate            | -7.54  | -9.89±0.01  | -11.02±0.01 | -9.75±0.01  | -15.29±0.50 |
| E-but-2-enal                  | -4.22  | -5.56±0.00  | -6.18±0.00  | -6.12±0.00  | -5.67±0.00  |
| heptan-2-one                  | -3.04  | -3.63±0.00  | -4.23±0.00  | -4.14±0.00  | -4.50±0.02  |
| N-methylpiperazine            | -7.77  | -3.60±0.00  | -3.11±0.00  | -7.08±0.00  | -7.02±0.00  |
| 3-methyl-but-1-ene            | 1.83   | 1.28±0.00   | 1.17±0.00   | 1.33±0.00   | 1.24±0.00   |
| 1-nitropentane                | -2.82  | -7.73±0.00  | -8.64±0.00  | -8.04±0.00  | -8.34±0.01  |
| bis(2-chloroethyl) ether      | -4.23  | -2.92±0.01  | -3.54±0.01  | -4.20±0.01  | -3.92±0.01  |
| 1,2,4-trichlorobenzene        | -1.12  | 0.04±0.00   | -0.39±0.00  | -0.91±0.00  | -0.12±0.00  |
| E-1,2-dichloroethene          | -0.78  | 0.15±0.00   | -0.21±0.00  | -0.63±0.00  | 0.11±0.00   |
| 3-methylbutan-2-one           | -3.24  | -3.79±0.00  | -4.37±0.00  | -4.28±0.00  | -4.56±0.00  |
| chloroethylene                | -0.59  | -0.09±0.00  | -0.36±0.00  | -0.50±0.00  | -0.13±0.00  |
| 2-methylpropane               | 2.32   | 1.90±0.00   | 1.89±0.00   | 1.95±0.00   | 1.93±0.00   |
| N,N-dimethylaniline           | -3.45  | -3.67±0.00  | -3.64±0.00  | -6.50±0.00  | -4.39±0.00  |
| 2-methylpyrazine              | -5.51  | -7.89±0.00  | -8.79±0.00  | -11.28±0.00 | -8.53±0.00  |
| pentanoic acid                | -6.16  | -9.35±0.05  | -6.29±0.03  | -5.77±0.05  | -7.09±0.03  |
| ethyl hexanoate               | -2.23  | -3.70±0.00  | -4.29±0.00  | -4.32±0.00  | -5.05±0.03  |
| 3,3,3-trimethoxypropionitrile | -6.40  | -6.91±0.01  | -7.37±0.01  | -7.70±0.01  | -8.61±0.01  |
| phenol                        | -6.61  | -9.25±0.01  | -6.62±0.01  | -6.97±0.01  | -6.54±0.01  |
| cyclohepta-1,3,5-triene       | -0.99  | -1.00±0.01  | -1.40±0.01  | -1.85±0.01  | -1.02±0.01  |
| methyl propanoate             | -2.93  | -4.73±0.00  | -5.45±0.00  | -5.38±0.00  | -5.70±0.00  |
| 1,2-dichlorobenzene           | -1.36  | -0.78±0.00  | -1.21±0.00  | -1.73±0.00  | -0.93±0.00  |
| 2-methylpentan-3-ol           | -3.88  | -3.88±0.01  | -2.45±0.01  | -1.86±0.01  | -3.59±0.01  |
| oct-1-ene                     | 1.92   | 1.76±0.00   | 1.65±0.00   | 1.88±0.00   | 1.62±0.00   |
| 2-nitrotoluene                | -3.58  | -8.69±0.00  | -9.72±0.00  | -10.02±0.00 | -9.38±0.01  |
| di-isopropyl sulfide          | -1.21  | -0.27±0.01  | -0.58±0.01  | -0.50±0.01  | -1.30±0.01  |
| 2,3-dimethylbutane            | 2.34   | 2.13±0.00   | 2.16±0.00   | 2.21±0.00   | 2.14±0.00   |
| thiophene                     | -1.42  | -0.96±0.00  | -1.35±0.00  | -2.39±0.00  | -1.09±0.00  |
| piperazine                    | -7.40  | -5.11±0.03  | -5.58±0.03  | -7.80±0.03  | -8.25±0.09  |
| prop-2-en-1-ol                | -5.03  | -6.17±0.01  | -4.52±0.01  | -4.04±0.01  | -4.98±0.01  |
| isopropylbenzene              | -0.30  | -0.72±0.00  | -1.02±0.00  | -1.74±0.00  | -1.03±0.00  |
| 2,2,2-trifluoroethanol        | -4.31  | -10.05±0.01 | -6.99±0.01  | -8.22±0.01  | -6.90±0.01  |
| n-pentylcyclopentane          | 2.55   | 2.63±0.00   | 2.69±0.00   | 2.69±0.00   | 2.49±0.00   |
| 2-butoxyethanol               | -6.25  | -5.83±0.01  | -4.03±0.01  | -3.79±0.01  | -7.48±0.72  |
| N,N-dimethylbenzamide         | -9.29  | -7.88±0.01  | -8.73±0.01  | -9.82±0.01  | -9.03±0.01  |
| but-1-yne                     | -0.16  | 0.19±0.00   | -0.05±0.00  | -0.07±0.00  | 0.26±0.00   |
| N-methylpiperidine            | -3.88  | -0.13±0.03  | 0.64±0.03   | -2.10±0.03  | -2.16±0.05  |
| 4-methylacetophenone          | -4.70  | -5.84±0.00  | -6.67±0.00  | -7.60±0.00  | -6.57±0.00  |

|                               |       |            |            |            |            |
|-------------------------------|-------|------------|------------|------------|------------|
| fluoromethane                 | -0.22 | -0.70±0.00 | -0.92±0.00 | -0.89±0.00 | -0.76±0.00 |
| 1,2,3-trichlorobenzene        | -1.24 | -0.16±0.00 | -0.54±0.00 | -0.94±0.00 | -0.31±0.00 |
| 2-chloropropane               | -0.25 | 0.06±0.00  | -0.12±0.00 | -0.07±0.00 | -0.13±0.00 |
| 4-chloroaniline               | -5.90 | -5.64±0.00 | -6.35±0.00 | -7.24±0.00 | -6.27±0.00 |
| hexa-1,5-diene                | 1.01  | 0.76±0.00  | 0.53±0.00  | 0.82±0.00  | 0.63±0.00  |
| 2-methylbut-2-ene             | 1.31  | 1.28±0.00  | 1.17±0.00  | 1.14±0.00  | 1.19±0.00  |
| di-n-propyl ether             | -1.16 | 0.14±0.00  | 0.04±0.00  | -0.44±0.00 | -0.97±0.02 |
| m-cresol                      | -5.49 | -8.82±0.01 | -6.13±0.01 | -6.51±0.01 | -6.27±0.01 |
| trichloroethene               | -0.44 | 0.73±0.00  | 0.49±0.00  | 0.17±0.00  | 0.73±0.00  |
| ethene                        | 1.28  | 0.71±0.00  | 0.62±0.00  | 0.84±0.00  | 0.85±0.00  |
| n-hexane                      | 2.48  | 2.21±0.00  | 2.21±0.00  | 2.31±0.00  | 2.19±0.00  |
| hept-1-yne                    | 0.60  | 0.70±0.00  | 0.47±0.00  | 0.50±0.00  | 0.69±0.00  |
| 1-methylnaphthalene           | -2.44 | -2.73±0.00 | -3.19±0.00 | -4.52±0.00 | -3.19±0.00 |
| dimethyl ether                | -1.91 | -1.20±0.00 | -1.68±0.00 | -1.85±0.00 | -1.93±0.00 |
| methyl cyclohexanecarboxylate | -3.30 | -3.69±0.05 | -4.31±0.05 | -4.08±0.05 | -4.90±0.05 |
| pentanal                      | -3.03 | -4.43±0.01 | -5.04±0.01 | -4.58±0.01 | -4.96±0.01 |
| 1H-pyrrole                    | -4.78 | -4.55±0.00 | -5.09±0.00 | -6.25±0.00 | -4.50±0.00 |
| penta-1,4-diene               | 0.93  | 0.50±0.00  | 0.28±0.00  | 0.51±0.00  | 0.43±0.00  |
| 3-nitrotoluene                | -3.45 | -8.24±0.01 | -9.25±0.01 | -9.69±0.01 | -8.58±0.01 |
| cyanobenzene                  | -4.10 | -4.57±0.00 | -5.18±0.00 | -5.77±0.00 | -4.57±0.00 |

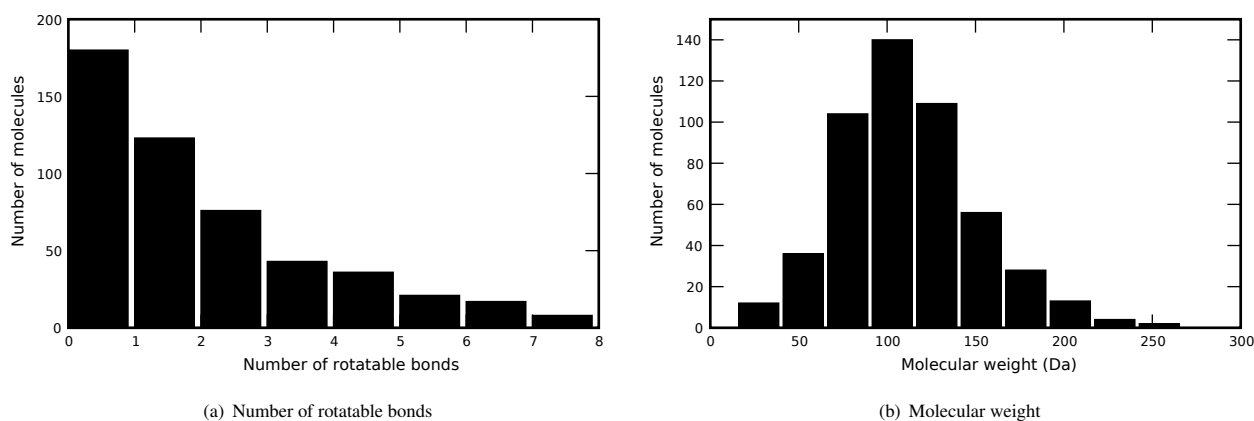

**Figure 1. Distributions of the number of rotatable bonds and molecular weight for the 504 molecule test set.**

## References

- [1] Rizzo, R. C.; Aynechi, T.; Case, D. A.; Kuntz, I. D. *J. Chem. Theory Comput.* **2006**, *2*, 128-139.
- [2] Bordner, A. J.; Cavasotto, C. N.; Abagyan, R. A. *J. Phys. Chem. B.* **2002**, *106*, 11009-11015.
- [3] Shirts, M. R.; Pitner, J. W.; Swope, W. C.; Pande, V. S. *J. Chem. Phys.* **2003**, *119*, 5740-5761.
- [4] Guthrie, J. P. *Can. J. Chem.* **1991**, *69*, 1893-1903.
- [5] Guthrie, J. P. *Can. J. Chem.* **1976**, *54*, 202-209.
- [6] et al., J. P. G. *Can. J. Chem.* **1980**, *58*, 1281-1294.
- [7] et al., J. P. G. *Can. J. Chem.* **1992**, *70*, 1671-1683.
- [8] Guthrie, J. P. *Can. J. Chem.* **1992**, *70*, 1942-1054.
- [9] et al., C. H. R. *J. Chem. Soc. Faraday Trans. 1* **1973**, 1577-1585.
- [10] Guthrie, J. P. *J. Am. Chem. Soc.* **1973**, *95*, 6999-7003.
- [11] Lu, J. **1994**, Ph.D. Thesis, University of Western Ontario.
- [12] et al., J. P. G. *Can. J. Chem.* **1993**, *71*, 2109-2122.

- [13] Guthrie, J. P. manuscript in preparation.
- [14] Guthrie, J. P. Unpublished data.
- [15] et al., S. W. *Env. Tech. Lett.* **1987**, *8*, 483-486 Estimated by J. Peter Guthrie from Henry's law constant at 298 K by interpolation using the temperature dependence equation.
- [16] et al., J. P. G. *Can. J. Chem.* **1998**, *76*, 929-936.
- [17] et al., J. P. G. Manuscript in preparation.
- [18] et al., W. J. D. *J. Geophys. Res.* **1994**, *99D*, 16927-16932.
- [19] Guthrie, J. P. personal communication, based on Henry's law constant.
- [20] Guthrie, J. P. *Can. J. Chem.* **1978**, *56*, 2342-2354.
- [21] et al., M. H. A. *J. Chem. Soc. Perkin Trans. 2* **1994**, *2*, 1777-1791.
- [22] Wolfenden, R.; Williams, R. *J. Am. Chem. Soc.* **1983**, *105*, 1028-1031.
- [23] Tsui, V.; Case, D. A. *Biopolymers (Nucl. Acid. Sci.)* **2001**, *56*, 275-291.
- [24] Onufriev, A.; Bashford, D.; Case, D. A. *Proteins: Struct., Funct., Bioinf.* **2004**, *55*, 383-394.
- [25] Mongan, J.; Simmerling, C.; McCammon, J. A.; Case, D. A.; Onufriev, A. *J. Chem. Theor. Comput.* **2007**, *3*, 156 - 169.

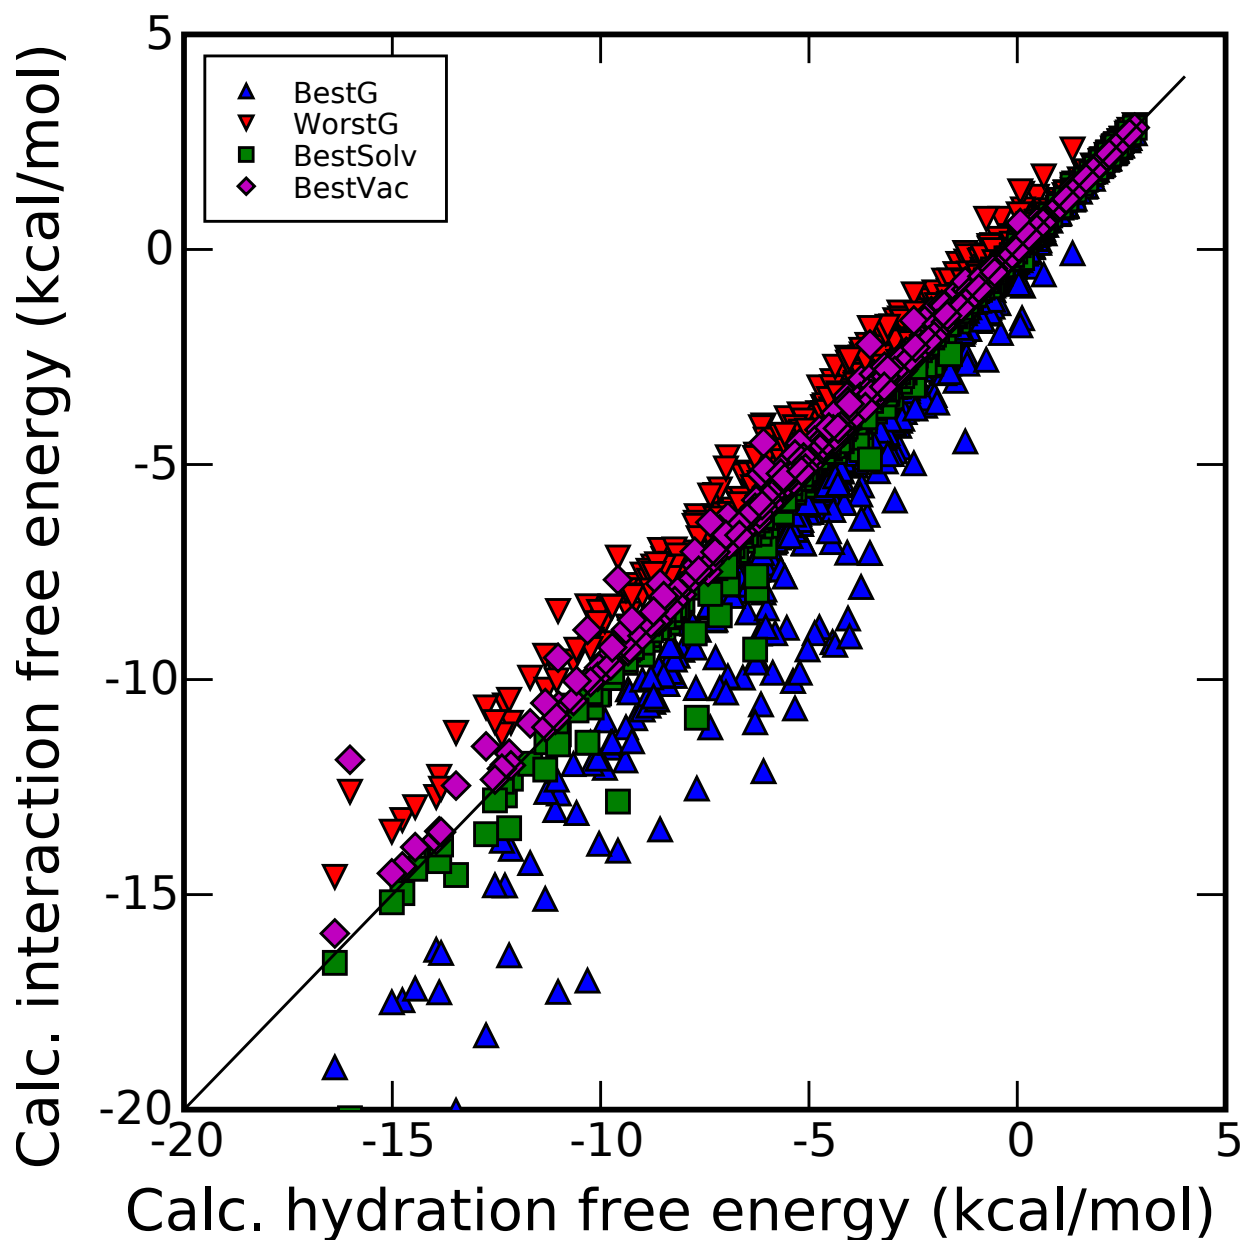

**Figure 2. Calculated hydration free energies versus interaction free energies computed with different conformations.** Calculated hydration free energies are plotted, versus single-conformation interaction free energies computed using the different schemes for selecting conformations: BestG, the conformation resulting in the most favorable interaction free energy; WorstG, the conformation resulting in the least favorable interaction free energy; BestVac, the conformation with the lowest potential energy in vacuum; BestSolv, the conformation with the lowest potential energy in solvent. The diagonal line is the  $x = y$  line, and indicates exact agreement between calculated interaction free energies and calculated hydration free energies.
